# Supplementary material for: Effect of physical activity and dietary restriction interventions on weight loss and the musculoskeletal function of overweight and obese older adults with knee osteoarthritis: a systematic review and mixed method data synthesis
Source: PubMed Central journal article supplement — BMJ Open. 2017 Jun 8;7(6):e014537. doi: 10.1136/bmjopen-2016-014537 (PMC5541637; doi:10.1136/bmjopen-2016-014537), 2017-06-08
Supplement: bmjopen-2016-014537.draft_revisions.pdf [file bmjopen-2016-014537.draft_revisions.pdf]

# BMJ Open

## The effect of physical activity and dietary restriction interventions on the musculoskeletal function of overweight and obese elders with knee osteoarthritis: a systematic review and mixed method data synthesis

|                                 |                                                                                                                                                                                                                                                                                                                                                                                                                                                                                                                                                                                                                                                                                                                                                                                    |
|---------------------------------|------------------------------------------------------------------------------------------------------------------------------------------------------------------------------------------------------------------------------------------------------------------------------------------------------------------------------------------------------------------------------------------------------------------------------------------------------------------------------------------------------------------------------------------------------------------------------------------------------------------------------------------------------------------------------------------------------------------------------------------------------------------------------------|
| Journal:                        | <i>BMJ Open</i>                                                                                                                                                                                                                                                                                                                                                                                                                                                                                                                                                                                                                                                                                                                                                                    |
| Manuscript ID                   | bmjopen-2016-014537                                                                                                                                                                                                                                                                                                                                                                                                                                                                                                                                                                                                                                                                                                                                                                |
| Article Type:                   | Research                                                                                                                                                                                                                                                                                                                                                                                                                                                                                                                                                                                                                                                                                                                                                                           |
| Date Submitted by the Author:   | 07-Oct-2016                                                                                                                                                                                                                                                                                                                                                                                                                                                                                                                                                                                                                                                                                                                                                                        |
| Complete List of Authors:       | Alrushud, Asma; School of Sport, Exercise and Rehabilitation Sciences, University of Birmingham, Edgbaston, Birmingham, B15 2TT, UK<br>Rushton, Alison; School of Sport, Exercise and Rehabilitation Sciences, University of Birmingham, Edgbaston, Birmingham, B15 2TT, UK; MRC-Arthritis Research UK Centre for Musculoskeletal Ageing Research<br>Kanavaki, Archontissa; School of Sport, Exercise and Rehabilitation Sciences, University of Birmingham, Edgbaston, Birmingham, B15 2TT, UK; MRC-Arthritis Research UK Centre for Musculoskeletal Ageing Research<br>Greig, Carolyn; School of Sport, Exercise and Rehabilitation Sciences, University of Birmingham, Edgbaston, Birmingham, B15 2TT, UK; MRC-Arthritis Research UK Centre for Musculoskeletal Ageing Research |
| <b>Primary Subject Heading</b>: | Geriatric medicine                                                                                                                                                                                                                                                                                                                                                                                                                                                                                                                                                                                                                                                                                                                                                                 |
| Secondary Subject Heading:      | Sports and exercise medicine, Occupational and environmental medicine                                                                                                                                                                                                                                                                                                                                                                                                                                                                                                                                                                                                                                                                                                              |
| Keywords:                       | Rehabilitation medicine < INTERNAL MEDICINE, Knee < ORTHOPAEDIC & TRAUMA SURGERY, Musculoskeletal disorders < ORTHOPAEDIC & TRAUMA SURGERY                                                                                                                                                                                                                                                                                                                                                                                                                                                                                                                                                                                                                                         |
|                                 |                                                                                                                                                                                                                                                                                                                                                                                                                                                                                                                                                                                                                                                                                                                                                                                    |

SCHOLARONE™  
Manuscripts

1  
2  
3  
4  
5  
6 **The effect of physical activity and dietary restriction interventions on the**  
7 **musculoskeletal function of overweight and obese elders with knee**  
8 **osteoarthritis: a systematic review and mixed method data synthesis**  
9

10  
11  
12 Asma S Alrushud<sup>1</sup>, Alison B Rushton<sup>1,2</sup>, Archontissa M Kanavaki<sup>1,2</sup> and Carolyn A Greig<sup>1,2</sup>.

13 <sup>1</sup>School of Sport, Exercise and Rehabilitation Sciences, <sup>2</sup>MRC-Arthritis Research UK Centre  
14 for Musculoskeletal Ageing Research, University of Birmingham, Edgbaston, Birmingham,  
15 B15 2TT, UK  
16  
17

18  
19  
20 **Corresponding author**

21 Asma S Alrushud, School of Sport, Exercise and Rehabilitation Sciences, University of  
22 Birmingham, Edgbaston, Birmingham BH15 2TT.

23 **Email:** [asa314@student.bham.ac.uk](mailto:asa314@student.bham.ac.uk)

24 **Telephone number:** +44 121 414 8743  
25  
26

27 **Keywords**

28 Exercise, diet, elderly, obesity, randomised controlled trials  
29

30 **Word count**

31 4,775  
32

33  
34 Number of figures: 2

35  
36 Number of tables: 3 within the text and 5 attached as supplementary  
37

38 Number of references: 43  
39

40 Number of supplementary files 6 (SR protocol, PRISMA 2009 checklist, cover letter and 5  
41 tables (1, 4&5, 6& 7)).  
42  
43  
44  
45  
46  
47  
48  
49  
50  
51  
52  
53  
54  
55  
56  
57  
58  
59  
60

## ABSTRACT

### Background

Despite the clinical recommendation of exercise and diet for people with knee osteoarthritis (OA) there are no systematic reviews synthesising the effectiveness of combining physical activity and dietary restriction interventions on the musculoskeletal function of overweight and obese elders with knee OA.

### Objective

To evaluate the effectiveness of combined physical activity and dietary restriction programmes on the musculoskeletal function of overweight and obese elders with knee OA.

### Information sources

A detailed search strategy was applied to key electronic databases (Ovid, Embase, Web of Science and CINAHL) for randomised controlled trials (RCTs) published in English prior to 10<sup>th</sup> December 2015.

### Participants

Participants with body mass index (BMI)  $\geq 25 \text{ kg.m}^{-2}$ , aged  $\geq 55$  years of age and radiographic evidence of knee OA.

### Interventions

Physical activity plus dietary restriction programmes with usual care or exercise as the comparators.

### Outcome measures

Primary outcome measures were body weight, BMI, or musculoskeletal function. Secondary outcome measures were pain and quality of life (QoL).

### Results

One pilot and two definitive trials with  $n=794$  participants were included. Two articles reporting additional data and outcome measures for one of the RCTs were identified. All included RCTs had an unclear risk of bias. Meta-analysis was only possible to evaluate mobility (6 min walk test) at 6 months and the pooled random effect 15.05 (95% CI -11.77 to 41.87) across 2 trials with  $n=155$  participants did not support the combined intervention programme. Narrative synthesis identified had higher scores for both body weight and the 6 minute walk test in the intervention groups. The physical component of the SF-36 was improved in the intervention group compared with usual care.

### Conclusion

There was moderate evidence of no effect of the combined intervention programme on mobility, while the preliminary synthesis showed differences for changes in body weight, mobility and QoL.

Protocol was registered in PROSPERO (CDR42015019088).

## Article summary

### Strengths and limitations of the review

- This is the first systematic review of combined physical activity and dietary restriction interventions in overweight and obese older adults with knee OA.
- The protocol of this review was registered in PROSPERO and followed the PRISMA guidelines and the Cochrane handbook; GRADE was used to evaluate the quality of the included trials.
- The review included a mixed methods analytical approach.
- Few eligible studies were identified however important information is highlighted which could inform clinical practice.

### Key messages

- The clinical recommendation for combined exercise and dietary intervention to manage knee OA is not well supported by the evidence.
- The quality of evidence of benefit of combining exercise and dietary interventions in older overweight/ obese adults with knee OA is unclear.
- High quality evidence is needed to investigate the effect of a combined intervention programme on musculoskeletal function and other important outcome measures such as body weight and QoL.

## INTRODUCTION

### Rational

Current evidence shows that the burden of chronic musculoskeletal conditions especially osteoarthritis (OA) increases with advancing age [1]. OA is the most common type of arthritis affecting older adults. It is a degenerative joint disease that may affect any joint within the body causing chronic pain, functional limitation and emotional disturbance, and may lead to disability and negatively affect quality of life (QoL) [2-4]. Moreover, OA is the fourth predicted cause of women's health problems. In the United Kingdom (UK) there is approximately 4.7 million older adults aged 45 years or over experiencing knee OA symptoms [1, 5]. In addition, more than 20 million people seek treatment for knee OA in the United States (US) [6, 7]. Given the increasing numbers of older adults in the population, combined with the increasing prevalence of obesity and being overweight throughout the population, it is anticipated that the incidence of knee OA will increase rapidly over the next decade [5].

Unfortunately there is no specific treatment for knee OA. Most recommendations describe three treatment modalities: non-pharmacological, pharmacological and surgical [8, 9]. Most knee OA evidence-based guidelines recommend nonsurgical treatment [10, 11] and most general practitioners prefer the non-pharmacological and non-surgical interventions as the first line of treatment (recognised as 'usual care') [8]. These interventions are focused on patient education, self-management, pain reduction, function and QoL improvement, body weight reduction and exercise (either land-based or water-based) [1, 11]. Several studies recommend obesity control for decreasing knee OA burden, since a decrease in body weight will lead to a reduction of joint load and inflammation [3, 11, 12]. Weight reduction could be considered as a functional treatment in knee OA rehabilitation since a 12-15% reduction compared with initial body weight has been shown to improve function and reduce pain [13]. Moreover, the appropriate percentage of body weight reduction has been investigated in a systematic review and meta-analysis of five randomised control trials (RCTs) [14]. The risk of bias of included RCTs was assessed using the Jadad score (an instrument designed to measure the possibility of bias, scoring 0 to 5 with low scores indicating high possibility of bias) [14,15]. The review authors assessed all trials as moderate risk of bias, with 3 RCTs scoring 3 and 2 RCTs scoring 2 [14]. The pooled effect sizes were 0.20 (95% CI 0 to 0.39) and 0.23 (0.04 to 0.42) for pain and physical disability respectively with a weight reduction of 6.1kg (4.7 to 7.6 kg). They concluded that professional treatment of knee OA should include a weight reduction plan and patients should be encouraged to lose at least 5% of body weight over a 20-week period to achieve symptomatic relief [14].

In addition to weight reduction, clinical guidelines for knee OA management and level 1 evidence recommend exercise therapy as the main intervention [14, 16-19]. Moderate intensity aerobic exercise (e.g. walking) is recommended to maintain musculoskeletal

function and reduce pain [14, 16, 17]. Combining a weight loss programme with exercise therapy may help overweight and obese elders with knee OA to achieve a 10% loss of total body weight as well as safely relieve knee OA symptoms [3]. Also, a recent RCT which included older adults has shown that a non-surgical treatment programme had longer-lasting beneficial effects, evidenced by a delayed requirement for elective total knee replacement (TKR) surgery in a secondary health care setting [20]. Moreover, for those who are eligible for unilateral TKR, non-surgical intervention may delay their surgical intervention for several months [21]. There are no systematic literature reviews synthesising the evidence of the effectiveness of combining physical activity and dietary restriction interventions on the musculoskeletal function of overweight and obese elders with knee OA.

The aim of this review was to evaluate the effectiveness of combined physical activity and dietary restriction programmes on the musculoskeletal function of overweight and obese elders with BMI  $\geq 25 \text{ kg.m}^{-2}$ , aged  $\geq 55$  years of age, and with radiographic evidence of knee OA.

### **Objective**

To evaluate the effectiveness of combined physical activity and dietary restriction programmes on the musculoskeletal function of overweight and obese elders with knee OA.

## **METHODS**

### **Protocol and registration**

A systematic review was conducted according to a pre-defined protocol following the Preferred Reporting Items for Systematic Reviews and Meta-Analyses (PRISMA)-P guidelines [22] and the Cochrane handbook [23]. The review was registered on PROSPERO on 1/4/2015 (CDR42015019088), and is reported in accordance with the PRISMA statement [22].

### **Eligibility criteria**

#### **Inclusion criteria**

- Older adults (aged  $\geq 55$  years, men and women).
- Overweight or obese with body mass index (BMI)  $\geq 25 \text{ Kg.m}^{-2}$  [3].
- Radiographic evidence of tibiofemoral OA (unilateral or bilateral), grade I-III (mild to moderate) [24].

#### **Exclusion criteria**

- Full article not written in English.

#### **Studies**

Randomised controlled trials.

#### **Interventions**

Combined physical activity and dietary restriction programmes.

#### **Comparators**

Usual care (constituting non-intervention care e.g. advice or intervention care which may include; physical activity alone, dietary restriction alone) or exercise (participants received an exercise programme similar to the intervention group).

### **Outcome measures**

Primary outcome measures: body weight, BMI, musculoskeletal function, (including: mobility, joint range of motion (ROM) and muscle strength).

Secondary outcome measures: pain and QoL.

### **Information sources**

The search employed sensitive, topic-based strategies designed for each database (to 10<sup>th</sup> December 2015):

- The Cochrane Library: Controlled Trials Register, NHS Economic Evaluation Database.
- CINAHL, EMBASE, MEDLINE, WEB OF SCIENCE.
- Hand searches in key journals and lists of references.
- Unpublished research and grey literature such as Open Grey.
- Government, Official, Organizational such as UK department of health, World Health Organization and NHS (UK).
- Clinical trials registration, theses abstracts and Google scholar.

### **Search**

Search strategies of predefined search terms were developed and tested for applicability (ASA, and a specialist librarian from the University of Birmingham on 13<sup>th</sup> February 2015). The definitive search strategy was run by two independent researchers (ASA/AMK, 10<sup>th</sup> December 2015). Endnote software was used for data management. Search results were imported and duplicates were removed. An example of the Medline Ovid search strategy is presented in Table 1 (supplementary file 1).

### **Study selection**

The eligibility of included studies was independently assessed by two reviewers (ASA/AMK) according to the eligibility criteria. The reviewers screened the results of the search by titles and abstracts, and then full text. A study was considered to be eligible when both reviewers assessed the full text independently and found it to fulfil the eligibility criteria. A third reviewer (CAG) mediated in the case of disagreement. The inter-rater agreement was evaluated using Cohen's Kappa measure [25].

### **Data collection**

Using a standardised form (developed by ASA) based on the Cochrane Consumers and Communication Review Group's data extraction template [26], two reviewers (ASA/AMK) extracted data independently. A third reviewer (CAG) checked for consistency and clarity.

### **Data items**

Items reported on the data extraction form for each trial included demographic information, methodology, intervention details and all specified reported outcomes.

### **Risk of bias in individual trials**

The internal validity of each included trial was assessed using the Cochrane risk of bias assessment tool [27] recommended by PRISMA [22]. All domains of the risk of bias tool were assessed independently by two reviewers (ASA/CAG). A third reviewer (ABR) mediated in the case of disagreement.

### **Risk of bias across trials**

Risk of bias was considered high if the proportion of information from trials with high risk of bias was sufficient to affect the interpretation of the results. Risk of bias was considered unclear if most information was from studies with a low or unclear risk of bias, and low if most information was from studies with a low risk of bias [27].

### **Summary measures**

Following data extraction, meta-analysis was possible for one key outcome measure across trials that applied similar interventions and compared with exercise at one assessment time-point (6 months). Meta-analysis was conducted using RevMan to assess the effectiveness of a combined intervention programme of diet and exercise on mobility (6-minute walk test at 6 months) using the random effects model [28, 29]. Ninety-five percent confidence intervals were reported for the summary statistics and the standard deviation was calculated from the standard errors and confidence interval [30, 31]. Data for the other outcomes were available, but meta-analyses were not possible due to different assessment points or comparators. A modified narrative synthesis was used to present these data [32, 33].

### **Synthesis of results**

A mixed method analysis was required to synthesise the available data [28-33]. For the meta-analysis, no raw data were available, and therefore data analyses were conducted on the final summary statistics reports. Standard deviations were estimated from reported SE and CI for all available data [29]. Heterogeneity in treatment effects was considered by computation of  $I^2$ . An analysis of the quality of the interventions was undertaken as the basis for interpretation of heterogeneity [29, 30]. For the modified narrative synthesis, change scores were used for trials when no other data were available [29-31]. Two stages of a narrative synthesis were possible to apply; these comprised the development of a preliminary synthesis of findings of included trials, and an exploration of the relationships within and between trials [32, 33].

#### **Developing a preliminary synthesis**

A preliminary synthesis was developed using tabulation, textual description, grouping and clusters and data transformation. Tables were designed presenting the main characteristics of the eligible studies including eligibility criteria, intervention (number of participants, goal of weight loss, intervention period, setting, and brief information about exercise and diet intervention), comparator, outcome measures and the main findings. Additional tables were used to organise studies with respect to specific outcome measures (primary or secondary) and the comparator group. Results were presented as mean (SD) by converting the continuous data from standard errors or confidence intervals to SD [32, 33].

#### **Exploring the relationships within and between trials**

A visual representation of the relationship between study characteristics and results was used to explore the relationships within and between trials [32, 33].

### **Additional analyses**

Grading the quality of evidence approach was used to evaluate the quality of evidence included in the meta-analysis [34, 35]. The Grading of Recommendation, Assessment, Development, and Evaluation (GRADE) software [36] was used to evaluate the quality of evidence included in the meta-analysis. This approach provided a system for rating the quality of evidence and determining the strength of recommendations for clinical practice guidelines [34, 35]. It has five components: risk of bias, inconsistency, indirectness, imprecision and publication bias. Quality of evidence was categorised as 'high', 'moderate',

1  
2  
3 'low' and 'very low' [34, 35]. Each RCT evaluated as 'high' quality evidence was modified  
4 according to five negative and two positive factors [34, 35]. The Cochrane risk of bias  
5 assessment tool was used for this component [27]. According to the software risk of bias was  
6 classified as not-serious, serious or very serious. The quality of evidence was downgraded by  
7 one level if there was a serious limitation or by two levels if the limitation was very serious  
8 [34, 35]. Inconsistency was evaluated according to  $I^2$  statistics. It may be considered low if  $I^2$   
9  $<40\%$ , moderate if  $I^2= 30-60\%$ , substantial if  $I^2= 50-90\%$  and considerable if  $I^2=75-100\%$   
10 [35]. Inconsistency was considered as unserious if the reviewers were able to identify a  
11 plausible explanation for the heterogeneity and the quality of evidence was not downgraded  
12 [35]. Otherwise, the quality of evidence was downgraded by one or two levels if  
13 inconsistency of the results was classified as serious or very serious [35]. The quality of  
14 evidence was downgraded by one or two levels if there was indirectness between the study  
15 question and the applicability of the evidence [34]. Imprecision of evidence was downgraded  
16 in the presence of the following conditions: First, when the boundaries of the CI crossed the  
17 no effect line (threshold is completely within the recommended effect) and second, when the  
18 criteria for optimal information size (OIS) were not met [35]. The criterion for OIS was that  
19 the total number of participants included in a systematic review (calculated from a meta-  
20 analysis) was less than the number of participants generated by a conventional sample size  
21 calculation for a single adequately powered trial. Imprecision was downgraded by one level if  
22 one of these conditions was not met or by two levels if both conditions were not met [34, 35].  
23 Publication of bias was undetectable or strongly suspected according to GRADE software  
24 [36]. The selective outcome reporting domain of the Cochrane risk of bias assessment tool  
25 was used to evaluate the publication bias [27, 35]. The quality of evidence was downgraded  
26 by one level if the selective outcome reporting domain was evaluated as unclear without  
27 justification or downgraded by two levels if evaluated as high [35].  
28  
29  
30  
31

## 32 RESULTS

### 33 Study selection

34 Three RCTs ( $n= 794$ ) were included. One was a pilot trial [37] and two were definitive trials:  
35 the Arthritis, Diet and Activity Promotion Trial (ADAPT) [38] and the Intensive Diet and  
36 Exercise for Arthritis (IDEA) [3]. For the ADAPT trial, there was a main trial report, and two  
37 additional articles with further analyses of additional outcome measures [39, 40]. The trials  
38 used two comparators: An exercise programme in the pilot study and IDEA trial [3, 37],  
39 while usual care (healthy lifestyle) was the comparator in ADAPT [38]. All of the included  
40 trials were conducted by the same group from the USA and published in English. No relevant  
41 unpublished studies were identified. The inter-rater agreement of the study selection process  
42 was excellent with  $k= 0.82$  [25]. There was one disagreement requiring consultation with the  
43 third reviewer (CAG) who was asked to clarify the eligibility of articles reporting the same  
44 trials. Specifically, one pilot study by Messier et al., (2000) [37] did not clarify whether it  
45 was an external or internal pilot study. The senior author was contacted twice but no response  
46 was received. The third reviewer recommended it be treated as an external pilot study as there  
47 was nothing to indicate it was an internal pilot study in the article reporting the main trial  
48 (Messier et al., 2004) [38]. The study flow diagram is presented in Figure 1.  
49  
50  
51  
52  
53  
54  
55  
56  
57  
58  
59  
60



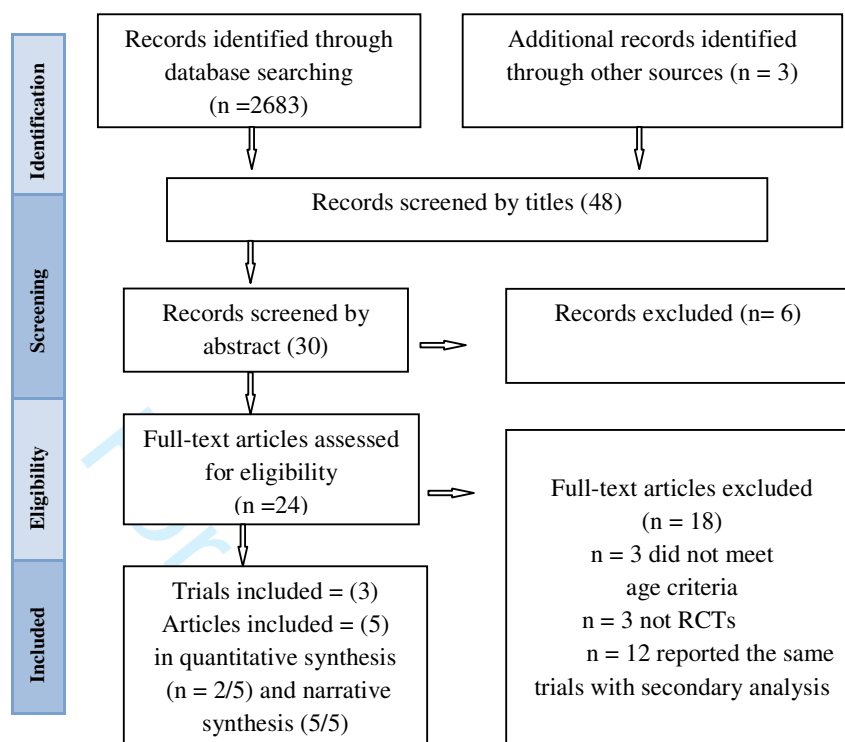

27 **Figure1: Study selection flow diagram [22].**

### 30 **Study characteristics**

31 The main characteristics of the included trials are presented in Table 2

32  
33  
34  
35  
36  
37  
38  
39  
40  
41  
42  
43  
44  
45  
46  
47  
48  
49  
50  
51  
52  
53  
54  
55  
56  
57  
58  
59  
60

Table 2: Descriptive data for the included trials

| Title/Author/year                                                                                                | Aim                                                                                                                                                                                                                                                                                                              | Eligibility criteria                                                                                                                                                                                                                                                                                                                                                                                                                                                                                                                                                        | Methods                                                                                                                                                                                                                                                                                                                                                                                                                                                                                                                                                                                                                                  | Comparator               | Outcome measures                                                                                                                                                                                                                                                                                                                                                                                                                                                                                                                                                                   | Assessment points                          | Result                                                                                                                                                                                                                                                                                                                                                                                                                                                                                                                                                                                                                                                                                                                                                                                                                                                                                                                                                                            |
|------------------------------------------------------------------------------------------------------------------|------------------------------------------------------------------------------------------------------------------------------------------------------------------------------------------------------------------------------------------------------------------------------------------------------------------|-----------------------------------------------------------------------------------------------------------------------------------------------------------------------------------------------------------------------------------------------------------------------------------------------------------------------------------------------------------------------------------------------------------------------------------------------------------------------------------------------------------------------------------------------------------------------------|------------------------------------------------------------------------------------------------------------------------------------------------------------------------------------------------------------------------------------------------------------------------------------------------------------------------------------------------------------------------------------------------------------------------------------------------------------------------------------------------------------------------------------------------------------------------------------------------------------------------------------------|--------------------------|------------------------------------------------------------------------------------------------------------------------------------------------------------------------------------------------------------------------------------------------------------------------------------------------------------------------------------------------------------------------------------------------------------------------------------------------------------------------------------------------------------------------------------------------------------------------------------|--------------------------------------------|-----------------------------------------------------------------------------------------------------------------------------------------------------------------------------------------------------------------------------------------------------------------------------------------------------------------------------------------------------------------------------------------------------------------------------------------------------------------------------------------------------------------------------------------------------------------------------------------------------------------------------------------------------------------------------------------------------------------------------------------------------------------------------------------------------------------------------------------------------------------------------------------------------------------------------------------------------------------------------------|
| Exercise and weight loss in obese older adults with knee OA: a preliminary study.<br>Messier et al., (2000) [37] | 1] To determine if a combined dietary and exercise intervention results in significant weight loss in older obese adults with knee OA<br>2] To compare the effects of exercise plus dietary therapy with exercise alone on gait, strength, knee pain, biomarkers of cartilage degradation, and physical function | <b>Inclusion</b><br>Aged $\geq 60$ years<br>Body mass index $\geq 28\text{kg.m}^2$<br>Knee pain, radiographic evidence of knee OA.<br>Self-reported physical disability<br><b>Exclusion</b><br>Serious medical condition affecting safety<br>Planned change of abode or admission to a nursing home within next 6 months. Unable to walk at least 420ft in 6 min without assistive device<br>Unable to walk on treadmill without assistive device<br>Current participation in an exercise programme or other study.<br>Unable to participate or complete the study protocol | <b>Participants</b><br>N=24 community-dwelling obese older adults<br><b>Goal of weight loss</b><br>15 lb (6.8 kg)<br><b>Period of intervention</b><br>6 months<br><b>Setting</b><br>University Health and Exercise Science Center, USA<br><b>Exercise</b><br>Combined weight training and walking program for 1 hour three times per week<br><b>Dietary intervention</b><br>Nutrition class 1 hour/week to instruct participants how to modify caloric intake utilising cognitive behaviour modification to change dietary habits to reach a group goal of an average weight loss then 3 group and one individual session held per month | Exercise group (control) | Body weight, self-report questionnaire, physical performance and gait analysis<br><br>Synovial fluid biomarkers (total sulphate proteoglycan (PG), keratan sulfate (KS) and interleukin-1 $\beta$ (IL-1))<br><br>Frequency and intensity of knee pain (Likert scale)<br><br>Disability by self-reported physical function using the Fitness Arthritis and Seniors Trial (FAST)<br><br>6 minute walk test and timed stair climbing to measure physical performance<br><br>Kinetics and kinematics analysis of gait using motion analysis and force plate recorded at 3 and 6 months | Data recorded at base line, 3 and 6 months | Body weight reduced significantly in diet plus exercise group compared with exercise group with (P=.007)<br><br>Within group differences:<br>The combined intervention group lost a mean of 18.8 lb (8.5 kg) at 6 months compared with 4.0 lb (1.8 kg) in the exercise group (P =.01)<br><br>No statistical differences were found between groups in self-reported performance measures of physical function and knee strength<br><br>Statistically significant improvement in both groups in self-reported disability and knee pain intensity and frequency and physical performance<br><br>At 6 months, the combined intervention group had a significantly greater loading rate (P =.03) and maximum braking force (P =.01) during gait<br><br>No statistical differences were found between groups in knee pain scores<br><br>Concentration level of keratan sulfate decreased similarly in both groups. The decrease in IL-1 correlated with joint pain (r = -0.77, P =.043) |

1  
2  
3  
4

| 5<br>6 Title/Author/<br>7 year                                                                                                                        | 8 Aim                                                                                                                                                                                                                                               | 9 Eligibility criteria                                                                                                                                                                                                                                                                                                                                                                                                                                                                                                                                                                                                                                                                                                           | 10 Methods                                                                                                                                                                                                                                                                                                                                                                                                                                                                                                                                                                                                                                                                                                                                                                                                                                                 | 11 Comparator                                                                                     | 12 Outcome measures                                                                                                                                                                                                                                                                                  | 13 Assessment points                          | 14 Result                                                                                                                                                                                                                                                                                                                                                                                                                                                                                                                                                                                                                                                                                                                                                                                                                       |
|-------------------------------------------------------------------------------------------------------------------------------------------------------|-----------------------------------------------------------------------------------------------------------------------------------------------------------------------------------------------------------------------------------------------------|----------------------------------------------------------------------------------------------------------------------------------------------------------------------------------------------------------------------------------------------------------------------------------------------------------------------------------------------------------------------------------------------------------------------------------------------------------------------------------------------------------------------------------------------------------------------------------------------------------------------------------------------------------------------------------------------------------------------------------|------------------------------------------------------------------------------------------------------------------------------------------------------------------------------------------------------------------------------------------------------------------------------------------------------------------------------------------------------------------------------------------------------------------------------------------------------------------------------------------------------------------------------------------------------------------------------------------------------------------------------------------------------------------------------------------------------------------------------------------------------------------------------------------------------------------------------------------------------------|---------------------------------------------------------------------------------------------------|------------------------------------------------------------------------------------------------------------------------------------------------------------------------------------------------------------------------------------------------------------------------------------------------------|-----------------------------------------------|---------------------------------------------------------------------------------------------------------------------------------------------------------------------------------------------------------------------------------------------------------------------------------------------------------------------------------------------------------------------------------------------------------------------------------------------------------------------------------------------------------------------------------------------------------------------------------------------------------------------------------------------------------------------------------------------------------------------------------------------------------------------------------------------------------------------------------|
| 15<br>16 <b>Exercise and Dietary Weight Loss in Overweight and Obese Older Adults With Knee Osteoarthritis</b><br>17 <b>Messier et al., 2004</b> [38] | 18 1) To determine whether long-term exercise and dietary weight loss are more effective, either separately or in combination, than usual care in improving physical function, pain, and mobility in older overweight and obese adults with knee OA | 19 <b>Inclusion</b><br>20 Aged $\geq 60$ years<br>21 BMI $\geq$ or $= 28$ kg/m <sup>2</sup> .<br>22 Knee pain, radiographic evidence of knee OA.<br>23 Self-reported physical disability<br>24 <b>Exclusion</b><br>25 Serious medical problem.<br>26 Mini mental state examination score of $< 24.3$<br>27 Inability to finish 18 months study<br>28 Inability to walk without assistive device.<br>29 Participation in another study<br>30 6-Reported alcohol consumption $> 14$ drinks per week<br>31 ST segment depression of at least 2 mm at an exercise level of 4 METS or less, hypotension, or complex arrhythmia during exercise<br>32 Inability to complete the study protocol due to frailty, illness or other reason | 33 <b>Participants</b><br>34 N=316 community-dwelling obese older adults<br>35 <b>Goal of weight loss</b><br>36 5% of the total body weight over 18 months<br>37 <b>Period of intervention</b><br>38 18 months<br>39 <b>Setting</b><br>40 The Claude D. Pepper Older Americans Independence Center, Wake Forest University, USA<br>41 <b>Exercise</b><br>42 1 hour 3 days/week consisted of an aerobic phase a resistance-training phase, a second aerobic phase, and a cool-down phase<br>43 <b>Dietary intervention</b><br>44 Based on principles from the group dynamics literature and social cognitive theory; divided into 3 phases: <b>Intensive</b> (months 1–4), <b>Transition</b> (months 5–6), and <b>maintenance</b> (months 7–18)<br>45 <b>Dietary weight loss plus exercise</b><br>46 Combined the exercise and dietary weight loss programs | 47 Usual care healthy life style (control)<br><br>Exercise group<br><br>Dietary weight loss group | 48 <b>Primary outcome</b><br>49 Self-reported physical function using the Western Ontario and McMaster Universities Osteoarthritis Index (WOMAC)<br>50 <b>Secondary outcomes</b><br>51 Weight loss, 6-minute walk distance, stair-climb time, WOMAC pain and stiffness scores, and joint space width | 52 Data recorded at baseline, 6 and 18 months | 53 Significant body weight loss in diet groups ( $P < 0.05$ ). Diet plus exercise and diet group lost an average of 5.7% and 4.9% of their body weight respectively with 1.2% for the healthy lifestyle group<br><br>54 Significant improvements in self-reported physical function ( $P < 0.05$ ), 6-minute walk distance ( $P < 0.05$ ), stair-climb time ( $P < 0.05$ ), and knee pain ( $P < 0.05$ ) in the diet plus exercise group compared with the healthy lifestyle group<br><br>55 Significant improvement in the 6-minute walk distance in the exercise group ( $P < 0.05$ ). The diet-only group was not significantly different from the healthy lifestyle group with respect to any of the functional or mobility measures<br><br>56 Changes in joint space width were not significantly different between groups |

35  
36  
37  
38  
39  
40  
41  
42  
43  
44  
45  
46  
47

1  
2  
3  
4  
5  
6  
7  
8  
9  
10  
11  
12  
13  
14  
15  
16  
17  
18  
19  
20  
21  
22  
23  
24  
25  
26  
27  
28  
29  
30  
31  
32  
33  
34  
35  
36  
37  
38  
39  
40  
41  
42  
43  
44  
45  
46  
47

| Title/Author/<br>year                                                                                                                                                                                                       | Aim                                                                                                                                                                            | Eligibility criteria                                                                                                                                                                                                                                                                                                                                                                                                                                                                                                                                                                                                                                                                                                                                                                                                                                                                                                                                                                                                                                                                                                                                      | Methods                                                                                                                                                                                                                                                                                                                                                                                                                                                                                                                                                                                                                                                                                                                                                                                                                                                                                                                                                                                                                                                                                                                                                                                                                                                                                                                                                                                                                           | Comparator                                                             | Outcome measures                                                                                                                                                                                                                                                                           | Assessment points                                              | Result                                                                                                                                                                                                                                                                                                                                                                                                                                                                                                                                                                                                                                                                                                                                                                                                                            |
|-----------------------------------------------------------------------------------------------------------------------------------------------------------------------------------------------------------------------------|--------------------------------------------------------------------------------------------------------------------------------------------------------------------------------|-----------------------------------------------------------------------------------------------------------------------------------------------------------------------------------------------------------------------------------------------------------------------------------------------------------------------------------------------------------------------------------------------------------------------------------------------------------------------------------------------------------------------------------------------------------------------------------------------------------------------------------------------------------------------------------------------------------------------------------------------------------------------------------------------------------------------------------------------------------------------------------------------------------------------------------------------------------------------------------------------------------------------------------------------------------------------------------------------------------------------------------------------------------|-----------------------------------------------------------------------------------------------------------------------------------------------------------------------------------------------------------------------------------------------------------------------------------------------------------------------------------------------------------------------------------------------------------------------------------------------------------------------------------------------------------------------------------------------------------------------------------------------------------------------------------------------------------------------------------------------------------------------------------------------------------------------------------------------------------------------------------------------------------------------------------------------------------------------------------------------------------------------------------------------------------------------------------------------------------------------------------------------------------------------------------------------------------------------------------------------------------------------------------------------------------------------------------------------------------------------------------------------------------------------------------------------------------------------------------|------------------------------------------------------------------------|--------------------------------------------------------------------------------------------------------------------------------------------------------------------------------------------------------------------------------------------------------------------------------------------|----------------------------------------------------------------|-----------------------------------------------------------------------------------------------------------------------------------------------------------------------------------------------------------------------------------------------------------------------------------------------------------------------------------------------------------------------------------------------------------------------------------------------------------------------------------------------------------------------------------------------------------------------------------------------------------------------------------------------------------------------------------------------------------------------------------------------------------------------------------------------------------------------------------|
| <p>Effects of Intensive Diet and Exercise on Knee Joint Loads, Inflammation and Clinical Outcomes among Overweight and Obese Adults With Knee OA is The IDEA Randomized Clinical Trial</p> <p>Messier et al., 2013) [3]</p> | <p>To determine whether a 10% reduction in body weight induced by diet, with or without exercise, would improve mechanistic and clinical outcomes more than exercise alone</p> | <p><b>Inclusion</b><br/>                     Aged ≥55 years<br/>                     Kellgren-Lawrence grade 2 or 3 (mild or moderate) radiographic tibiofemoral OA or tibiofemoral plus patellofemoral OA of one or both knees, pain on most days due to knee OA.<br/>                     BMI from 27 to 41<br/>                     Sedentary lifestyle (&lt;30 minutes per week of formal exercise for the past 6 months)<br/>                     Participants usual medications could be maintained or adjusted depending on physician advice</p> <p><b>Exclusion</b><br/>                     Significant co-morbid disease that would pose a safety threat or impair ability to participate, previous acute knee injury, patellofemoral OA in the absence of tibiofemoral OA<br/>                     Ability and willingness to modify dietary or exercise behaviours<br/>                     Excess alcohol use<br/>                     Inability to finish 18-month study or unlikely to be compliant<br/>                     Conditions that prohibit knee MRI<br/>                     Significant cognitive impairment or depression</p> | <p><b>Participants</b><br/>                     N=454</p> <p><b>Goal of weight loss</b><br/>                     10-15% of the total body weight</p> <p><b>Period of intervention</b><br/>                     18 months.</p> <p><b>Setting</b><br/>                     Wake Forest University and Wake Forest School of Medicine, USA</p> <p><b>Intensive Weight Loss Intervention</b><br/>                     The diet included up to 2 meal-replacement shakes per day. For the third meal, participants followed a weekly menu plan and recipes that were 500 to 750 kcal, low in fat, and high in vegetables. Daily caloric intake was adjusted according to the rate of weight change between intervention visits. The initial diet plan provided an energy-intake deficit of 800 to 1000 kcal.day<sup>-1</sup> as predicted by energy expenditure (estimated resting metabolism × 1.2 activity factor)</p> <p><b>The Exercise Intervention</b><br/>                     It was conducted for 1 hour on 3 days/week for 18 months. Participation was centre-based for the first 6 months. After 6-month follow-up testing and a 2-week transition phase, participants could remain in the facility program, opt for a home-based program, or combine that two. The program consisted of aerobic walking (15 minutes), strength training (20 minutes), a second aerobic phase (15 minutes), and cool-down (10 minutes)</p> | <p>Exercise group (control group)</p> <p>Dietary weight loss group</p> | <p><b>Primary outcomes</b><br/>                     Knee joint compressive force and plasma IL-6 concentration</p> <p><b>Secondary clinical outcomes</b><br/>                     Self-reported pain (range 0-20), function (range 0-68), mobility, and health-related quality of life</p> | <p>Participants were assessed at baseline, 6 and 18 months</p> | <p>Body weight was reduced significantly in both diet groups (diet and diet plus exercise) more than exercise group (P&lt;0.001)</p> <p>Within group differences:<br/>                     The diet plus exercise group lost about 10.6kg (11.4%), the diet group lost 8.9kg (9.5%) and 1.8kg (2.0%) of base line body weight</p> <p>No significant difference in walking speed and 6 minute walk test between groups</p> <p>Significant pain reduction was observed in the diet plus exercise group at 18 months compared with exercise group (mean score, 1.02; 95% CI, 0.33-1.71; P = .004)</p> <p>The difference in the SF-36 physical subscale was 2.81 units in diet plus exercise relative to exercise group (95% CI, -4.76 to -0.86; P = .005)</p> <p>No significant difference in the mental subscale between groups</p> |

## Methods

In the pilot trial by Messier et al., (2000) participants were randomised into two groups, a combined intervention and control group [37]. The control group received an exercise programme similar to the intervention group [37]. Messier et al., (2004) [38] randomised participants into four groups; combined intervention, exercise, diet and a control group. The control group received health education plus telephone contact to obtain information on pain, medication use, illness, and hospitalisation [38]. Messier et al., (2013) [3] randomised participants into three groups; combined intervention, diet group and exercise group. The exercise alone group was the control. Duration of the trial was six for the pilot trial [37] and eighteen months for ADAPT [38] and IDEA [3].

## Participants

All participants were community dwelling, obese older adults with radiographic evidence of knee OA. A total of 794 participants aged 55 years or older were randomised into the included studies. One hundred and fifty five participants were included in the meta-analysis.

## Interventions

The pilot trial [37] and two definitive trials [3, 38] were conducted by the same group from Wake Forest University, Winston-Salem, NC, USA. The goal of weight loss varied from 6.8kg over 6 months to 10-15% of total body weight over eighteen months of intervention. Outcomes were recorded at 3 time-points for the pilot trial (baseline, 3 months and 6 months) and for the two definitive trials (baseline, 6 months and eighteen months). Exercise duration and frequency were similar in all included trials (1 hour/ 3 times per week). Exercise types were aerobic exercise and resistance training. Principles from group dynamics and social-cognitive theory were used for behavioural treatment in the diet group in IDEA [3]. The diet sessions were graded from intensive (facilitating behavioural changes by using self-regulatory skills) to transition stage (assisting participants who not reached their weight loss goals in establishing new goals) and maintenance stage (assisting patients who had reached their weight loss goals to maintenance their weight loss). For the intensive weight loss trial the daily caloric intake was adjusted according to the rate of weight change between intervention visits (low fat and high vegetable diet). The initial diet plan provided an energy-intake deficit of 800 to 1000 Kcal.day<sup>-1</sup>, as predicted by an energy expenditure (estimated resting metabolism × 1.2 activity factor), of at least 1200kcal for men and 1100 for women [3].

## Primary outcomes

No primary outcomes were specified for the pilot trial. The ADAPT primary outcome was self-reported physical function measured using the Western Ontario and McMaster Universities Osteoarthritis Index (WOMAC) [38]. For the IDEA trial the primary outcomes were knee joint compressive force and plasma IL-6 concentration [3].

## Secondary and additional outcomes

Secondary outcomes included weight loss; physical performance measured using the 6-minute walk distance and stair climb time; synovial fluid analysis for levels of total proteoglycan, keratan sulfate, and interleukin-1 $\beta$ ; physical disability and knee pain by WOMAC pain and stiffness; joint stiffness and joint space. Biomechanical testing included kinetic and kinematic analysis of gait and isokinetic strength testing and quality of life (SF-36).

### Risk of bias within trials

Substantial inter-reviewer agreement was achieved on the risk of bias assessment ( $k= 0.73$ ) [25]. All of the included trials were evaluated as unclear risk of bias [27]. Most of the key domains were assessed as unclear risk of bias within each trial (Table 3).

**Table 3: Summary assessment of the overall risk of bias for each trial.**

| Study<br>(Author,<br>year) | Component of risk of bias |   |   |   |   |   | Summary<br>risk of<br>bias |
|----------------------------|---------------------------|---|---|---|---|---|----------------------------|
|                            | 1                         | 2 | 3 | 4 | 5 | 6 |                            |
| Messier et al.,<br>2000    | U                         | U | U | U | L | U | Unclear (5)<br>Low (1)     |
| Rejeski et al.,<br>2002    | U                         | U | U | L | L | U | Unclear (4)<br>Low (2)     |
| Messier et al.,<br>2004    | L                         | U | U | L | L | U | Unclear (3)<br>Low (3)     |
| Focht et al., 2005         | U                         | U | U | L | L | U | Unclear (4)<br>Low (2)     |
| Messier et al.,<br>2013    | L                         | U | U | L | L | U | Unclear (3)<br>Low (3)     |

### Risk of bias across trials

Risk of bias across trials was evaluated as unclear [27] only component 5 (selective outcome reporting) was evaluated as low risk of bias for all studies. For the 'blinding of participants, personnel and outcome assessor' component, all trials were evaluated as having unclear risk of bias as no strategies were reported to address the issue of outcome assessor unblinding. Also, for the 'other sources of bias' components, all trials were evaluated with unclear risk of bias due to unclear reporting.

### Results of individual trials and synthesis of results

#### Quantitative synthesis

Meta-analysis was possible for only one outcome measure at one assessment time-point. Meta-analysis was used to assess the effect of the combined intervention programme compared with exercise on the 6 minute walk test (metres) after 6 months of intervention. Only two trials [3, 37] with unclear risk of bias with  $n=155$  participants were available for meta-analysis. The pooled random effects (15.05, 95% CI -11.77 to 41.87) did not support a combined intervention effect (Figure 2).

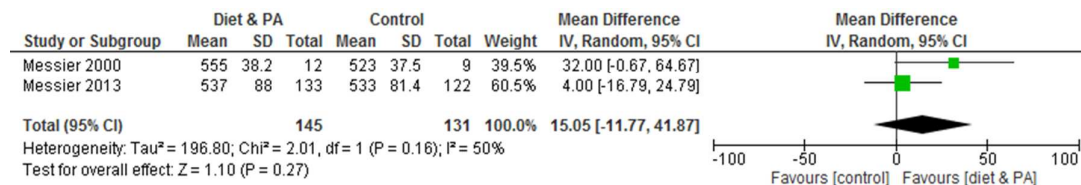

**Figure 2: 6 minute walk test (metres) at 6 months.**

## Synthesis of results

### Modified narrative synthesis

With respect to the guidelines for a narrative synthesis, only two elements were possible to apply; developing a preliminary synthesis and exploring the relationships within and between studies [32, 33].

### *Developing a preliminary synthesis*

Tabulation was used to present primary and secondary outcome measures that were not included in the meta-analysis; body weight, BMI, musculoskeletal function, (including; mobility, joint range of motion (ROM) and muscle strength) pain and QoL. Studies including a comparison of the combined intervention programme with an exercise intervention are presented in Tables 4-5 (supplementary files 2).

Tabulation was used to compare the effect of the combined intervention programme compared with usual care (healthy life style) on primary and secondary outcome measures; body weight, BMI, musculoskeletal function, (including; mobility, joint range of motion (ROM) and muscle strength) pain and QoL (Tables 6 &7) (supplementary files 3).

### *Exploring the relationships within and between studies*

Characteristics of the trials are presented in Table 2. All included trials were conducted by the same research group. The eligibility criteria were very similar across studies. The exercise intervention included strengthening and aerobic exercise. The intervention frequency (1 hour/3 times per week) was the same across the included trials. Further details about the design of the trials are presented above.

Tables 4 &6 show differences between the intervention group and the control group (despite the comparator) with respect to body weight and the 6 minute walk distance. These differences consistent with the results from the included trials. The diet plus exercise group in the pilot study [37] lost weight compared with the control group ( $p=0.01$ ) after 6 months of intervention [37] and this was also the case with respect to the longer duration intervention trial (18 months) in which the intervention group lost significantly ( $p<0.001$ ) more weight than the exercise group [3]. However, in ADAPT [38] both groups (intervention and healthy lifestyle) lost weight ( $p<0.05$ ) after 18 months of intervention [38] although there was a significant difference in the 6 minute walk result in favour of the diet plus exercise group ( $p<0.05$ ) [38]. Also, there was a significant difference ( $p=0.005$ ) in the 6 minute walk between the intervention and exercise groups in the IDEA trial [3].

### Additional analysis

No further analyses were possible owing to the lack of reported information and low number of included trials.

### Grading the quality of evidence

A summary assessment was undertaken to draw conclusions about the overall quality of evidence for the combined intervention on mobility using GRADE software [36]. Both trials included in the meta-analysis [3, 37] were evaluated as 'high' quality evidence before being downgraded as they were RCTs, before being modified according to five negative and two positive factors [34, 35]. The quality of evidence for a combined intervention programme of physical activity and diet on walking distance (metres) within 6 minutes after a period of 6 months of intervention was evaluated as moderate (Table 8).

**Table 8: Factors determining the quality of evidence according to GRADE**

| Factor              | Judgment    | Explanation                                                                                                                                                                                                                                                                                                                                                                                                                                                                                                                                                                                                         |
|---------------------|-------------|---------------------------------------------------------------------------------------------------------------------------------------------------------------------------------------------------------------------------------------------------------------------------------------------------------------------------------------------------------------------------------------------------------------------------------------------------------------------------------------------------------------------------------------------------------------------------------------------------------------------|
| 1. Risk of bias     | Not serious | <ul style="list-style-type: none"> <li>➤ Only two studies included in meta-analysis and both of them evaluated as unclear risk of bias.</li> <li>➤ No serious limitations to downgrade the quality of evidence.</li> <li>➤ Sequence generation was not reported in 1 study; allocation concealment not specified in both studies; no strategy reported to address issue of outcome assessor unblinding.</li> <li>➤ Incomplete outcome data evaluated as 'unclear' in the pilot study; no mention of missing data or methods used to address missing data; no primary outcome stated for the pilot study.</li> </ul> |
| 2. Inconsistency    | Not serious | <ul style="list-style-type: none"> <li>➤ <math>I^2=50\%</math>, which may be evaluated as either low or substantial heterogeneity; this overlap affects the decision making.</li> <li>➤ Magnitude of heterogeneity could be the result of high variability in the sample size and effect size which justifies the decision.</li> </ul>                                                                                                                                                                                                                                                                              |
| 3. Indirectness     | Not serious | <ul style="list-style-type: none"> <li>➤ Direct applicability of the included studies aims and objectives to their target populations, interventions and outcomes of interest.</li> </ul>                                                                                                                                                                                                                                                                                                                                                                                                                           |
| 4. Imprecision      | Serious     | <ul style="list-style-type: none"> <li>➤ Boundaries of CI crossing the no effect line which downgrades the quality of evidence by one level.</li> <li>➤ Number of participants needed for a single powered trial is higher than number of participants estimated from the meta-analysis; quality of evidence not downgraded on this basis.</li> </ul>                                                                                                                                                                                                                                                               |
| 5. Publication bias | Undetected  | <ul style="list-style-type: none"> <li>➤ Selective outcome reporting domain evaluated low in both studies; publication bias considered as not serious by two reviewers.</li> </ul>                                                                                                                                                                                                                                                                                                                                                                                                                                  |

## DISCUSSION

### Summary of evidence

This is the first systematic review and mixed methods analysis investigating the effectiveness of combining dietary restriction and physical activity interventions for musculoskeletal function in older overweight/ obese elders with knee OA. One pilot trial [37] and two definitive trials [3, 38] (794 participants) conducted by the same research group (Wake Forest University, Winston-Salem, NC, USA) were included. The intervention programme was compared with exercise training in one definitive trial (IDEA) [3] and the pilot trial [37], while usual care was the comparator in the ADAPT [38]. Two additional articles [39, 40] which reported further outcomes of the ADAPT were identified [38].

Data syntheses of this review were conducted using both meta-analysis and modified narrative synthesis. Although visual inspection of the tables of results indicated that the combined programme enhanced body weight reduction, and improved mobility, there was moderate evidence for no effect. Meta-analysis was possible for only the 6 minute walk test at 6 months and was not possible for the other outcome measures due to the inconsistency of assessment points or the comparator. The pooled random effect of two trials [3, 37] with 155 participants did not support the combined intervention program (15.05, 95% CI -11.77 to 41.87). Although the meta-analyses showed substantial heterogeneity  $I^2=50\%$ , this was classified as not serious using the GRADE evaluation tool [34, 35] as it was assessed as likely to be due to high variability in both the sample size and effect size. Clinical heterogeneity across trials was limited to comparator and duration. Overall the quality of



1  
2  
3 evidence was downgraded to moderate due to imprecision of the results according to GRADE  
4 [36]. All included trials were reported as having an unclear risk of bias which was mainly due  
5 to unclear reporting of some information [27]. For instance, both the 'blinding of participants,  
6 personnel and outcome assessor' and the 'other sources of bias' component were evaluated as  
7 unclear for all trials.  
8

9 Results from the trial by Messier et al., [37] indicated no statistically significant differences  
10 across groups with regard to self-reported performance measures of physical function, knee  
11 pain scores, knee strength and biomechanical measures (synovial fluid, keratan sulfate and  
12 level of IL-1) after 6 months of intervention. Findings from Messier et al., [38] indicated a  
13 statistically significant benefit of the combined intervention in terms of self-reported  
14 physical function, 6 minute walk test, stair climb and knee pain. The findings from Messier et  
15 al., [3] indicated a significant improvement in the 6 minute walk test and walking speed in the  
16 intervention group. Moreover, there was a significant reduction ( $p < 0.05$ ) of body weight  
17 among the intervention groups in all trials. In the current review the finding of no effect of a  
18 combined intervention programme may be due to the very low number of included trials (and  
19 participants) but probably is not due to low compliance. Compliance within each trial was  
20 good. For example, in the pilot study [37] compliance (ratio of the number of exercise  
21 sessions attended to the total number of the exercise sessions prescribed with the exercise  
22 programme) was 82.6% for the exercise group and 94.7% for diet plus exercise group. For  
23 the IDEA trial [3], 399/ 454 participants (88%) completed the study; compliance of the diet  
24 and exercise group was 70% at 6 months and 58% at 18 months with no adverse events and  
25 no significant difference between groups.  
26  
27

28 The cost-effectiveness of the combined intervention programme in overweight or obese  
29 elderly people with knee OA in the ADAPT [38] was reported by Servick et al., [41] which is  
30 not included in this review. The main findings showed that the intervention programme was  
31 considered as an expensive approach [41]. The minimal cost was 5460\$ for the diet plus  
32 exercise, 2415\$ for the diet and 2731\$ for the exercise group with a cost of \$24 for each  
33 percentage point improvement in subjective function, \$20 for each percentage point  
34 improvement in self-reported pain, and \$56 for each percentage point improvement in self-  
35 reported stiffness [41]. Cost of the intervention may increase in certain circumstances, for  
36 example, with disability, population suffering severe or complex medical conditions and even  
37 with transportation difficulty [41]. Despite the high cost of the intervention programme the  
38 required use of health services for the consequences of knee OA such as hospitalizations,  
39 nursing home care, home care, and medications may cost more [41].  
40  
41

42 In addition to diet and exercise two current trials MEDIC1 [21] and MEDIC2 [20] have  
43 reported that a multimodal approach of education, neuromuscular exercise, insoles and, if  
44 indicated, a dietary weight loss program and pain medication are effective for adults and  
45 older adults with moderate to severe knee OA. These studies were not included in this review  
46 due to the wide age range across participants. MEDIC 1 [21] included 9 participants and  
47 MEDIC2 [20] included 12 participants below the age of 55 years and there was no sub-group  
48 analysis of older participants. In MEDIC1 [21] the participants were eligible for total knee  
49 replacement (TKR) and were randomized to nonsurgical and surgical treatment followed by  
50 the intervention programme. Both interventions showed substantial improvement but the  
51 surgical treatment resulted in greater pain relief and functional improvement after 12 months  
52 compared with nonsurgical treatment alone. However, only 26% of the patients who were  
53 assigned to receive nonsurgical treatment alone underwent TKR in the following year [21]. In  
54 MEDIC2 [20] participants had radiographic confirmation of OA (Kellgren-Lawrence grade  
55  $\geq 1$ ), but were not eligible for a TKR. The 12-week non-surgical treatment program consisted  
56  
57

of individualized progressed neuromuscular exercise, patient education, insoles, dietary advice and prescription of pain medication if indicated, while usual care comprised two leaflets with information and advice on knee OA and recommended treatments. This nonsurgical treatment program was found to be more effective with respect to pain, activities of daily living and QoL at 12 months compared with usual care, although it was not possible to determine which of the components within this multi-intervention programme were most effective and whether the intervention as a whole would be equally effective in older OA patients [20].

The main limitation of this review is that only few eligible studies were identified. Thus, the optimal components of dietary and exercise interventions in terms of type, duration and quantity suitable for this population are still unclear. Future studies are required in this field to optimise outcome measures and methods of delivering a programme at an acceptable cost, prior to a future adequately powered definitive trial.

### **Conclusion**

This systematic review has shown that, based on current evidence from trials, a combined programme of diet and physical activity is not effective with respect to an improvement in body weight, BMI and musculoskeletal function. However the included number of trials and participants was low. The narrative synthesis suggests that interventions with a focus on reduction of body weight and/or improved mobility are worthy of further evaluation. Only moderate quality evidence was available to investigate the intervention programmes. An adequately powered RCT is required following work to optimise diet and exercise interventions using a multimodal approach.

### **Acknowledgement**

The authors would like to thank Lynn Harris, Library Services, University of Birmingham for her contribution to the development of the search strategies.

### **Contributorship statement**

ASA led the review and contributed to all stages, including development of the search strategy, running the searches, assessing trials eligibility, data extraction and synthesis (including risk of bias and GRADE analysis), and preparation of the manuscript. CAG and ABR provided expertise in systematic review methodology and risk of bias analysis. AMK assisted with assessment of eligibility of included studies and data extraction. All authors read and provided feedback on the preparation of this manuscript according to a PRISMA 2009 checklist and approved the final manuscript.

### **Competing interests**

There are no competing interests.

### **Funding**

This review is a part of a PhD program undertaken by ASA, and is fully funded by the King Saud University, Kingdom of Saudi Arabia, Riyadh and the Saudi Arabian Cultural Bureau, United Kingdom, London.

### **Data sharing statement**

There are no additional unpublished data from the review.

**REFERENCES**

1. Imamura M, Imamura ST, Kaziyama HH, et al. Impact of nervous system hyperalgesia on pain, disability, and quality of life in patients with knee osteoarthritis: a controlled analysis. *Arthritis Care Res* 2008;59(10):1424-1431.
2. Arthritis Foundation (2015) what is arthritis [online]. Available from: <http://www.arthritis.org/about-arthritis/understanding-arthritis/> [Accessed July 2016]
3. Messier SP, Mihalko SL, Legault C, et al. Effects of intensive diet and exercise on knee joint loads, inflammation, and clinical outcomes among overweight and obese adults with knee osteoarthritis: the IDEA randomized clinical trial. *JAMA* 2013;310(12):1263-1273.
4. Pouli N, Nair RD, Lincoln NB, et al. The experience of living with knee osteoarthritis: exploring illness and treatment beliefs through thematic analysis. *Disabil Rehabil* 2013;36 (7):600-607.
5. Arthritis Research UK (2013) Osteoarthritis in General Practice, Data and Perspectives [online]. Available from: <http://www.arthritisresearchuk.org/policy-and-public-affairs/reports-and-resources/reports.aspx> [Accessed July 2016]
6. Felson DT, Lawrence RC, Hochberg MC, et al. Osteoarthritis: new insights. Part 2: treatment approaches. *Ann Intern Med* 2000;133:726 –37.
7. Bhatia D, Bejarano T, & Novo M. Current interventions in the management of knee osteoarthritis. *J. Pharm. Bioall. Sci.* 2013;5(1):30.
8. Abbott JH, Robertson MC, Chapple C, et al. Manual therapy, exercise therapy, or both, in addition to usual care, for osteoarthritis of the hip or knee: a randomized controlled trial. 1: clinical effectiveness. *Osteoarthritis Cartilage* 2013;21(4):525-534.
9. DeJaco C, Singh YP, Perel P, et al. 2015 Recommendations for the management of polymyalgia rheumatica: a European League Against Rheumatism/American College of Rheumatology collaborative initiative. *Arthritis Rheumatol* 2015;67(10): 2569-2580.
10. Fernandes L, Hagen KB, Bijlsma JW, et al. EULAR recommendations for the non-pharmacological core management of hip and knee osteoarthritis. *Ann. Rheum. Dis* 2013;72(7):1125-1135.
11. McAlindon TE, Bannuru R, Sullivan MC, et al. OARSI guidelines for the non-surgical management of knee osteoarthritis. *Osteoarthritis Cartilage* 2014;22(3):363-388.
12. Coggon DI, Reading I, Croft P, et al. Knee osteoarthritis and obesity. *International journal of obesity and related metabolic disorders: journal of the International Association for the Study of Obesity* 2001;25(5):622-627.
13. Huang MH, Chen CH, Chen TW, et al. The effects of weight reduction on the rehabilitation of patients with knee osteoarthritis and obesity. *Arthritis Care Res* 2000;13(6):398-405.
14. Christensen R, Bartels EM, Astrup A, et al. Effect of weight reduction in obese patients diagnosed with knee osteoarthritis: a systematic review and meta-analysis. *Ann Rheum Dis* 2007;66(4):433-439.
15. Jadad AR, Moore RA, Carroll D, et al. Assessing the quality of reports of randomized clinical trials: is blinding necessary? *Control Clin Trials* 1996;17:1–12.
16. Messier SP. Diet and exercise for obese adults with knee osteoarthritis. *Clin. Geriatr. Med.* 2010;26(3):461-477.

17. Roddy E, Zhang W, & Doherty M. Aerobic walking or strengthening exercise for osteoarthritis of the knee? A systematic review. *Ann Rheum Dis* 2005;64(4):544-548.
18. Patrick DL, Ramsey SD, Spencer AC, et al. Economic evaluation of aquatic exercise for persons with osteoarthritis. *Med care* 2001;39(5):413-424.
19. Minor MA, Webel RR, Kay DR, et al. Efficacy of physical conditioning exercise in patients with rheumatoid arthritis and osteoarthritis. *Arthritis Rheum* 1989; 32(11):1396-1405.
20. Skou ST, Rasmussen S, Laursen MB, et al. The efficacy of 12 weeks non-surgical treatment for patients not eligible for total knee replacement: a randomized controlled trial with 1-year follow-up. *Osteoarthritis Cartilage* 2015;23(9):1465-1475.
21. Skou ST, Roos EM, Laursen MB, et al. A randomized, controlled trial of total knee replacement. *N. Engl. J. Med.* 2015;373(17):1597-1606.
22. Moher D, Liberati A, Tetzlaff J, et al. Preferred reporting items for systematic reviews and meta-analyses: the PRISMA statement. *Ann. Intern. Med.* 2009;151(4):264-269.
23. Higgins JPT, Green S, eds. Cochrane Handbook for Systematic Reviews of Interventions Version 5.1.0. The Cochrane Collaboration 2011. Available from: <http://www.cochrane-handbook.org/> [Accessed July 2016].
24. Brandt KD, Fife RS, Braunstein EM, et al. Radiographic grading of the severity of knee osteoarthritis: relation of the Kellgren and Lawrence grade to a grade based on joint space narrowing, and correlation with arthroscopic evidence of articular cartilage degeneration. *Arthritis Rheum* 1991;34(11):1381-1386.
25. Hsu LM, & Field R. Interrater agreement measures: Comments on Kappan, Cohen's Kappa, Scott's  $\pi$ , and Aickin's  $\alpha$ . *Understand Stat* 2003;2(3):205-219.
26. Consumers and Communication Group resources for authors; Data Extraction Template (word format). Available from: <http://cccr.org/cochrane.org/author-resources>. [Accessed July 2016].
27. Higgins JP, Altman DG, Gøtzsche PC, et al. The Cochrane Collaboration's tool for assessing risk of bias in randomised trials. *BMJ* 2011;343:d5928.
28. Green S, Higgins JP, eds. Chapter 2: Preparing a cochrane review. In: Higgins JP, Green S, eds. Cochrane Handbook for Systematic Reviews of Interventions Version 5.1.0. Available from: [http://handbook.cochrane.org/chapter\\_2/2\\_preparing\\_a\\_cochrane\\_review.htm](http://handbook.cochrane.org/chapter_2/2_preparing_a_cochrane_review.htm) [Accessed July 2016].
29. DerSimonian R, Laird N. Meta-analyses in clinical trials. *Control Clin Trials* 1986; 7:177e88.
30. Centre for Reviews and Dissemination [CRD]. Systematic Reviews: CRD's Guidance for Undertaking Reviews in Healthcare. 3rd edn. CRD University of York, York Publishing Services Ltd, York, 2009. Available from: [https://www.york.ac.uk/media/crd/Systematic\\_Reviews.pdf](https://www.york.ac.uk/media/crd/Systematic_Reviews.pdf). [Accessed July 2016].
31. Deeks JJ, Higgins JP, Altman DG, eds. Chapter 9: Analyzing data and undertaking meta-analyses. In: Higgins JP, Green S, eds. Cochrane Handbook for Systematic Reviews of Interventions Version 5.1.0. Available from: [http://handbook.cochrane.org/chapter\\_9/9\\_8\\_chapter\\_information.htm](http://handbook.cochrane.org/chapter_9/9_8_chapter_information.htm).

1  
2  
3 [Accessed July 2016].

- 4 32. Rodgers M, Arai L, Britten N, et al. Guidance on the conduct of narrative synthesis in  
5 systematic reviews: a comparison of guidance-led narrative synthesis versus meta-  
6 analysis. *In 14th Cochrane Colloquium 2006*: 23-26.
- 7 33. Popay J, Roberts H, Sowden A, et al. Guidance on the conduct of narrative synthesis in  
8 systematic reviews. *ESRC methods programme 2006*;15(1):047-71.
- 9 34. Guyatt GH, Oxman AD, Kunz R, et al. GRADE guidelines 6. Rating the quality of  
10 evidence—imprecision. *J. clin. Epidemiol.* 2011;64(12):1283-1293.
- 11 35. Schünemann H, Brozek J, & Oxman A. GRADE handbook for grading quality of  
12 evidence and strength of recommendation. The GRADE Working Group 2009.  
13 Available from:<http://gdt.guidelinedevelopment.org/app/handbook/handbook.html>.  
14 [Acceded July 2016].
- 15 36. Grading quality of evidence and strength of recommendations. [www.grade.pro](http://www.grade.pro)  
16 [Accessed July 2016].
- 17 37. Messier SP, Loeser RF, Mitchell MN, et al. Exercise and weight loss in obese older  
18 adults with knee osteoarthritis: a preliminary study. *J Am Geriatr Soc*  
19 2000;48(9):1062-1072.
- 20 38. Messier S, Loeser RF, Miller GD, et al. Exercise and dietary weight loss in overweight  
21 and obese older adults with knee osteoarthritis: the Arthritis, Diet, and Activity  
22 Promotion Trial. *Arthritis Rheum* 2004;50(5):1501-1510.
- 23 39. Rejeski WJ, Focht BC, Messier SP, et al. Obese, older adults with knee osteoarthritis:  
24 weight loss, exercise, and quality of life. *Health Psychol* 2002;21(5):419.
- 25 40. Focht BC, Rejeski WJ, Ambrosius WT, et al. Exercise, self-efficacy, and mobility  
26 performance in overweight and obese older adults with knee osteoarthritis. *Arthrit*  
27 *Care Res* 2005;53(5):659-665.
- 28 41. Sevick MA, Miller GD, Loeser RF, et al. Cost-effectiveness of exercise and diet in  
29 overweight and obese adults with knee osteoarthritis. *Med Sci Sports Exerc*  
30 2009;41(6):1167-1174.
- 31 42. Cheon EY. The effects of a self-management program on physical function and quality  
32 of life of patients with knee osteoarthritis. *Taehan Kanho Hakhoe Chi* 2005;35(3):514-  
33 525.
- 34 43. Atukorala I, Makovey J, Lawler L, et al. Is there a dose response relationship between  
35 weight loss and symptom improvement in persons with symptomatic knee  
36 osteoarthritis? *Osteoarthritis Cartilage* 2014;22:S50-S51.
- 37  
38  
39  
40  
41  
42  
43  
44  
45  
46  
47  
48  
49  
50  
51  
52  
53  
54  
55  
56  
57  
58  
59  
60

**Table 1: Example of Medline Ovid search strategy 1948- 10<sup>th</sup> December 2015**

| #  | Searches                                                                                                                                                                                              |
|----|-------------------------------------------------------------------------------------------------------------------------------------------------------------------------------------------------------|
| 1  | Physical activity/                                                                                                                                                                                    |
| 2  | Physical* adj2 (activity or training or therapy*)                                                                                                                                                     |
| 3  | (Exercis* or rehabilitation* or treatment*)                                                                                                                                                           |
| 4  | (Closed kinetic chain* or open kinetic chain* or isokinetic* or isometric* or anaerobic* or muscle* or stretching* or aerobic* or isotonic* or treadmill* or endurance* or walking*) adj1 (exercise*) |
| 5  | (Resist* adj2 (exercise* or therapy or training))                                                                                                                                                     |
| 6  | 1 or 2 or 3 or 4 or 5                                                                                                                                                                                 |
| 7  | Dietary restriction .mp.                                                                                                                                                                              |
| 8  | Meal replacement.mp.                                                                                                                                                                                  |
| 9  | Weight loss/ or weight loss.mp. or intentional weight loss.mp.                                                                                                                                        |
| 10 | Caloric Restriction/ or Obesity/ or Body Weight/ or hypo or hypochloric diet/                                                                                                                         |
| 11 | Energy intake/ or adipos*/ or Body Mass Index/ or Overweight/                                                                                                                                         |
| 12 | Diet/ or Diet, Carbohydrate-Restricted/ or Diet, Reducing/ or Diet Therapy/ or Diet, Vegetarian/                                                                                                      |
| 13 | Obesity/ or obesity.mp.                                                                                                                                                                               |
| 14 | (( Low carbohydrate* or low calor* or low fat* or vegetarian*) adj1 (diet*))                                                                                                                          |
| 15 | (Diet adj2 (therapy* or treatment*))                                                                                                                                                                  |
| 16 | 7 or 8 or 9 or 10 or 11 or 12 or 13 or 14 or 15                                                                                                                                                       |
| 17 | Aging/                                                                                                                                                                                                |
| 18 | Exp aged/                                                                                                                                                                                             |
| 19 | (55 adj2 (year* or age* or old*))                                                                                                                                                                     |
| 20 | (old* adj (adult* or people or person* or population* or men or women))                                                                                                                               |
| 21 | (aging* adj (adult* or people or person* or population* or men or women))                                                                                                                             |
| 22 | (elder* or senior* or geriatric* or ?enarian or ageing)                                                                                                                                               |
| 23 | (age* or aging or old* or elder*) adj1 (musc*)                                                                                                                                                        |
| 24 | 17 or 18 or 19 or 20 or 21 or 22 or 23                                                                                                                                                                |
| 25 | Pain/ or Knee Joint/ or Knee pain.mp. or Osteoarthritis, knee/                                                                                                                                        |
| 26 | Knee osteoarthritis.mp. or Osteoarthritis, knee/                                                                                                                                                      |
| 27 | (Knee* adj (arthritis or osteoarthritis* or inflammation* or degeneration* or disease or pain*))                                                                                                      |
| 28 | (radiographic* or symptomatic* or clinical* adj1 (knee osteoarthritis*))                                                                                                                              |

|    |                                                                        |
|----|------------------------------------------------------------------------|
| 29 | 25 or 26 or 27 or 28                                                   |
| 30 | Musculoskeletal function .mp.                                          |
| 31 | Muscle function .mp.                                                   |
| 32 | Body composition/                                                      |
| 33 | Mobility.mp.                                                           |
| 34 | (Gait or walking) adj1 (speed)                                         |
| 35 | Functional ability.mp.                                                 |
| 36 | “Activity of daily” living/ or .mp.                                    |
| 37 | “Quality of life”/                                                     |
| 38 | Balance.mp.                                                            |
| 39 | (musculoskeletal adj2( pain or disorder* ))                            |
| 40 | (Musc* adj (power or strength or performance or function or weakness)) |
| 41 | 41. 30 or 31 or 32 or 33 or 34 or 35 or 36 or 37 or 38 or 39 or 40     |
| 42 | 6 and 16 and 24 and 29 and 41                                          |

**Table 4: Preliminary synthesis for the primary outcome measures at baseline and after intervention; body weight, knee ROM, physical function and mobility comparing the combined intervention programme with an exercise intervention**

| Category          | Outcome measure                         | Assessment point | Study                | Intervention group |     |              |     | Control group |     |              |     |
|-------------------|-----------------------------------------|------------------|----------------------|--------------------|-----|--------------|-----|---------------|-----|--------------|-----|
|                   |                                         |                  |                      | M0 (SD0)           | N0  | M1 (SD1)     | N1  | M0 (SD0)      | N0  | M1 (SD1)     | N1  |
| Body weight       | Body weight (kg)                        | 6 months         | Messier et al., 2000 | 91 (13)            | 13  | 82.5 (4)     | 12  | 109 (17)      | 11  | 107.2 (15)   | 9   |
|                   |                                         | 6 months         | Messier et al., 2013 | 93 (14.7)          | 152 | 84.3 (14.7)  | 133 | 92.3 (14.6)   | 150 | 92.4 (15.4)  | 122 |
|                   |                                         | 18 months        | Messier et al., 2013 | 93 (14.7)          | 152 | 82.4 (15.2)  | 121 | 92.3 (14.6)   | 150 | 90.5 (15)    | 115 |
| Knee ROM          | ROM                                     | 6 months         | Messier et al., 2000 | 55.27* (N/A)       | 13  | 56.47 (0.91) | 12  | 55.27* (N/A)  | 11  | 56.73 (1.02) | 9   |
|                   | Estimated Concentric extension (Degree) | 6 months         | Messier et al., 2000 | 30.7 (N/A)         | 13  | 31 (N/A)     | 12  | 30.7 (N/A)    | 11  | 33.4 (N/A)   | 9   |
|                   | Estimated Concentric flexion            | 6 months         | Messier et al., 2000 | 18.2 (N/A)         | 13  | 18.5 (N/A)   | 12  | 18.2 (N/A)    | 11  | 20.8 (N/A)   | 9   |
| Physical function | Physical function (WOMAC)               | 18 months        | Messier et al., 2013 | 24.6 (11.7)        | 152 | 14.2 (10.4)  | 121 | 23.1 (10.3)   | 150 | 17.6 (9.8)   | 115 |
| Mobility          | 6 min walk test (meters)                | 18 months        | Messier et al., 2013 | 467 (87.9)         | 152 | 537 (92.6)   | 121 | 480 (90.3)    | 150 | 525 (79.2)   | 115 |
|                   | Stair climb (seconds)                   | 6 months         | Messier et al., 2000 | 9.81*              | 13  | 7.4 (0.32)   | 12  | 9.81*         | 11  | 8.7 (0.36)   | 9   |

Abbreviations: M0 (SD0)= Mean and standard deviation at baseline, N0= Participants number at baseline, M1 (SD1)= Mean and standard deviation after intervention, N1= Participants number after intervention, N/A= Data not available.



**Table 5: Preliminary synthesis for the secondary outcome measures at baseline and after intervention; pain and QoL comparing the combined intervention programme with an exercise intervention**

| Category | Outcome measure          | Assessment point | Study                | Intervention group |     |            |     | Control group |     |            |     |
|----------|--------------------------|------------------|----------------------|--------------------|-----|------------|-----|---------------|-----|------------|-----|
|          |                          |                  |                      | M0 (SD0)           | N0  | M1 (SD1)   | N1  | M0 (SD0)      | N0  | M1 (SD1)   | N1  |
| Pain     | WOMAC pain               | 6 months         | Messier et al., 2013 | 6.7 (3.4)          | 152 | 4.6 (2.9)  | 133 | 6.1 (2.9)     | 150 | 4.5 (3)    | 122 |
|          | WOMAC pain               | 18 months        | Messier et al., 2013 | 6.7 (3.4)          | 152 | 3.7 (3.1)  | 121 | 6.1 (2.9)     | 150 | 4.4 (2.7)  | 115 |
| QoL      | SF-36 Physical component | 6 months         | Messier et al., 2013 | 36.6 (9.41)        | 152 | 43.5 (9)   | 133 | 36.8 (9)      | 150 | 41.5 (9)   | 122 |
|          | SF-36 Mental component   | 6 months         | Messier et al., 2013 | 57.2 (6.6)         | 152 | 56.9 (7.3) | 133 | 56.5 (8.4)    | 150 | 56.1 (7.6) | 122 |
|          | SF-36 Physical component | 18 months        | Messier et al., 2013 | 36.6 (9.41)        | 152 | 44.7 (8.7) | 121 | 36.8 (9)      | 150 | 42.0 (9)   | 115 |
|          | SF-36 Mental component   | 18 months        | Messier et al., 2013 | 57.2 (6.6)         | 152 | 56.1 (6.5) | 121 | 56.5 (8.4)    | 150 | 55.4 (7.6) | 115 |

Abbreviations: M0 (SD0)= Mean and standard deviation at baseline, N0= Participants number at baseline, M1 (SD1)= Mean and standard deviation after intervention, N1= Participants number after intervention, N/A= Data not available.

**Table 6: Preliminary synthesis for the primary outcome measures at baseline and after intervention; body weight, physical function and mobility comparing the combined intervention programme with usual care**

| Category          | Outcome measure           | Assessment point | Study                | Intervention group |     |              |     | Control group |     |               |     |
|-------------------|---------------------------|------------------|----------------------|--------------------|-----|--------------|-----|---------------|-----|---------------|-----|
|                   |                           |                  |                      | M0 (SD0)           | N0  | M1 (SD1)     | N1  | M0 (SD0)      | N0  | M1 (SD1)      | N1  |
| Body weight       | Body weight (kg)          | 18 months        | Messier et al., 2004 | 92 (1.7)           | 76  | 86.8 (N/A)   | 58  | 96 (1.8)      | 78  | 94.9 (N/A)    | 67  |
| Physical function | Physical function (WOMAC) | 6 months         | Messier et al., 2004 | 23.6 (12.2)        | 76  | 17.9* (N/A)  | 63  | 26 (11.4)     | 78  | 22.4* (N/A)   | 70  |
|                   | Physical function (WOMAC) | 18 months        | Messier et al., 2004 | 23.6 (12.2)        | 76  | 29.3* (N/A)  | 58  | 26 (11.4)     | 78  | 29.4 (N/A)    | 67  |
| Mobility          | 6 min walk test (meters)  | 6 months         | Messier et al., 2004 | 416.2 (98.7)       | 76  | 482.3 (100)  | 63  | 434.6 (96.4)  | 78  | 429 (108)     | 70  |
|                   | 6 min walk test (meters)  | 18 months        | Messier et al., 2004 | 416.2 (98.7)       | 76  | 477.8 (99.7) | 58  | 434.6 (96.4)  | 78  | 429.9 (104.7) | 67  |
|                   | 6 min walk test (meters)  | 18 months        | Focht et al., 2005   | 414.5 (85.3)       | N/A | 465 (96.3)   | N/A | 433.4 (81.9)  | N/A | 430 (79.5)    | N/A |
|                   | Stair climb (seconds)     | 6 months         | Messier et al., 2004 | 10.9 (5.8)         | 76  | 8.8 (6.2)    | 63  | 9.5 (5.6)     | 78  | 9.9 (6.3)     | 70  |
|                   | Stair climb (seconds)     | 18 months        | Focht et al., 2005   | 10.4 (7.3)         | N/A | 8.9 (5.4)    | NA  | 9.4 (4.9)     | N/A | 9.9 (5.6)     | N/A |

\*Estimated value from Figure 2 in Messier et al., 2004.

Abbreviations: M0 (SD0)= Mean and standard deviation at baseline, N0= Participants number at baseline, M1 (SD1)= Mean and standard deviation after intervention, N1= Participants number after intervention, N/A= Data not available.

**Table 7: Preliminary synthesis for the secondary outcome measures at baseline and after intervention; pain and QoL comparing the combined intervention programme with usual care**

| Category | Outcome measure          | Assessment point           | Study                | Intervention group |    |              |     | Control group |    |              |     |
|----------|--------------------------|----------------------------|----------------------|--------------------|----|--------------|-----|---------------|----|--------------|-----|
|          |                          |                            |                      | M0 (SD0)           | N0 | M1 (SD1)     | N1  | M0 (SD0)      | N0 | M1 (SD1)     | N1  |
| Pain     | Pain scale (WOMAC)       | 6 months                   | Messier et al., 2004 | 7.3 (3.6)          | 76 | 5.5 (3.7)    | 63  | 7.3 (3.4)     | 78 | 6.2 (3.9)    | 70  |
|          | Pain scale (WOMAC)       | 18 months                  | Messier et al., 2004 | 7.3 (3.6)          | 76 | 5.1 (3.6)    | 58  | 7.3 (3.4)     | 78 | 6 (3.7)      | 67  |
| QoL      | SF-36 Physical component | Average of 6 and 18 months | Rejeski et al. 2002  | 35.39 (10.5)       | 68 | 40.57 (N/A)* | N/A | 33.60 (8.4)   | 68 | 34.41 (N/A)* | N/A |
|          | SF-36 Mental component   | Average of 6 and 18 months | Rejeski et al. 2002  | 52.85 (10.7)       | 68 | 53.31 (N/A)* | N/A | 52.70 (10.9)  | 68 | 53.51 (N/A)* | N/A |

Abbreviations: M0 (SD0)= Mean and standard deviation at baseline, N0= Participants number at baseline, M1 (SD1)= Mean and standard deviation after intervention, N1= Participants number after intervention, N/A= Data not available, \*= only SEM data available; SD1 data could not be calculated due to missing N1 value.

1  
2  
3  
4 **Effect of physical activity and dietary restriction interventions on the musculoskeletal**  
5 **function of overweight and obese elders with knee osteoarthritis: protocol for a**  
6 **systematic review**  
7

8 *Asma Alrushud, Alison Rushton, Carolyn Anne Greig*  
9

---

10  
11  
12 **Citation**

13 Asma Alrushud, Alison Rushton, Carolyn Anne Greig. **Effect of physical activity and dietary restriction**  
14 **interventions on the musculoskeletal function of overweight and obese elders with knee**  
15 **osteoarthritis: protocol for a systematic review.**  
16

17 **Review question(s)**

18 What is the effect of combined physical activity and dietary restriction programmes on the musculoskeletal  
19 function of overweight and obese elders with knee osteoarthritis?  
20

21 **Searches**

22 Cochrane databases Ovid (MEDLINE), EMBASE Web of science and CINAHL will be searched with a  
23 search strategy comprising comprehensive keyword combinations for each of the concepts of interest: 1)  
24 knee osteoarthritis, 2) physical activity, 3) dietary restriction, 4) ageing 5) musculoskeletal function. There  
25 will be no language, publication status or publication year limitations.  
26

27 **Types of study to be included**

28 Randomised control trials.

29 **Condition or domain being studied**

30 Musculoskeletal function of overweight and obese elders with knee osteoarthritis.

31 **Participants/ population**

32 Older men or women aged  $\geq 55$  years with BMI  $\geq 25$  Kg/m<sup>2</sup> and diagnosed (radiographically) with either  
33 unilateral or bilateral knee osteoarthritis.

34 **Intervention(s), exposure(s)**

35 Physical activity combined with dietary restriction programmes.

36 **Comparator(s)/ control**

37 Usual care.

38 Usual care may constitute non intervention e.g. advice, or an intervention which may include physical  
39 activity alone or dietary restriction alone.  
40

41 **Outcome(s)**

42 Body weight, Body Mass Index, musculoskeletal function (mobility, knee range of movement, muscle  
43 strength), pain and quality of life.

44 **Data extraction, (selection and coding)**

45 A customised data extraction form including: demographic information, methodology, interventions details  
46 and all specified reported outcomes has been designed and will be used by the reviewers. Two reviewers  
47 will independently extract data. The accuracy and clarity of the extracted data will be checked by a third  
48 reviewer.  
49

50 **Risk of bias (quality) assessment**

51 The Cochrane risk of bias assessment tool will be used to appraise the internal validity of each included  
52 trial. All domains of the bias tool will be assessed independently. The blinding domain will be divided into 2  
53 items, one for the blinding of participants and personnel and the other for blinding of the outcome  
54 assessors. Two independent reviewers will assess the risk of bias and in case of disagreement a third  
55 reviewer will be consulted.  
56

57 **Strategy for data synthesis**

58 Data synthesis is anticipated to be narrative based on a scoping search of the literature.  
59  
60

If possible, a meta-analysis will be conducted (if included trials are of sufficient number, with comparable interventions and outcomes, and of acceptable risk of bias).

#### **Analysis of subgroups or subsets**

Not anticipated.

#### **Dissemination plans**

A poster of progress will be presented in MRC Arthritis Research UK Centre for Musculoskeletal Ageing Research (CMAR/CIMA) Conference on 15th – 16th April and the University of Birmingham's Research Poster Conference on 16<sup>th</sup> June 2015. After completing the work, an article will be submitted for publication in peer reviewed journal.

#### **Contact details for further information**

Corresponding author: Alrushud AS, [asa314@student.bham.ac.uk](mailto:asa314@student.bham.ac.uk)

Emails: [c.a.greig@bham.ac.uk](mailto:c.a.greig@bham.ac.uk); [a.b.rushton@bham.ac.uk](mailto:a.b.rushton@bham.ac.uk)

Telephone [+44 \(0\)121 414 8743](tel:+44(0)1214148743)

#### **Organisational affiliation of the review**

School of Sport, Exercise and Rehabilitation Sciences, College of Life and Environmental Sciences, University of Birmingham, Edgbaston, Birmingham, B15 2TT, UK

#### **Review team**

Ms Asma Alrushud,

Dr Alison Rushton,

Dr Carolyn Greig,

#### **Anticipated or actual start date**

1 November 2014

#### **Anticipated completion date**

30 April 2015

#### **Funding sources/sponsors**

This review is a part of a PhD program undertaken by Alrushud, and is fully funded by the King Saud University, Kingdom of Saudi Arabia, Riyadh and the Saudi Arabian Cultural Bureau, United Kingdom, London.

#### **Conflicts of interest**

None.

#### **Language**

English

#### **Country**

United Kingdom

#### **Subject index terms status**

Subject indexing assigned by CRD

#### **Subject index terms**

Knee osteoarthritis, elders, overweight, obese, musculoskeletal function, dietary restriction, physical activity.

#### **Stage of review**

Continuous.

#### **Date of registration in PROSPERO**

31 March 2015

#### **Date of publication of this revision**

Not applicable

#### **Stage of review at time of this submission**

|                                                                 | <b>Started</b> | <b>Completed</b> |
|-----------------------------------------------------------------|----------------|------------------|
| Preliminary searches                                            | Yes            | Yes              |
| Piloting of the study selection process                         | Yes            | Yes              |
| Formal screening of search results against eligibility criteria | Yes            | Yes              |
| Data extraction                                                 | Yes            | No               |

1  
2  
3  
4  
5  
6  
7  
8  
9  
10  
11  
12  
13  
14  
15  
16  
17  
18  
19  
20  
21  
22  
23  
24  
25  
26  
27  
28  
29  
30  
31  
32  
33  
34  
35  
36  
37  
38  
39  
40  
41  
42  
43  
44  
45  
46  
47  
48  
49  
50  
51  
52  
53  
54  
55  
56  
57  
58  
59  
60

Risk of bias (quality) assessment

Yes No

Data analysis

No No

For peer review only

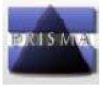

# PRISMA 2009 Checklist

1  
2  
3  
4  
5  
6  
7  
8  
9  
10  
11  
12  
13  
14  
15  
16  
17  
18  
19  
20  
21  
22  
23  
24  
25  
26  
27  
28  
29  
30  
31  
32  
33  
34  
35  
36  
37  
38  
39  
40  
41  
42  
43  
44  
45  
46  
47

|  |  |  |  |
|--|--|--|--|
|  |  |  |  |
|  |  |  |  |
|  |  |  |  |
|  |  |  |  |
|  |  |  |  |
|  |  |  |  |
|  |  |  |  |
|  |  |  |  |
|  |  |  |  |
|  |  |  |  |
|  |  |  |  |
|  |  |  |  |
|  |  |  |  |
|  |  |  |  |
|  |  |  |  |
|  |  |  |  |
|  |  |  |  |
|  |  |  |  |
|  |  |  |  |
|  |  |  |  |
|  |  |  |  |
|  |  |  |  |
|  |  |  |  |
|  |  |  |  |
|  |  |  |  |
|  |  |  |  |
|  |  |  |  |
|  |  |  |  |
|  |  |  |  |
|  |  |  |  |
|  |  |  |  |
|  |  |  |  |
|  |  |  |  |
|  |  |  |  |

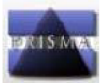

# PRISMA 2009 Checklist

1  
2  
3  
4  
5  
6  
7  
8  
9  
10  
11  
12  
13  
14  
15  
16  
17  
18  
19  
20  
21  
22  
23  
24  
25  
26  
27  
28  
29  
30  
31  
32  
33  
34  
35  
36  
37  
38  
39  
40  
41  
42  
43  
44  
45  
46  
47

|  |  |  |  |
|--|--|--|--|
|  |  |  |  |
|  |  |  |  |
|  |  |  |  |
|  |  |  |  |
|  |  |  |  |
|  |  |  |  |
|  |  |  |  |
|  |  |  |  |
|  |  |  |  |
|  |  |  |  |
|  |  |  |  |
|  |  |  |  |
|  |  |  |  |
|  |  |  |  |
|  |  |  |  |
|  |  |  |  |
|  |  |  |  |
|  |  |  |  |
|  |  |  |  |
|  |  |  |  |
|  |  |  |  |
|  |  |  |  |

---



# BMJ Open

## The effect of physical activity and dietary restriction interventions on weight loss and the musculoskeletal function of overweight and obese elders with knee osteoarthritis: a systematic review and mixed method data synthesis

|                                 |                                                                                                                                                                                                                                                                                                                                                                                                                                                                                                                                                                                                                                                                                                                                                                                    |
|---------------------------------|------------------------------------------------------------------------------------------------------------------------------------------------------------------------------------------------------------------------------------------------------------------------------------------------------------------------------------------------------------------------------------------------------------------------------------------------------------------------------------------------------------------------------------------------------------------------------------------------------------------------------------------------------------------------------------------------------------------------------------------------------------------------------------|
| Journal:                        | <i>BMJ Open</i>                                                                                                                                                                                                                                                                                                                                                                                                                                                                                                                                                                                                                                                                                                                                                                    |
| Manuscript ID                   | bmjopen-2016-014537.R1                                                                                                                                                                                                                                                                                                                                                                                                                                                                                                                                                                                                                                                                                                                                                             |
| Article Type:                   | Research                                                                                                                                                                                                                                                                                                                                                                                                                                                                                                                                                                                                                                                                                                                                                                           |
| Date Submitted by the Author:   | 20-Feb-2017                                                                                                                                                                                                                                                                                                                                                                                                                                                                                                                                                                                                                                                                                                                                                                        |
| Complete List of Authors:       | Alrushud, Asma; School of Sport, Exercise and Rehabilitation Sciences, University of Birmingham, Edgbaston, Birmingham, B15 2TT, UK<br>Rushton, Alison; School of Sport, Exercise and Rehabilitation Sciences, University of Birmingham, Edgbaston, Birmingham, B15 2TT, UK; MRC-Arthritis Research UK Centre for Musculoskeletal Ageing Research<br>Kanavaki, Archontissa; School of Sport, Exercise and Rehabilitation Sciences, University of Birmingham, Edgbaston, Birmingham, B15 2TT, UK; MRC-Arthritis Research UK Centre for Musculoskeletal Ageing Research<br>Greig, Carolyn; School of Sport, Exercise and Rehabilitation Sciences, University of Birmingham, Edgbaston, Birmingham, B15 2TT, UK; MRC-Arthritis Research UK Centre for Musculoskeletal Ageing Research |
| <b>Primary Subject Heading</b>: | Geriatric medicine                                                                                                                                                                                                                                                                                                                                                                                                                                                                                                                                                                                                                                                                                                                                                                 |
| Secondary Subject Heading:      | Sports and exercise medicine, Occupational and environmental medicine                                                                                                                                                                                                                                                                                                                                                                                                                                                                                                                                                                                                                                                                                                              |
| Keywords:                       | Rehabilitation medicine < INTERNAL MEDICINE, Knee < ORTHOPAEDIC & TRAUMA SURGERY, Musculoskeletal disorders < ORTHOPAEDIC & TRAUMA SURGERY                                                                                                                                                                                                                                                                                                                                                                                                                                                                                                                                                                                                                                         |
|                                 |                                                                                                                                                                                                                                                                                                                                                                                                                                                                                                                                                                                                                                                                                                                                                                                    |

SCHOLARONE™  
Manuscripts

1  
2  
3 **The effect of physical activity and dietary restriction interventions on**  
4 **weight loss and the musculoskeletal function of overweight and obese elders**  
5 **with knee osteoarthritis: a systematic review and mixed method data**  
6 **synthesis**  
7  
8

9  
10  
11 Asma S Alrushud<sup>1</sup>, Alison B Rushton<sup>1,2</sup>, Archontissa M Kanavaki<sup>1,2</sup> and Carolyn A Greig<sup>1,2</sup>.

12 <sup>1</sup>School of Sport, Exercise and Rehabilitation Sciences, <sup>2</sup>MRC-Arthritis Research UK Centre  
13 for Musculoskeletal Ageing Research, University of Birmingham, Edgbaston, Birmingham,  
14 B15 2TT, UK  
15

16  
17  
18  
19 **Corresponding author**

20 Asma S Alrushud, School of Sport, Exercise and Rehabilitation Sciences, University of  
21 Birmingham, Edgbaston, Birmingham BH15 2TT.

22 **Email:** [asa314@student.bham.ac.uk](mailto:asa314@student.bham.ac.uk)

23 **Telephone number:** +44 121 414 8743  
24

25  
26 **Keywords**

27 Exercise, diet, elderly, obesity, randomised controlled trials  
28

29  
30 **Word count**

31 4,591  
32

33 Number of figures: 2  
34

35 Number of tables: 8 within the text  
36

37 Number of references: 50  
38

39 Number of supplementary files 4 (SR protocol, PRISMA 2009 checklist, cover letter, BMJ  
40 response letter).  
41  
42  
43  
44  
45  
46  
47  
48  
49  
50  
51  
52  
53  
54  
55  
56  
57  
58  
59  
60

**ABSTRACT****Background**

Despite the clinical recommendation of exercise and diet for people with knee osteoarthritis (OA) there are no systematic reviews synthesising the effectiveness of combining physical activity and dietary restriction interventions on the musculoskeletal function of overweight and obese elders with knee OA.

**Objective**

To evaluate the effectiveness of combined physical activity and dietary restriction programmes on body weight, body mass index (BMI) and the musculoskeletal function of overweight and obese elders with knee OA.

**Information sources**

A detailed search strategy was applied to key electronic databases (Ovid, Embase, Web of Science and CINAHL) for randomised controlled trials (RCTs) published in English prior to 15<sup>th</sup> January 2017.

**Participants**

Participants with BMI  $\geq 25 \text{ kg.m}^{-2}$ , aged  $\geq 55$  years of age and radiographic evidence of knee OA.

**Interventions**

Physical activity plus dietary restriction programmes with usual care or exercise as the comparators.

**Outcome measures**

Primary outcome measures were body weight, BMI, or musculoskeletal function. Secondary outcome measures were pain and quality of life (QoL).

**Results**

One pilot and two definitive trials with  $n=794$  participants were included. Two articles reporting additional data and outcome measures for one of the RCTs were identified. All included RCTs had an unclear risk of bias. Meta-analysis was only possible to evaluate mobility (6 min walk test) at 6 months and the pooled random effect 15.05 (95% CI -11.77 to 41.87) across 2 trials with  $n=155$  participants did not support the combined intervention programme. Narrative synthesis showed clear differences in favour of a reduced body weight and an increased 6 minute walk in the intervention group compared with control groups.

**Conclusion**

The quality of evidence of benefit of combining exercise and dietary interventions in older overweight/ obese adults with knee OA is unclear. Protocol was registered in PROSPERO (CRD42015019088).

**Article summary****Strengths and limitations of the review**

- This is the first systematic review of combined physical activity and dietary restriction interventions in overweight and obese older adults with knee OA.
- The protocol of this review was registered in PROSPERO and followed the PRISMA guidelines and the Cochrane handbook; GRADE was used to evaluate the quality of the included trials.
- The review included a mixed methods analytical approach.
- Few eligible studies were identified however important information is highlighted which could inform clinical practice.

## INTRODUCTION

### Rational

Current evidence shows that the burden of chronic musculoskeletal conditions especially osteoarthritis (OA) increases with advancing age [1]. OA is the most common type of arthritis affecting older adults. It is a degenerative joint disease that may affect any joint within the body causing chronic pain, functional limitation and emotional disturbance, and may lead to disability and negatively affect quality of life (QoL) [2-5]. Knee OA is a common condition in older adults affecting about 3.64% of the global population in 2010 [6, 7]. In the United Kingdom (UK) there is approximately 4.7 million older adults aged 45 years or over experiencing knee OA symptoms [1, 8]. In addition, more than 20 million people seek treatment for knee OA in the United States (US) [9, 10]. Given the increasing numbers of older adults in the population, combined with the increasing prevalence of obesity and being overweight throughout the population, it is anticipated that the incidence of knee OA will increase rapidly over the next decade [8].

Unfortunately there is no specific treatment for knee OA. Most recommendations describe three treatment modalities: non-pharmacological, pharmacological and surgical [11, 12]. Most knee OA evidence-based guidelines recommend nonsurgical treatment [13, 14] and most general practitioners prefer the non-pharmacological and non-surgical interventions as the first line of treatment (recognised as 'usual care') [11]. These interventions are focused on patient education, self-management, pain reduction, function and QoL improvement, body weight reduction and exercise (either land-based or water-based) [1, 14-17]. It is well known that obesity is an important risk factor for knee OA progression and several studies recommend obesity control for decreasing disease burden, since a decrease in body weight will lead to a reduction of joint load and inflammation [3, 14, 17, 18]. Weight reduction could be considered as a functional treatment in knee OA rehabilitation since a 12-15% reduction compared with initial body weight has been shown to improve function and reduce pain [19]. Moreover, the appropriate percentage of body weight reduction has been investigated in a systematic review and meta-analysis of five randomised control trials (RCTs) [20]. The review concluded that professional treatment of knee OA should include a weight reduction plan and patients should be encouraged to lose at least 5% of body weight over a 20-week period to achieve symptomatic relief [20].

In addition to weight reduction, clinical guidelines for knee OA management and level 1 evidence recommend exercise therapy as the main intervention [20-24]. Moderate intensity aerobic exercise (e.g. walking) is recommended to maintain musculoskeletal function and reduce pain [20-22]. However the optimal exercise prescription for older adults is still unclear and further research is required [7]. The demand for optimal exercise is increased in obese patients who may face more challenges and believe in the greater importance of physical activity compared with dietary intervention [25, 26].

Clinically combining a weight loss programme with exercise therapy may help overweight and obese elders with knee OA to achieve a 10% loss of total body weight as well as safely relieve knee OA symptoms [3]. Also, a recent RCT which included older adults has shown that a non-surgical treatment programme had longer-lasting beneficial effects, evidenced by a delayed requirement for elective total knee replacement (TKR) surgery in a secondary health care setting [27]. Moreover, for those who are eligible for unilateral TKR, non-surgical intervention may delay their surgical intervention for several months [28]. There are no systematic literature reviews synthesising the evidence of the effectiveness of combining

1  
2  
3 physical activity and dietary restriction interventions on the musculoskeletal function of  
4 overweight and obese elders with knee OA.

5 The aim of this review was to evaluate the effectiveness of combined physical activity and  
6 dietary restriction programmes on the musculoskeletal function of overweight and obese  
7 elders with BMI  $\geq 25 \text{ kg.m}^{-2}$ , aged  $\geq 55$  years of age, and with radiographic evidence of knee  
8 OA.  
9

## 10 11 **Objective**

12 To evaluate the effectiveness of combined physical activity and dietary restriction  
13 programmes on body weight, BMI and the musculoskeletal function of overweight and obese  
14 elders with knee OA.  
15

## 16 17 **METHODS**

### 18 **Protocol and registration**

19 A systematic review was conducted according to a pre-defined protocol following the  
20 Preferred Reporting Items for Systematic Reviews and Meta-Analyses (PRISMA)-P  
21 guidelines [29] and the Cochrane handbook [30]. The review was registered on PROSPERO  
22 on 1/4/2015 (CRD42015019088), and is reported in accordance with the PRISMA statement  
23 [29].  
24  
25

### 26 **Eligibility criteria**

#### 27 Inclusion criteria

- 28 • Older adults (aged  $\geq 55$  years, men and women).
- 29 • Overweight or obese with BMI  $\geq 25 \text{ Kg.m}^{-2}$  [3].
- 30 • Radiographic evidence of tibiofemoral OA (unilateral or bilateral), grade I-III (mild to  
31 moderate) according to the Kellgren and Lawrence system for knee OA classification  
32 [31].  
33  
34

#### 35 Exclusion criteria

- 36 • Full article not written in English.  
37

#### 38 Studies

39 Randomised controlled trials.  
40

#### 41 Interventions

42 Combined physical activity and dietary restriction programmes.  
43

#### 44 Comparators

45 Usual care (including advice or physical activity alone or dietary restriction alone) or exercise  
46 (participants received an exercise programme similar to the intervention group).  
47  
48

### 49 **Outcome measures**

50 Primary outcome measures: Body weight, BMI, musculoskeletal function either self-reported  
51 function or objective functional performance measures, also, including: mobility, joint range  
52 of motion (ROM) and muscle strength.  
53

54 Secondary outcome measures: Pain and QoL.  
55  
56

### 57 **Information sources**

58  
59  
60

The search employed sensitive, topic-based strategies designed for each database (to 10<sup>th</sup> December 2015):

- The Cochrane Library: Controlled Trials Register, NHS Economic Evaluation Database.
- CINAHL, EMBASE, MEDLINE, WEB OF SCIENCE.
- Hand searches in key journals and lists of references.
- Unpublished research and grey literature such as Open Grey.
- Government, Official, Organizational such as UK department of health, World Health Organization and NHS (UK).
- Clinical trials registration, theses abstracts and Google scholar.

### Search

Search strategies of predefined search terms were developed and tested for applicability (ASA, and a specialist librarian from the University of Birmingham on 13<sup>th</sup> February 2015). The definitive search strategy was run by two independent researchers (ASA/AMK, 10<sup>th</sup> December 2015). Endnote X7 software was used for data management. Search results were imported and duplicates were removed. An example of the Medline Ovid search strategy is presented in Table 1. The search was updated on (15<sup>th</sup> January 2017) to include studies published in 2016 by (ASA/AMK) and no eligible studies were identified.

**Table 1: Example of Medline Ovid search strategy 1948- 10th December 2015**

| #  | Searches                                                                                                                                                                                              |
|----|-------------------------------------------------------------------------------------------------------------------------------------------------------------------------------------------------------|
| 1  | Physical activity/                                                                                                                                                                                    |
| 2  | Physical* adj2 (activity or training or therapy*)                                                                                                                                                     |
| 3  | (Exercis* or rehabilitation* or treatment*)                                                                                                                                                           |
| 4  | (Closed kinetic chain* or open kinetic chain* or isokinetic* or isometric* or anaerobic* or muscle* or stretching* or aerobic* or isotonic* or treadmill* or endurance* or walking*) adj1 (exercise*) |
| 5  | (Resist* adj2 (exercise* or therapy or training))                                                                                                                                                     |
| 6  | 1 or 2 or 3 or 4 or 5                                                                                                                                                                                 |
| 7  | Dietary restriction .mp.                                                                                                                                                                              |
| 8  | Meal replacement.mp.                                                                                                                                                                                  |
| 9  | Weight loss/ or weight loss.mp. or intentional weight loss.mp.                                                                                                                                        |
| 10 | Caloric Restriction/ or Obesity/ or Body Weight/ or hypo or hypochloric diet/                                                                                                                         |
| 11 | Energy intake/ or adipos*/ or Body Mass Index/ or Overweight/                                                                                                                                         |
| 12 | Diet/ or Diet, Carbohydrate-Restricted/ or Diet, Reducing/ or Diet Therapy/ or Diet, Vegetarian/                                                                                                      |
| 13 | Obesity/ or obesity.mp.                                                                                                                                                                               |
| 14 | ((Low carbohydrate* or low calor* or low fat* or vegetarian*) adj1 (diet*))                                                                                                                           |
| 15 | (Diet adj2 (therapy* or treatment*))                                                                                                                                                                  |
| 16 | 7 or 8 or 9 or 10 or 11 or 12 or 13 or 14 or 15                                                                                                                                                       |
| 17 | Aging/                                                                                                                                                                                                |
| 18 | Exp aged/                                                                                                                                                                                             |
| 19 | (55 adj2 (year* or age* or old*))                                                                                                                                                                     |
| 20 | (old* adj (adult* or people or person* or population* or men or women))                                                                                                                               |
| 21 | (aging* adj (adult* or people or person* or population* or men or women))                                                                                                                             |
| 22 | (elder* or senior* or geriatric* ?enarian or ageing)                                                                                                                                                  |

|    |                                                                                                  |
|----|--------------------------------------------------------------------------------------------------|
| 23 | (age* or aging or old* or elder*) adj1 (musc*)                                                   |
| 24 | 17 or 18 or 19 or 20 or 21 or 22 or 23                                                           |
| 25 | Pain/ or Knee Joint/ or Knee pain.mp. or Osteoarthritis, knee/                                   |
| 26 | Knee osteoarthritis.mp. or Osteoarthritis, knee/                                                 |
| 27 | (Knee* adj (arthritis or osteoarthritis* or inflammation* or degeneration* or disease or pain*)) |
| 28 | (radiographic* or symptomatic* or clinical* adj1 (knee osteoarthritis*))                         |
| 29 | 25 or 26 or 27 or 28                                                                             |
| 30 | Musculoskeletal function .mp.                                                                    |
| 31 | Muscle function .mp.                                                                             |
| 32 | Body composition/                                                                                |
| 33 | Mobility.mp.                                                                                     |
| 34 | (Gait or walking) adj1 (speed)                                                                   |
| 35 | Functional ability.mp.                                                                           |
| 36 | “Activity of daily” living/ or .mp.                                                              |
| 37 | “Quality of life”/                                                                               |
| 38 | Balance.mp.                                                                                      |
| 39 | (musculoskeletal adj2( pain or disorder* ))                                                      |
| 40 | (Musc* adj (power or strength or performance or function or weakness))                           |
| 41 | 41. 30 or 31 or 32 or 33 or 34 or 35 or 36 or 37 or 38 or 39 or 40                               |
| 42 | 6 and 16 and 24 and 29 and 41                                                                    |

### Study selection

The eligibility of included studies was independently assessed by two reviewers (ASA/AMK) according to the eligibility criteria. The reviewers screened the results of the search by titles and abstracts, and then full text. A study was considered to be eligible when both reviewers assessed the full text independently and found it to fulfil the eligibility criteria. A third reviewer (CAG) mediated in the case of disagreement. The inter-rater agreement was evaluated using Cohen’s Kappa measure [32].

### Data collection

Using a standardised form (developed by ASA) based on the Cochrane Consumers and Communication Review Group’s data extraction template [33], two reviewers (ASA/AMK) extracted data independently. A third reviewer (CAG) checked for consistency and clarity.

### Data items

Items reported on the data extraction form for each trial included demographic information, methodology, intervention details and all specified reported outcomes.

### Risk of bias in individual trials

The internal validity of each included trial was assessed using the Cochrane risk of bias assessment tool [34] recommended by PRISMA [29]. All domains of the risk of bias tool were assessed independently by two reviewers (ASA/CAG). A third reviewer (ABR) mediated in the case of disagreement.

### Risk of bias across trials

Risk of bias was considered high if the proportion of information from trials with high risk of bias was sufficient to affect the interpretation of the results. Risk of bias was considered

1  
2  
3 unclear if most information was from studies with a low or unclear risk of bias, and low if  
4 most information was from studies with a low risk of bias [34].  
5

### 6 7 **Summary measures**

8 Following data extraction, meta-analysis was possible for one key outcome measure across  
9 trials that applied similar interventions and compared with exercise at one assessment time-  
10 point (6 months). Meta-analysis was conducted using RevMan to assess the effectiveness of a  
11 combined intervention programme of diet and exercise on mobility (6-minute walk test at 6  
12 months) using the random effects model [35, 36]. Ninety-five percent confidence intervals  
13 were reported for the summary statistics and the standard deviation was calculated from the  
14 standard errors and confidence interval [37, 38]. Data for the other outcomes were available,  
15 but meta-analyses were not possible due to different assessment points or comparators. A  
16 modified narrative synthesis was used to present these data [39, 40].  
17

### 18 19 **Synthesis of results**

20 A mixed method analysis was required to synthesise the available data [35-40]. For the meta-  
21 analysis, no raw data were available, and therefore data analyses were conducted on the final  
22 summary statistics reports. Standard deviations were estimated from reported SE and CI for  
23 all available data [36]. Heterogeneity in treatment effects was considered by computation of  
24  $I^2$ . An analysis of the quality of the interventions was undertaken as the basis for  
25 interpretation of heterogeneity [36, 37]. For the modified narrative synthesis, change scores  
26 were used for trials when no other data were available [36-38]. Two stages of a narrative  
27 synthesis were possible to apply; these comprised the development of a preliminary synthesis  
28 of findings of included trials, and an exploration of the relationships within and between trials  
29 [39, 40].  
30

#### 31 32 **Developing a preliminary synthesis**

33 A preliminary synthesis was developed using tabulation, textual description, grouping and  
34 clusters and data transformation. Tables were designed presenting the main characteristics of  
35 the eligible studies including eligibility criteria, intervention (number of participants, goal of  
36 weight loss, intervention period, setting, and brief information about exercise and diet  
37 intervention), comparator, outcome measures and the main findings. Additional tables were  
38 used to organise studies with respect to specific outcome measures (primary or secondary)  
39 and the comparator group. Results were presented as mean (SD) by converting the continuous  
40 data from standard errors or confidence intervals to SD [39, 40].  
41

#### 42 43 **Exploring the relationships within and between trials**

44 A visual representation of the relationship between study characteristics and results was used  
45 to explore the relationships within and between trials [39, 40].  
46

### 47 48 **Additional analyses**

49 The Grading of Recommendation, Assessment, Development, and Evaluation (GRADE)  
50 approach was used to evaluate the quality of evidence included in the meta-analysis [41, 42].  
51 Specific software (GRADEpro) was used [43]. This approach provided a system for rating  
52 the quality of evidence and determining the strength of recommendations for clinical practice  
53 guidelines [41, 42]. It has five components: risk of bias, inconsistency, indirectness,  
54 imprecision and publication bias. Quality of evidence was categorised as 'high', 'moderate',  
55 'low' and 'very low' [41, 42]. Each RCT evaluated as 'high' quality evidence was modified  
56 according to five negative and two positive factors [41, 42].  
57  
58  
59  
60



1  
2  
3 The Cochrane risk of bias assessment tool was used for this component [34]. According to  
4 the software risk of bias was classified as not-serious, serious or very serious. The quality of  
5 evidence was downgraded by one level if there was a serious limitation or by two levels if the  
6 limitation was very serious [41, 42]. Inconsistency was evaluated according to  $I^2$  statistics. It  
7 may be considered low if  $I^2 < 40\%$ , moderate if  $I^2 = 30-60\%$ , substantial if  $I^2 = 50-90\%$  and  
8 considerable if  $I^2 = 75-100\%$  [42]. Inconsistency was considered as unserious if the reviewers  
9 were able to identify a plausible explanation for the heterogeneity and the quality of evidence  
10 was not downgraded [42]. Otherwise, the quality of evidence was downgraded by one or two  
11 levels if inconsistency of the results was classified as serious or very serious [42]. The quality  
12 of evidence was downgraded by one or two levels if there was indirectness between the study  
13 question and the applicability of the evidence [41].  
14  
15

16 Imprecision of evidence was downgraded in the presence of the following conditions: First,  
17 when the boundaries of the CI crossed the no effect line (threshold is completely within the  
18 recommended effect) and second, when the criteria for optimal information size (OIS) were  
19 not met [42]. The criterion for OIS was that the total number of participants included in a  
20 systematic review (calculated from a meta-analysis) was less than the number of participants  
21 generated by a conventional sample size calculation for a single adequately powered trial.  
22 Imprecision was downgraded by one level if one of these conditions was not met or by two  
23 levels if both conditions were not met [41, 42].  
24  
25

26 Publication of bias was undetectable or strongly suspected according to GRADE software  
27 [43]. The selective outcome reporting domain of the Cochrane risk of bias assessment tool  
28 was used to evaluate the publication bias [34, 42]. The quality of evidence was downgraded  
29 by one level if the selective outcome reporting domain was evaluated as unclear without  
30 justification or downgraded by two levels if evaluated as high [42].  
31  
32  
33  
34

## 35 RESULTS

### 36 Study selection

37 Three RCTs ( $n = 794$ ) were included. One was a pilot trial [44] and two were definitive trials:  
38 the Arthritis, Diet and Activity Promotion Trial (ADAPT) [45] and the Intensive Diet and  
39 Exercise for Arthritis (IDEA) [3]. For the ADAPT trial, there was a main trial report, and two  
40 additional articles with further analyses of additional outcome measures [46, 47]. The trials  
41 used two comparators: An exercise programme in the pilot study and IDEA trial [3, 44],  
42 while usual care (healthy lifestyle) was the comparator in ADAPT [45]. All of the included  
43 trials were conducted by the same group from the USA and published in English. No relevant  
44 unpublished studies were identified. The inter-rater agreement of the study selection process  
45 was excellent with  $k = 0.82$  [32]. There was one disagreement requiring consultation with the  
46 third reviewer (CAG) who was asked to clarify the eligibility of articles reporting the same  
47 trials. Specifically, one pilot study by Messier et al., (2000) [44] did not clarify whether it  
48 was an external or internal pilot study. The senior author was contacted twice but no response  
49 was received. The third reviewer recommended it be treated as an external pilot study as there  
50 was nothing to indicate it was an internal pilot study in the article reporting the main trial  
51 (Messier et al., 2004) [45]. The study flow diagram is presented in Figure1 [48].  
52  
53  
54  
55  
56  
57  
58  
59  
60

1  
2  
3  
4  
5  
6  
7  
8  
9  
10  
11  
12  
13  
14  
15  
16  
17  
18  
19  
20  
21  
22  
23  
24  
25  
26  
27  
28  
29  
30  
31  
32  
33  
34  
35  
36  
37  
38  
39  
40  
41  
42  
43  
44  
45  
46  
47  
48  
49  
50  
51  
52  
53  
54  
55  
56  
57  
58  
59  
60

**Study characteristics**

The main characteristics of the included trials are presented in Table 2.

For peer review only

Table 2: Descriptive data for the included trials

| Title/Author/year           | Aim                                                                                                                                                                                                                                                                                                                         | Eligibility criteria                                                                                                                                                                                                                                                                                                                                                                                                                                                                                                                                                                                                                                  | Methods                                                                                                                                                                                                                                                                                                                                                                                                                                                                                                                                                                                                                                                                                     | Comparator               | Outcome measures                                                                                                                                                                                                                                                                                                                                                                                                                                                                                                                                                                                    | Assessment points                          | Result                                                                                                                                                                                                                                                                                                                                                                                                                                                                                                                                                                                                                                                                                                                                                                                                                                                                                                                                                                                       |
|-----------------------------|-----------------------------------------------------------------------------------------------------------------------------------------------------------------------------------------------------------------------------------------------------------------------------------------------------------------------------|-------------------------------------------------------------------------------------------------------------------------------------------------------------------------------------------------------------------------------------------------------------------------------------------------------------------------------------------------------------------------------------------------------------------------------------------------------------------------------------------------------------------------------------------------------------------------------------------------------------------------------------------------------|---------------------------------------------------------------------------------------------------------------------------------------------------------------------------------------------------------------------------------------------------------------------------------------------------------------------------------------------------------------------------------------------------------------------------------------------------------------------------------------------------------------------------------------------------------------------------------------------------------------------------------------------------------------------------------------------|--------------------------|-----------------------------------------------------------------------------------------------------------------------------------------------------------------------------------------------------------------------------------------------------------------------------------------------------------------------------------------------------------------------------------------------------------------------------------------------------------------------------------------------------------------------------------------------------------------------------------------------------|--------------------------------------------|----------------------------------------------------------------------------------------------------------------------------------------------------------------------------------------------------------------------------------------------------------------------------------------------------------------------------------------------------------------------------------------------------------------------------------------------------------------------------------------------------------------------------------------------------------------------------------------------------------------------------------------------------------------------------------------------------------------------------------------------------------------------------------------------------------------------------------------------------------------------------------------------------------------------------------------------------------------------------------------------|
| Messier et al., (2000) [44] | <p>1] To determine if a combined dietary and exercise intervention results in significant weight loss in older obese adults with knee OA</p> <p>2] To compare the effects of exercise plus dietary therapy with exercise alone on gait, strength, knee pain, biomarkers of cartilage degradation, and physical function</p> | <p><b>Inclusion</b></p> <p>Aged <math>\geq 60</math> years</p> <p>Body mass index <math>\geq 28 \text{ kg.m}^{-2}</math></p> <p>Knee pain, radiographic evidence of knee OA.</p> <p>Self-reported physical disability</p> <p><b>Exclusion</b></p> <p>Serious medical condition affecting safety</p> <p>Planned change of abode or admission to a nursing home within next 6 months. Unable to walk at least 420ft in 6 min without assistive device</p> <p>Unable to walk on treadmill without assistive device</p> <p>Current participation in an exercise programme or other study.</p> <p>Unable to participate or complete the study protocol</p> | <p><b>Participants</b></p> <p>N=24 community-dwelling obese older adults</p> <p><b>Goal of weight loss</b></p> <p>15 lb (6.8 kg)</p> <p><b>Period of intervention</b></p> <p>6 months</p> <p><b>Setting</b></p> <p>University Health and Exercise Science Center, USA</p> <p><b>Exercise</b></p> <p>Combined weight training and walking program for 1 hour three times per week</p> <p><b>Dietary intervention</b></p> <p>Nutrition class 1 hour/week to instruct participants how to modify caloric intake utilising cognitive behaviour modification to change dietary habits to reach a group goal of an average weight loss then 3 group and one individual session held per month</p> | Exercise group (control) | <p>Body weight, self-report questionnaire, physical performance and gait analysis</p> <p>Synovial fluid biomarkers (total sulphate proteoglycan (PG), keratan sulfate (KS) and interleukin-1<math>\beta</math> (IL-1))</p> <p>Frequency and intensity of knee pain (Likert scale)</p> <p>Disability by self-reported physical function using the Fitness Arthritis and Seniors Trial (FAST)</p> <p>6 minute walk test and timed stair climbing to measure physical performance</p> <p>Kinetics and kinematics analysis of gait using motion analysis and force plate recorded at 3 and 6 months</p> | Data recorded at base line, 3 and 6 months | <p>Body weight reduced significantly in diet plus exercise group compared with exercise group with (P=.007)</p> <p>Within group differences:</p> <p>The combined intervention group lost a mean of 18.8 lb (8.5 kg) at 6 months compared with 4.0 lb (1.8 kg) in the exercise group (P =.01)</p> <p>No statistical differences were found between groups in self-reported performance measures of physical function and knee strength</p> <p>Statistically significant improvement in both groups in self-reported disability and knee pain intensity and frequency and physical performance</p> <p>At 6 months, the combined intervention group had a significantly greater loading rate (P =.03) and maximum braking force (P =.01) during gait</p> <p>No statistical differences were found between groups in knee pain scores</p> <p>Concentration level of keratan sulfate decreased similarly in both groups. The decrease in IL-1 correlated with joint pain (r = -0.77, P =.043)</p> |

1  
2  
3  
4

| Title/Author/<br>year                                                                                                         | Aim                                                                                                                                                                                                                                           | Eligibility criteria                                                                                                                                                                                                                                                                                                                                                                                                                                                                                                                                                                                                                                                                                                                                                    | Methods                                                                                                                                                                                                                                                                                                                                                                                                                                                                                                                                                                                                                                                                                                                                                                                                                                                | Comparator                                                                                     | Outcome measures                                                                                                                                                                                                                                                                                      | Assessment points                          | Result                                                                                                                                                                                                                                                                                                                                                                                                                                                                                                                                                                                                                                                                                                                                                                                                                                                                                             |
|-------------------------------------------------------------------------------------------------------------------------------|-----------------------------------------------------------------------------------------------------------------------------------------------------------------------------------------------------------------------------------------------|-------------------------------------------------------------------------------------------------------------------------------------------------------------------------------------------------------------------------------------------------------------------------------------------------------------------------------------------------------------------------------------------------------------------------------------------------------------------------------------------------------------------------------------------------------------------------------------------------------------------------------------------------------------------------------------------------------------------------------------------------------------------------|--------------------------------------------------------------------------------------------------------------------------------------------------------------------------------------------------------------------------------------------------------------------------------------------------------------------------------------------------------------------------------------------------------------------------------------------------------------------------------------------------------------------------------------------------------------------------------------------------------------------------------------------------------------------------------------------------------------------------------------------------------------------------------------------------------------------------------------------------------|------------------------------------------------------------------------------------------------|-------------------------------------------------------------------------------------------------------------------------------------------------------------------------------------------------------------------------------------------------------------------------------------------------------|--------------------------------------------|----------------------------------------------------------------------------------------------------------------------------------------------------------------------------------------------------------------------------------------------------------------------------------------------------------------------------------------------------------------------------------------------------------------------------------------------------------------------------------------------------------------------------------------------------------------------------------------------------------------------------------------------------------------------------------------------------------------------------------------------------------------------------------------------------------------------------------------------------------------------------------------------------|
| Exercise and Dietary Weight Loss in Overweight and Obese Older Adults with Knee Osteoarthritis<br>Messier et al., (2004) [45] | To determine whether long-term exercise and dietary weight loss are more effective, either separately or in combination, than usual care in improving physical function, pain, and mobility in older overweight and obese adults with knee OA | <p><b>Inclusion</b><br/>Aged <math>\geq 60</math> years<br/>BMI <math>\geq</math> or <math>= 28</math> kg/m<sup>2</sup>.<br/>Knee pain, radiographic evidence of knee OA.<br/>Self-reported physical disability</p> <p><b>Exclusion</b><br/>Serious medical problem.<br/>Mini mental state examination score of <math>&lt; 24.3</math><br/>Inability to finish 18 months study<br/>Inability to walk without assistive device.<br/>Participation in another study<br/>6-Reported alcohol consumption <math>&gt; 14</math> drinks per week<br/>ST segment depression of at least 2mm at an exercise level of 4 METS or less, hypotension, or complex arrhythmia during exercise<br/>Inability to complete the study protocol due to frailty, illness or other reason</p> | <p><b>Participants</b><br/>N=316 community-dwelling obese older adults</p> <p><b>Goal of weight loss</b><br/>5% of the total body weight over 18 months</p> <p><b>Period of intervention</b><br/>18 months</p> <p><b>Setting</b><br/>The Claude D. Pepper Older Americans Independence Center, Wake Forest University, USA</p> <p><b>Exercise</b><br/>1 hour 3 days/week consisted of an aerobic phase a resistance-training phase, a second aerobic phase, and a cool-down phase</p> <p><b>Dietary intervention</b><br/>Based on principles from the group dynamics literature and social cognitive theory; divided into 3 phases: <b>Intensive</b> (months 1–4), <b>Transition</b> (months 5–6), and <b>maintenance</b> (months 7–18)</p> <p><b>Dietary weight loss plus exercise</b><br/>Combined the exercise and dietary weight loss programs</p> | Usual care healthy life style (control)<br><br>Exercise group<br><br>Dietary weight loss group | <p><b>Primary outcome</b><br/>Self-reported physical function using the Western Ontario and McMaster Universities Osteoarthritis Index (WOMAC)</p> <p><b>Secondary outcomes</b><br/>Weight loss, 6-minute walk distance, stair-climb time, WOMAC pain and stiffness scores, and joint space width</p> | Data recorded at baseline, 6 and 18 months | <p>Significant body weight loss in diet groups (<math>P &lt; 0.05</math>). Diet plus exercise and diet group lost an average of 5.7% and 4.9% of their body weight respectively with 1.2% for the healthy lifestyle group</p> <p>Significant improvements in self-reported physical function (<math>P &lt; 0.05</math>), 6-minute walk distance (<math>P &lt; 0.05</math>), stair-climb time (<math>P &lt; 0.05</math>), and knee pain (<math>P &lt; 0.05</math>) in the diet plus exercise group compared with the healthy lifestyle group</p> <p>Significant improvement in the 6-minute walk distance in the exercise group (<math>P &lt; 0.05</math>). The diet-only group was not significantly different from the healthy lifestyle group with respect to any of the functional or mobility measures</p> <p>Changes in joint space width were not significantly different between groups</p> |

36  
37  
38  
39  
40  
41  
42  
43  
44  
45  
46  
47  
48  
49

1  
2  
3  
4  
5  
6  
7  
8  
9  
10  
11  
12  
13  
14  
15  
16  
17  
18  
19  
20  
21  
22  
23  
24  
25  
26  
27  
28  
29  
30  
31  
32  
33  
34  
35  
36  
37  
38  
39  
40  
41  
42  
43  
44  
45  
46  
47  
48  
49

| Title/Author/<br>year                                                                                                                                                                                           | Aim                                                                                                                                                                     | Eligibility criteria                                                                                                                                                                                                                                                                                                                                                                                                                                                                                                                                                                                                                                                                                                                                                                                                                                                                                              | Methods                                                                                                                                                                                                                                                                                                                                                                                                                                                                                                                                                                                                                                                                                                                                                                                                                                                                                                                                                                                                                                                                                                                                                                                                                                                                                         | Comparator                                                      | Outcome measures                                                                                                                                                                                                                                 | Assessment points                                       | Result                                                                                                                                                                                                                                                                                                                                                                                                                                                                                                                                                                                                                                                                                                                                                                                                      |
|-----------------------------------------------------------------------------------------------------------------------------------------------------------------------------------------------------------------|-------------------------------------------------------------------------------------------------------------------------------------------------------------------------|-------------------------------------------------------------------------------------------------------------------------------------------------------------------------------------------------------------------------------------------------------------------------------------------------------------------------------------------------------------------------------------------------------------------------------------------------------------------------------------------------------------------------------------------------------------------------------------------------------------------------------------------------------------------------------------------------------------------------------------------------------------------------------------------------------------------------------------------------------------------------------------------------------------------|-------------------------------------------------------------------------------------------------------------------------------------------------------------------------------------------------------------------------------------------------------------------------------------------------------------------------------------------------------------------------------------------------------------------------------------------------------------------------------------------------------------------------------------------------------------------------------------------------------------------------------------------------------------------------------------------------------------------------------------------------------------------------------------------------------------------------------------------------------------------------------------------------------------------------------------------------------------------------------------------------------------------------------------------------------------------------------------------------------------------------------------------------------------------------------------------------------------------------------------------------------------------------------------------------|-----------------------------------------------------------------|--------------------------------------------------------------------------------------------------------------------------------------------------------------------------------------------------------------------------------------------------|---------------------------------------------------------|-------------------------------------------------------------------------------------------------------------------------------------------------------------------------------------------------------------------------------------------------------------------------------------------------------------------------------------------------------------------------------------------------------------------------------------------------------------------------------------------------------------------------------------------------------------------------------------------------------------------------------------------------------------------------------------------------------------------------------------------------------------------------------------------------------------|
| Effects of Intensive Diet and Exercise on Knee Joint Loads, Inflammation and Clinical Outcomes Among Overweight and Obese Adults With Knee OA is the IDEA Randomized Clinical Trial<br>Messier et al., 2013 [3] | To determine whether a 10% reduction in body weight induced by diet, with or without exercise, would improve mechanistic and clinical outcomes more than exercise alone | <p><b>Inclusion</b><br/>Aged ≥55 years<br/>Kellgren-Lawrence grade 2 or 3 (mild or moderate) radiographic tibiofemoral OA or tibiofemoral plus patellofemoral OA of one or both knees, pain on most days due to knee OA.<br/>BMI from 27 to 41<br/>Sedentary lifestyle (&lt;30 minutes per week of formal exercise for the past 6months)<br/>Participants usual medications could be maintained or adjusted depending on physician advice</p> <p><b>Exclusion</b><br/>Significant co-morbid disease that would pose a safety threat or impair ability to participate, previous acute knee injury, patellofemoral OA in the absence of tibiofemoral OA<br/>Ability and willingness to modify dietary or exercise behaviours<br/>Excess alcohol use<br/>Inability to finish 18-month study or unlikely to be compliant<br/>Conditions that prohibit knee MRI<br/>Significant cognitive impairment or depression</p> | <p><b>Participants</b><br/>N=454</p> <p><b>Goal of weight loss</b><br/>10-15% of the total body weight</p> <p><b>Period of intervention</b><br/>18 months.</p> <p><b>Setting</b><br/>Wake Forest University and Wake Forest School of Medicine, USA</p> <p><b>Intensive Weight Loss Intervention</b><br/>The diet included up to 2meal-replacement shakes per day. For the third meal, participants followed a weekly menu plan and recipes that were 500 to 750 kcal, low in fat, and high in vegetables. Daily caloric intake was adjusted according to the rate of weight change between intervention visits. The initial diet plan provided an energy-intake deficit of 800 to 1000 kcal.day<sup>-1</sup> as predicted by energy expenditure (estimated resting metabolism ×1.2 activity factor)</p> <p><b>The Exercise Intervention</b><br/>It was conducted for 1 hour on 3 days/week for 18 months. Participation was centre-based for the first 6 months. After 6-month follow-up testing and a 2-week transition phase, participants could remain in the facility program, opt for a home-based program, or combine that two. The program consisted of aerobic walking (15 minutes), strength training (20minutes), a second aerobic phase (15minutes), and cool-down (10 minutes)</p> | Exercise group (control group)<br><br>Dietary weight loss group | <p><b>Primary outcomes</b><br/>Knee joint compressive force and plasma IL-6 concentration</p> <p><b>Secondary clinical outcomes</b><br/>Self-reported pain (range 0-20), function (range 0-68), mobility, and health-related quality of life</p> | Participants were assessed at baseline, 6 and 18 months | <p>Body weight was reduced significantly in both diet groups (diet and diet plus exercise) more than exercise group (P&lt;0.001)</p> <p>Within group differences:<br/>The diet plus exercise group lost about 10.6kg (11.4%), the diet group lost 8.9kg (9.5%) and 1.8kg (2.0%) of base line body weight</p> <p>No significant difference in walking speed and 6 minute walk test between groups</p> <p>Significant pain reduction was observed in the diet plus exercise group at 18months compared with exercise group (mean score, 1.02; 95% CI, 0.33-1.71; P = .004)</p> <p>The difference in the SF-36 physical subscale was 2.81 units in diet plus exercise relative to exercise group (95% CI, -4.76 to -0.86; P = .005)</p> <p>No significant difference in the mental subscale between groups</p> |

## Methods

In the pilot trial by Messier et al., (2000) participants were randomised into two groups, a combined intervention and control group [44]. The control group received an exercise programme similar to the intervention group [44]. Messier et al., (2004) [45] randomised participants into four groups; combined intervention, exercise, diet and a control group. The control group received health education plus telephone contact to obtain information on pain, medication use, illness, and hospitalisation [45]. Messier et al., (2013) [3] randomised participants into three groups; combined intervention, diet group and exercise group. The exercise alone group was the control. Duration of the trial was six for the pilot trial [44] and eighteen months for ADAPT [45] and IDEA [3].

## Participants

All participants were community dwelling, obese older adults with radiographic evidence of knee OA. A total of 794 participants aged 55 years or older were randomised into the included studies. One hundred and fifty five participants were included in the meta-analysis.

## Interventions

The pilot trial [44] and two definitive trials [3, 45] were conducted by the same group from Wake Forest University, Winston-Salem, NC, USA. The goal of weight loss varied from 6.8kg over 6 months to 10-15% of total body weight over eighteen months of intervention. Outcomes were recorded at 3 time-points for the pilot trial (baseline, 3 months and 6 months) and for the two definitive trials (baseline, 6 months and eighteen months). Exercise duration and frequency were similar in all included trials (1 hour/ 3 times per week). Exercise types were aerobic exercise and resistance training. Principles from group dynamics and social-cognitive theory were used for behavioural treatment in the diet group in IDEA [3]. The diet sessions were graded from intensive (facilitating behavioural changes by using self-regulatory skills) to transition stage (assisting participants who not reached their weight loss goals in establishing new goals) and maintenance stage (assisting patients who had reached their weight loss goals to maintenance their weight loss). For the intensive weight loss trial the daily caloric intake was adjusted according to the rate of weight change between intervention visits (low fat and high vegetable diet). The initial diet plan provided an energy-intake deficit of 800 to 1000 Kcal.day<sup>-1</sup>, as predicted by an energy expenditure (estimated resting metabolism × 1.2 activity factor), of at least 1200kcal for men and 1100 for women [3].

## Outcome measures

Due to few eligible studies, analysis was based upon all of the outcomes of interest (body weight and BMI as well as musculoskeletal function), irrespective of whether they were specified as the primary a secondary outcome in the included trials (see below):

Messier et al., (2000): No primary or secondary outcomes were specified [44].

Messier et al., (2004): The ADAPT primary outcome was self-reported physical function measured using the Western Ontario and McMaster Universities Osteoarthritis Index (WOMAC) Secondary outcomes included weight loss, 6-minute walk distance, stair-climb time, WOMAC pain and stiffness scores, and joint space width [45].

Messier et al., (2013): In the IDEA trial the primary outcomes were knee joint compressive force and plasma IL-6 concentration. Secondary outcome measures included WOMAC pain,

WOMAC function, gait speed, 6 minute walk test, quality of life, body weight, height, BMI and body composition [3].

### Risk of bias within trials

Substantial inter-reviewer agreement was achieved on the risk of bias assessment ( $k= 0.73$ ) [32]. All of the included trials were evaluated as unclear risk of bias [34]. Most of the key domains were assessed as unclear risk of bias within each trial (Table 3).

**Table 3: Summary assessment of the overall risk of bias for each trial.**

| Study<br>(Author,<br>year) | Component of risk of bias |   |   |   |   |   | Summary<br>risk of<br>bias |
|----------------------------|---------------------------|---|---|---|---|---|----------------------------|
|                            | 1                         | 2 | 3 | 4 | 5 | 6 |                            |
| Messier et al.,<br>2000    | U                         | U | U | U | L | U | Unclear (5)<br>Low (1)     |
| Rejeski et al.,<br>2002    | U                         | U | U | L | L | U | Unclear (4)<br>Low (2)     |
| Messier et al.,<br>2004    | L                         | U | U | L | L | U | Unclear (3)<br>Low (3)     |
| Focht et al., 2005         | U                         | U | U | L | L | U | Unclear (4)<br>Low (2)     |
| Messier et al.,<br>2013    | L                         | U | U | L | L | U | Unclear (3)<br>Low (3)     |

### Risk of bias across trials

Risk of bias across trials was evaluated as unclear [34] only component 5 (selective outcome reporting) was evaluated as low risk of bias for all studies. For the 'blinding of participants, personnel and outcome assessor' component, all trials were evaluated as having unclear risk of bias as no strategies were reported to address the issue of outcome assessor unblinding. Also, for the 'other sources of bias' components, all trials were evaluated with unclear risk of bias due to unclear reporting.

### Results of individual trials and synthesis of results

#### Quantitative synthesis

Meta-analysis was possible for only one outcome measure at one assessment time-point. Meta-analysis was used to assess the effect of the combined intervention programme compared with exercise on the 6 minute walk test (metres) after 6 months of intervention. Only two trials [3, 44] with unclear risk of bias with  $n=155$  participants were available for meta-analysis. The pooled random effects (15.05, 95% CI -11.77 to 41.87) did not support a combined intervention effect (Figure 2).

#### Synthesis of results

##### Modified narrative synthesis

With respect to the guidelines for a narrative synthesis, only two elements were possible to apply; developing a preliminary synthesis and exploring the relationships within and between studies [39, 40].

##### *Developing a preliminary synthesis*

Tabulation was used to present primary and secondary outcome measures that were not included in the meta-analysis; body weight, knee ROM, physical function, mobility, pain and

QoL. Studies including a comparison of the combined intervention programme with an exercise intervention are presented in Tables 4-5.

**Table 4: Preliminary synthesis for the primary outcome measures at baseline and after intervention; body weight, knee ROM, physical function and mobility comparing the combined intervention programme with an exercise intervention**

| Category          | Outcome measure                         | Assessment point | Study                | Intervention group |     |              |     | Control group |     |              |     |
|-------------------|-----------------------------------------|------------------|----------------------|--------------------|-----|--------------|-----|---------------|-----|--------------|-----|
|                   |                                         |                  |                      | M0 (SD0)           | N0  | M1 (SD1)     | N1  | M0 (SD0)      | N0  | M1 (SD1)     | N1  |
| Body weight       | Body weight (kg)                        | 6 months         | Messier et al., 2000 | 91 (13)            | 13  | 82.5 (4)     | 12  | 109 (17)      | 11  | 107.2 (15)   | 9   |
|                   |                                         | 6 months         | Messier et al., 2013 | 93 (14.7)          | 152 | 84.3 (14.7)  | 133 | 92.3 (14.6)   | 150 | 92.4 (15.4)  | 122 |
|                   |                                         | 18 months        | Messier et al., 2013 | 93 (14.7)          | 152 | 82.4 (15.2)  | 121 | 92.3 (14.6)   | 150 | 90.5 (15)    | 115 |
| Knee ROM          | ROM                                     | 6 months         | Messier et al., 2000 | 55.27* (N/A)       | 13  | 56.47 (0.91) | 12  | 55.27* (N/A)  | 11  | 56.73 (1.02) | 9   |
|                   | Estimated Concentric extension (Degree) | 6 months         | Messier et al., 2000 | 30.7 (N/A)         | 13  | 31 (N/A)     | 12  | 30.7 (N/A)    | 11  | 33.4 (N/A)   | 9   |
|                   | Estimated Concentric flexion            | 6 months         | Messier et al., 2000 | 18.2 (N/A)         | 13  | 18.5 (N/A)   | 12  | 18.2 (N/A)    | 11  | 20.8 (N/A)   | 9   |
| Physical function | Physical function (WOMAC)               | 18 months        | Messier et al., 2013 | 24.6 (11.7)        | 152 | 14.2 (10.4)  | 121 | 23.1 (10.3)   | 150 | 17.6 (9.8)   | 115 |
| Mobility          | 6 min walk test (meters)                | 18 months        | Messier et al., 2013 | 467 (87.9)         | 152 | 537 (92.6)   | 121 | 480 (90.3)    | 150 | 525 (79.2)   | 115 |
|                   | Stair climb (seconds)                   | 6 months         | Messier et al., 2000 | 9.81*              | 13  | 7.4 (0.32)   | 12  | 9.81*         | 11  | 8.7 (0.36)   | 9   |

Abbreviations: M0 (SD0)= Mean and standard deviation at baseline, N0= Participants number at baseline, M1 (SD1)= Mean and standard deviation after intervention, N1= Participants number after intervention, N/A= Data not available.

**Table 5: Preliminary synthesis for the secondary outcome measures at baseline and after intervention; body weight, pain and QoL comparing the combined intervention programme with an exercise intervention**

| Category | Outcome measure          | Assessment point | Study                | Intervention group |     |            |     | Control group |     |            |     |
|----------|--------------------------|------------------|----------------------|--------------------|-----|------------|-----|---------------|-----|------------|-----|
|          |                          |                  |                      | M0 (SD0)           | N0  | M1 (SD1)   | N1  | M0 (SD0)      | N0  | M1 (SD1)   | N1  |
| Pain     | WOMAC pain               | 6 months         | Messier et al., 2013 | 6.7 (3.4)          | 152 | 4.6 (2.9)  | 133 | 6.1 (2.9)     | 150 | 4.5 (3)    | 122 |
|          | WOMAC pain               | 18 months        | Messier et al., 2013 | 6.7 (3.4)          | 152 | 3.7 (3.1)  | 121 | 6.1 (2.9)     | 150 | 4.4 (2.7)  | 115 |
| QoL      | SF-36 Physical component | 6 months         | Messier et al., 2013 | 36.6 (9.41)        | 152 | 43.5 (9)   | 133 | 36.8 (9)      | 150 | 41.5 (9)   | 122 |
|          | SF-36 Mental component   | 6 months         | Messier et al., 2013 | 57.2 (6.6)         | 152 | 56.9 (7.3) | 133 | 56.5 (8.4)    | 150 | 56.1 (7.6) | 122 |
|          | SF-36 Physical component | 18 months        | Messier et al., 2013 | 36.6 (9.41)        | 152 | 44.7 (8.7) | 121 | 36.8 (9)      | 150 | 42.0 (9)   | 115 |
|          | SF-36 Mental component   | 18 months        | Messier et al., 2013 | 57.2 (6.6)         | 152 | 56.1 (6.5) | 121 | 56.5 (8.4)    | 150 | 55.4 (7.6) | 115 |

Abbreviations: M0 (SD0)= Mean and standard deviation at baseline, N0= Participants number at baseline, M1 (SD1)= Mean and standard deviation after intervention, N1= Participants number after intervention, N/A= Data not available.



Tabulation was used to compare the effect of the combined intervention programme compared with usual care (healthy life style) on primary and secondary outcome measures; body weight, physical function, mobility, pain and QoL (Tables 6-7).

**Table 6: Preliminary synthesis for the primary outcome measures at baseline and after intervention; physical function and mobility comparing the combined intervention programme with usual care**

| Category          | Outcome measure           | Assessment point | Study                | Intervention group |     |              |     | Control group |     |               |     |
|-------------------|---------------------------|------------------|----------------------|--------------------|-----|--------------|-----|---------------|-----|---------------|-----|
|                   |                           |                  |                      | M0 (SD0)           | N0  | M1 (SD1)     | N1  | M0 (SD0)      | N0  | M1 (SD1)      | N1  |
| Body weight       | Body weight (kg)          | 18 months        | Messier et al., 2004 | 92 (1.7)           | 76  | 86.8 (N/A)   | 58  | 96 (1.8)      | 78  | 94.9 (N/A)    | 67  |
| Physical function | Physical function (WOMAC) | 6 months         | Messier et al., 2004 | 23.6 (12.2)        | 76  | 17.9* (N/A)  | 63  | 26 (11.4)     | 78  | 22.4* (N/A)   | 70  |
|                   | Physical function (WOMAC) | 18 months        | Messier et al., 2004 | 23.6 (12.2)        | 76  | 29.3* (N/A)  | 58  | 26 (11.4)     | 78  | 29.4 (N/A)    | 67  |
| Mobility          | 6 min walk test (meters)  | 6 months         | Messier et al., 2004 | 416.2 (98.7)       | 76  | 482.3 (100)  | 63  | 434.6 (96.4)  | 78  | 429 (108)     | 70  |
|                   | 6 min walk test (meters)  | 18 months        | Messier et al., 2004 | 416.2 (98.7)       | 76  | 477.8 (99.7) | 58  | 434.6 (96.4)  | 78  | 429.9 (104.7) | 67  |
|                   | 6 min walk test (meters)  | 18 months        | Focht et al., 2005   | 414.5 (85.3)       | N/A | 465 (96.3)   | N/A | 433.4 (81.9)  | N/A | 430 (79.5)    | N/A |
|                   | Stair climb (seconds)     | 6 months         | Messier et al., 2004 | 10.9 (5.8)         | 76  | 8.8 (6.2)    | 63  | 9.5 (5.6)     | 78  | 9.9 (6.3)     | 70  |
|                   | Stair climb (seconds)     | 18 months        | Focht et al., 2005   | 10.4 (7.3)         | N/A | 8.9 (5.4)    | NA  | 9.4 (4.9)     | N/A | 9.9 (5.6)     | N/A |

\*Estimated value from Figure 2 in Messier et al., 2004.

Abbreviations: M0 (SD0)= Mean and standard deviation at baseline, N0= Participants number at baseline, M1 (SD1)= Mean and standard deviation after intervention, N1= Participants number after intervention, N/A= Data not available.

**Table 7: Preliminary synthesis for the secondary outcome measures at baseline and after intervention; body weight, pain and QoL comparing the combined intervention programme with usual care**

| Category | Outcome measure          | Assessment point           | Study                | Intervention group |    |              |     | Control group |    |              |     |
|----------|--------------------------|----------------------------|----------------------|--------------------|----|--------------|-----|---------------|----|--------------|-----|
|          |                          |                            |                      | M0 (SD0)           | N0 | M1 (SD1)     | N1  | M0 (SD0)      | N0 | M1 (SD1)     | N1  |
| Pain     | Pain scale (WOMAC)       | 6 months                   | Messier et al., 2004 | 7.3 (3.6)          | 76 | 5.5 (3.7)    | 63  | 7.3 (3.4)     | 78 | 6.2 (3.9)    | 70  |
|          | Pain scale (WOMAC)       | 18 months                  | Messier et al., 2004 | 7.3 (3.6)          | 76 | 5.1 (3.6)    | 58  | 7.3 (3.4)     | 78 | 6 (3.7)      | 67  |
| QoL      | SF-36 Physical component | Average of 6 and 18 months | Rejeski et al. 2002  | 35.39 (10.5)       | 68 | 40.57 (N/A)* | N/A | 33.60 (8.4)   | 68 | 34.41 (N/A)* | N/A |
|          | SF-36 Mental component   | Average of 6 and 18 months | Rejeski et al. 2002  | 52.85 (10.7)       | 68 | 53.31 (N/A)* | N/A | 52.70 (10.9)  | 68 | 53.51 (N/A)* | N/A |

Abbreviations: M0 (SD0)= Mean and standard deviation at baseline, N0= Participants number at baseline, M1 (SD1)= Mean and standard deviation after intervention, N1= Participants number after intervention, N/A= Data not available, \*= only SEM data available; SD1 data could not be calculated due to missing N1 value.

### *Exploring the relationships within and between studies*

Characteristics of the trials are presented in Table 2. All included trials were conducted by the same research group. The eligibility criteria were very similar across studies. The exercise intervention included strengthening and aerobic exercise. The intervention frequency (1 hour/3 times per week) was the same across the included trials. Further details about the design of the trials are presented above.

Tables 4 & 6 show differences between the intervention group and the control group (despite the comparator) with respect to body weight and the 6 minute walk distance. These differences were consistent with the results from the included trials. The diet plus exercise group in the pilot study [44] lost weight compared with the control group ( $p=0.01$ ) after 6 months of intervention [44] and this was also the case with respect to the longer duration intervention trial (18 months) in which the intervention group lost significantly ( $p<0.001$ ) more weight than the exercise group [3]. However, in ADAPT [45] both groups (intervention and healthy lifestyle) lost weight ( $p<0.05$ ) after 18 months of intervention [45] although there was a significant difference in the 6 minute walk result in favour of the diet plus exercise group ( $p<0.05$ ) [45]. Also, there was a significant difference ( $p=0.005$ ) in the 6 minute walk between the intervention and exercise groups in the IDEA trial [3].

### Additional analysis

No further analyses were possible owing to the lack of reported information and low number of included trials.

### Grading the quality of evidence

A summary assessment was undertaken to draw conclusions about the overall quality of evidence for the combined intervention on mobility using GRADE software [43]. Both trials included in the meta-analysis [3, 44] were evaluated as 'high' quality evidence before being downgraded as they were RCTs, before being modified according to five negative and two positive factors [41, 42]. The quality of evidence for a combined intervention programme of physical activity and diet on walking distance (metres) within 6 minutes after a period of 6 months of intervention was evaluated as moderate (Table 8).

**Table 8: Factors determining the quality of evidence according to GRADE**

| Factor              | Judgment    | Explanation                                                                                                                                                                                                                                                                                                                                                                                                                                                                                                                                                                                                         |
|---------------------|-------------|---------------------------------------------------------------------------------------------------------------------------------------------------------------------------------------------------------------------------------------------------------------------------------------------------------------------------------------------------------------------------------------------------------------------------------------------------------------------------------------------------------------------------------------------------------------------------------------------------------------------|
| 1. Risk of bias     | Not serious | <ul style="list-style-type: none"> <li>➤ Only two studies included in meta-analysis and both of them evaluated as unclear risk of bias.</li> <li>➤ No serious limitations to downgrade the quality of evidence.</li> <li>➤ Sequence generation was not reported in 1 study; allocation concealment not specified in both studies; no strategy reported to address issue of outcome assessor unblinding.</li> <li>➤ Incomplete outcome data evaluated as 'unclear' in the pilot study; no mention of missing data or methods used to address missing data; no primary outcome stated for the pilot study.</li> </ul> |
| 2. Inconsistency    | Not serious | <ul style="list-style-type: none"> <li>➤ <math>I^2=50\%</math>, which may be evaluated as either low or substantial heterogeneity; this overlap affects the decision making.</li> <li>➤ Magnitude of heterogeneity could be the result of high variability in the sample size and effect size which justifies the decision.</li> </ul>                                                                                                                                                                                                                                                                              |
| 3. Indirectness     | Not serious | <ul style="list-style-type: none"> <li>➤ Direct applicability of the included studies aims and objectives to their target populations, interventions and outcomes of interest.</li> </ul>                                                                                                                                                                                                                                                                                                                                                                                                                           |
| 4. Imprecision      | Serious     | <ul style="list-style-type: none"> <li>➤ Boundaries of CI crossing the no effect line which downgrades the quality of evidence by one level.</li> <li>➤ Number of participants needed for a single powered trial is higher than number of participants estimated from the meta-analysis; quality of evidence not downgraded on this basis.</li> </ul>                                                                                                                                                                                                                                                               |
| 5. Publication bias | Undetected  | <ul style="list-style-type: none"> <li>➤ Selective outcome reporting domain evaluated low in both studies; publication bias considered as not serious by two reviewers.</li> </ul>                                                                                                                                                                                                                                                                                                                                                                                                                                  |

## DISCUSSION

### Summary of evidence

This is the first systematic review and mixed methods analysis investigating the effectiveness of combining dietary restriction and physical activity interventions for musculoskeletal function in older overweight/ obese elders with knee OA. One pilot trial [44] and two definitive trials [3, 45] (794 participants) conducted by the same research group (Wake Forest University, Winston-Salem, NC, USA) were included. The intervention programme was compared with exercise training in one definitive trial (IDEA) [3] and the pilot trial [44], while usual care was the comparator in the ADAPT [45]. Two additional articles [46, 47] which reported further outcomes of the ADAPT were identified [45].

Data syntheses of this review were conducted using both meta-analysis and modified narrative synthesis. Although visual inspection of the tables of results indicated that the combined programme enhanced body weight reduction, and improved mobility, there was moderate evidence for no effect. Changes of BMI scores were not reported in the included studies. Meta-analysis was possible for only the 6 minute walk test at 6 months and was not possible for the other outcome measures due to the inconsistency of assessment points or the comparator. The pooled random effect of two trials [3, 44] with 155 participants did not support the combined intervention program (15.05, 95% CI -11.77 to 41.87) (albeit with a total effect of 15 m deemed not clinically significant according to previous literature) [49, 50]. Although the meta-analyses showed substantial heterogeneity  $I^2=50\%$ , this was classified as not serious using the GRADE evaluation tool [41, 42] as it was assessed as likely to be due to high variability in both the sample size and effect size. Clinical heterogeneity across trials was limited to comparator and duration. Overall the quality of evidence was downgraded to moderate due to imprecision of the results according to GRADE [43]. All included trials were reported as having an unclear risk of bias which was mainly due to unclear reporting of some information [34]. For instance, both the 'blinding of participants, personnel and outcome assessor' and the 'other sources of bias' component were evaluated as unclear for all trials.

Results from the trial by Messier et al., [44] indicated no statistically significant differences across groups with regard to self-reported performance measures of physical function, knee pain scores, knee strength and biomechanical measures (synovial fluid, keratan sulfate and level of IL-1) after 6 months of intervention. Findings from Messier et al., [45] indicated a statistically significant benefit of the combined intervention in terms of self-reported physical function, 6 minute walk test, stair climb and knee pain. The findings from Messier et al., [3] indicated a significant improvement in the 6 minute walk test and walking speed in the intervention group. Moreover, there was a significant reduction ( $p<0.05$ ) of body weight among the intervention groups in all trials. In the current review the finding of no effect of a combined intervention programme may be due to the very low number of included trials (and participants) but probably is not due to low compliance. Compliance within each trial was good. For example, in the pilot study [44] compliance (ratio of the number of exercise sessions attended to the total number of the exercise sessions prescribed with the exercise programme) was 82.6% for the exercise group and 94.7% for diet plus exercise group. For the IDEA trial [3], 399/ 454 participants (88%) completed the study; compliance of the diet and exercise group was 70% at 6 months and 58% at 18 months with no adverse events and no significant difference between groups.

In addition to diet and exercise two current trials MEDIC1 [28] and MEDIC2 [27] have reported that a multimodal approach of education, neuromuscular exercise, insoles and, if indicated, a dietary weight loss program and pain medication are effective for adults and

1  
2  
3 older adults with moderate to severe knee OA. These studies were not included in this review  
4 due to the wide age range across participants. MEDIC 1 [28] included 9 participants and  
5 MEDIC2 [27] included 12 participants below the age of 55 years and there was no sub-group  
6 analysis of older participants. In MEDIC1 [28] the participants were eligible for total knee  
7 replacement (TKR) and were randomized to nonsurgical and surgical treatment followed by  
8 the intervention programme. Both interventions showed substantial improvement but the  
9 surgical treatment resulted in greater pain relief and functional improvement after 12 months  
10 compared with nonsurgical treatment alone. However, only 26% of the patients who were  
11 assigned to receive nonsurgical treatment alone underwent TKR in the following year [28]. In  
12 MEDIC2 [27] participants had radiographic confirmation of OA (Kellgren-Lawrence grade  
13  $\geq 1$ ), but were not eligible for a TKR. The 12-week non-surgical treatment program consisted  
14 of individualized progressed neuromuscular exercise, patient education, insoles, dietary  
15 advice and prescription of pain medication if indicated, while usual care comprised two  
16 leaflets with information and advice on knee OA and recommended treatments. This  
17 nonsurgical treatment program was found to be more effective with respect to pain, activities  
18 of daily living and QoL at 12 months compared with usual care, although it was not possible  
19 to determine which of the components within this multi-intervention programme were most  
20 effective and whether the intervention as a whole would be equally effective in older OA  
21 patients [27].  
22  
23

24  
25 The main limitation of this review is that only few eligible studies were identified. Thus, the  
26 optimal components of dietary and exercise interventions in terms of type, duration and  
27 quantity suitable for this population are still unclear. Future studies are required in this field  
28 to optimise outcome measures and methods of delivering a programme at an acceptable cost,  
29 prior to a future adequately powered definitive trial.  
30

### 31 **Conclusion**

32 Based on current evidence synthesised in this review, it is hard to judge the effectiveness of a  
33 combined programme of diet and physical activity due to the low number of included trials  
34 and participants and the quality of available evidence. Only moderate quality evidence was  
35 available to investigate the intervention programmes. However, the narrative synthesis  
36 suggests that interventions with a focus on reduction of body weight and/or improved  
37 mobility are worthy of further evaluation. Further adequately powered RCT testing the  
38 effects of a combined intervention against each component individually are required to  
39 optimise diet and exercise interventions using a multimodal approach.  
40  
41

### 42 **Acknowledgement**

43 The authors would like to thank Lynn Harris, Library Services, University of Birmingham for  
44 her contribution to the development of the search strategies.  
45  
46

### 47 **Contributorship statement**

48 ASA led the review and contributed to all stages, including development of the search  
49 strategy, running the searches, assessing trials eligibility, data extraction and synthesis  
50 (including risk of bias and GRADE analysis), and preparation of the manuscript. CAG and  
51 ABR provided expertise in systematic review methodology and risk of bias analysis. AMK  
52 assisted with assessment of eligibility of included studies and data extraction. All authors  
53 read and provided feedback on the preparation of this manuscript according to a PRISMA  
54 2009 checklist and approved the final manuscript.  
55  
56  
57  
58  
59  
60

### Competing interests

There are no competing interests.

### Funding

This review is a part of a PhD program undertaken by ASA, and is fully funded by the King Saud University, Kingdom of Saudi Arabia, Riyadh and the Saudi Arabian Cultural Bureau, United Kingdom, London.

### Data sharing statement

There are no additional unpublished data from the review.

Figure 1: Study selection flow diagram [48].

Figure 2: 6 minute walk test (metres) at 6 months.

### REFERENCES

1. Imamura M, Imamura ST, Kaziyama HH, et al. Impact of nervous system hyperalgesia on pain, disability, and quality of life in patients with knee osteoarthritis: a controlled analysis. *Arthritis Care Res* 2008;59(10):1424-1431.
2. Arthritis Foundation (2015) what is arthritis [online]. Available from: <http://www.arthritis.org/about-arthritis/understanding-arthritis/> [Accessed July 2016]
3. Messier SP, Mihalko SL, Legault C, et al. Effects of intensive diet and exercise on knee joint loads, inflammation, and clinical outcomes among overweight and obese adults with knee osteoarthritis: the IDEA randomized clinical trial. *JAMA* 2013;310(12):1263-1273.
4. Pouli N, Nair RD, Lincoln NB, et al. The experience of living with knee osteoarthritis: exploring illness and treatment beliefs through thematic analysis. *Disabil Rehabil* 2013;36 (7):600-607.
5. Heidari B. Knee osteoarthritis prevalence, risk factors, pathogenesis and features: Part I. *Caspian J Intern Med* 2011;2(2):205.
6. Vos T, Flaxman AD, Naghavi M, et al. Years lived with disability (YLDs) for 1160 sequelae of 289 diseases and injuries 1990–2010: a systematic analysis for the Global Burden of Disease Study 2010. *The Lancet* 2013 Jan 4;380(9859):2163-96.
7. Hammerich AS, Anemaet WK. Applying the Evidence for Exercise Prescription in Older Adults with Knee Osteoarthritis. *Curr Geriatr Rep* 2016 Sep 1;5(3):179-90.
8. Arthritis Research UK (2013) Osteoarthritis in General Practice, Data and Perspectives [online]. Available from: <http://www.arthritisresearchuk.org/policy-and-public-affairs/reports-and-resources/reports.aspx> [Accessed July 2016]
9. Felson DT, Lawrence RC, Hochberg MC, et al. Osteoarthritis: new insights. Part 2: treatment approaches. *Ann Intern Med* 2000;133:726–37.
10. Bhatia D, Bejarano T, & Novo M. Current interventions in the management of knee osteoarthritis. *J. Pharm. Bioall. Sci.* 2013;5(1):30.
11. Abbott JH, Robertson MC, Chapple C, et al. Manual therapy, exercise therapy, or both, in addition to usual care, for osteoarthritis of the hip or knee: a randomized controlled trial. 1: clinical effectiveness. *Osteoarthritis Cartilage* 2013;21(4):525-534.
12. DeJaco C, Singh YP, Perel P, et al. 2015 Recommendations for the management of polymyalgia rheumatica: a European League Against Rheumatism/American College of Rheumatology collaborative initiative. *Arthritis Rheumatol* 2015;67(10): 2569-2580.

13. Fernandes L, Hagen KB, Bijlsma JW, et al. EULAR recommendations for the non-pharmacological core management of hip and knee osteoarthritis. *Ann. Rheum. Dis* 2013;72(7):1125-1135.
14. McAlindon TE, Bannuru R, Sullivan MC, et al. OARSI guidelines for the non-surgical management of knee osteoarthritis. *Osteoarthritis Cartilage* 2014;22(3):363-388.
15. Ryan P. & Sawin K.J. The Individual and Family Self-Management Theory: background and perspectives on context, process and outcomes. *Nurs Outlook* 2009; 57, 217–225. doi:10.1016/j.outlook.2008.10.004.
16. Kao MH, Tsai YF, Chang TK, et al. The effects of self management intervention among middle age adults with knee osteoarthritis. *J Adv Nurs* 2016;72(8), 1825-1837.
17. Yusuf E. Pharmacologic and Non-Pharmacologic Treatment of Osteoarthritis. *Curr Treatm Opt Rheumatol* 2016; 1;2(2):111-25.
18. Coggon DI, Reading I, Croft P, et al. Knee osteoarthritis and obesity. *International journal of obesity and related metabolic disorders: journal of the International Association for the Study of Obesity* 2001;25(5):622-627.
19. Huang MH, Chen CH, Chen TW, et al. The effects of weight reduction on the rehabilitation of patients with knee osteoarthritis and obesity. *Arthritis Care Res* 2000;13(6):398-405.
20. Christensen R, Bartels EM, Astrup A, et al. Effect of weight reduction in obese patients diagnosed with knee osteoarthritis: a systematic review and meta-analysis. *Ann Rheum Dis* 2007;66(4):433-439.
21. Messier SP. Diet and exercise for obese adults with knee osteoarthritis. *Clin. Geriatr. Med.* 2010;26(3):461-477.
22. Roddy E, Zhang W, & Doherty M. Aerobic walking or strengthening exercise for osteoarthritis of the knee? A systematic review. *Ann Rheum Dis* 2005;64(4):544-548.
23. Patrick DL, Ramsey SD, Spencer AC, et al. Economic evaluation of aquatic exercise for persons with osteoarthritis. *Med care* 2001;39(5):413-424.
24. Minor MA, Webel RR, Kay DR, et al. Efficacy of physical conditioning exercise in patients with rheumatoid arthritis and osteoarthritis. *Arthritis Rheum* 1989; 32(11):1396-1405.
25. Marks R. Knee Osteoarthritis, Obesity and Exercise Therapy-A Complex Issue. *J Obes Eat Disord.* 2016;2(2).
26. Ekram AS, Cicuttini FM, Teichtahl AJ, et al. Weight satisfaction, management strategies and health beliefs in knee osteoarthritis patients attending an outpatient clinic. *Intern. Med.* 2016 Apr 1;46(4):435-42.
27. Skou ST, Rasmussen S, Laursen MB, et al. The efficacy of 12 weeks non-surgical treatment for patients not eligible for total knee replacement: a randomized controlled trial with 1-year follow-up. *Osteoarthritis Cartilage* 2015;23(9):1465-1475.
28. Skou ST, Roos EM, Laursen MB, et al. A randomized, controlled trial of total knee replacement. *N. Engl. J. Med.* 2015;373(17):1597-1606.
29. Moher D, Liberati A, Tetzlaff J, et al. Preferred reporting items for systematic reviews and meta-analyses: the PRISMA statement. *Ann. Intern. Med.* 2009;151(4):264-269.

- 1  
2  
3 30. Higgins JPT, Green S, eds. Cochrane Handbook for Systematic Reviews of  
4 Interventions Version 5.1.0. The Cochrane Collaboration 2011. Available  
5 from: <http://www.cochrane-handbook.org/> [Accessed July 2016].  
6  
7 31. Brandt KD, Fife RS, Braunstein EM, et al. Radiographic grading of the severity of  
8 knee osteoarthritis: relation of the Kellgren and Lawrence grade to a grade based on  
9 joint space narrowing, and correlation with arthroscopic evidence of articular cartilage  
10 degeneration. *Arthritis Rheum* 1991;34(11):1381-1386.  
11  
12 32. Hsu LM, & Field R. Interrater agreement measures: Comments on Kappan, Cohen's  
13 Kappa, Scott's  $\pi$ , and Aickin's  $\alpha$ . *Understand Stat* 2003;2(3):205-219.  
14  
15 33. Consumers and Communication Group resources for authors; Data Extraction  
16 Template (word format). Available from: [http://cccr.org.cochrane.org/author-resources](http://cccr.org/cochrane.org/author-resources).  
17 [Accessed July 2016].  
18  
19 34. Higgins JP, Altman DG, Gøtzsche PC, et al. The Cochrane Collaboration's tool for  
20 assessing risk of bias in randomised trials. *BMJ* 2011;343:d5928.  
21  
22 35. Green S, Higgins JP, eds. Chapter 2: Preparing a cochrane review. In: Higgins JP,  
23 Green S, eds. Cochrane Handbook for Systematic Reviews of Interventions Version  
24 5.1.0. Available from:  
25 [http://handbook.cochrane.org/chapter\\_2/2\\_preparing\\_a\\_cochrane\\_review.htm](http://handbook.cochrane.org/chapter_2/2_preparing_a_cochrane_review.htm)  
26 [Accessed July 2016].  
27  
28 36. DerSimonian R, Laird N. Meta-analyses in clinical trials. *Control Clin Trials* 1986;  
29 7:177e88.  
30  
31 37. Centre for Reviews and Dissemination [CRD]. Systematic Reviews: CRD's Guidance  
32 for Undertaking Reviews in Healthcare. 3rd edn. CRD University of York, York  
33 Publishing Services Ltd, York, 2009. Available from:  
34 [https://www.york.ac.uk/media/crd/Systematic\\_Reviews.pdf](https://www.york.ac.uk/media/crd/Systematic_Reviews.pdf). [Accessed July 2016].  
35  
36 38. Deeks JJ, Higgins JP, Altman DG, eds. Chapter 9: Analyzing data and undertaking  
37 meta-analyses. In: Higgins JP, Green S, eds. Cochrane Handbook for Systematic  
38 Reviews of Interventions Version 5.1.0. Available from:  
39 [http://handbook.cochrane.org/chapter\\_9/9\\_8\\_chapter\\_information.htm](http://handbook.cochrane.org/chapter_9/9_8_chapter_information.htm).  
40 [Accessed July 2016].  
41  
42 39. Rodgers M, Arai L, Britten N, et al. Guidance on the conduct of narrative synthesis in  
43 systematic reviews: a comparison of guidance-led narrative synthesis versus meta-  
44 analysis. *In 14th Cochrane Colloquium* 2006: 23-26.  
45  
46 40. Popay J, Roberts H, Sowden A, et al. Guidance on the conduct of narrative synthesis in  
47 systematic reviews. *ESRC methods programme* 2006;15(1):047-71.  
48  
49 41. Guyatt GH, Oxman AD, Kunz R, et al. GRADE guidelines 6. Rating the quality of  
50 evidence—imprecision. *J. clin. Epidemiol.* 2011;64(12):1283-1293.  
51  
52 42. Schünemann H, Brozek J, & Oxman A. GRADE handbook for grading quality of  
53 evidence and strength of recommendation. The GRADE Working Group 2009.  
54 Available from: <http://gdt.guidelinedevelopment.org/app/handbook/handbook.html>.  
55 [Accessed July 2016].  
56  
57 43. Grading quality of evidence and strength of recommendations. [www.grade.pro.org](http://www.grade.pro.org)  
58 [Accessed July 2016].  
59  
60

- 1  
2  
3 44. Messier SP, Loeser RF, Mitchell MN, et al. Exercise and weight loss in obese older  
4 adults with knee osteoarthritis: a preliminary study. *J Am Geriatr Soc*  
5 2000;48(9):1062-1072.  
6  
7 45. Messier S, Loeser RF, Miller GD, et al. Exercise and dietary weight loss in overweight  
8 and obese older adults with knee osteoarthritis: the Arthritis, Diet, and Activity  
9 Promotion Trial. *Arthritis Rheum* 2004;50(5):1501-1510.  
10  
11 46. Rejeski WJ, Focht BC, Messier SP, et al. Obese, older adults with knee osteoarthritis:  
12 weight loss, exercise, and quality of life. *Health Psychol* 2002;21(5):419.  
13  
14 47. Focht BC, Rejeski WJ, Ambrosius WT, et al. Exercise, self-efficacy, and mobility  
15 performance in overweight and obese older adults with knee osteoarthritis. *Arthrit*  
16 *Care Res* 2005;53(5):659-665.  
17  
18 48. Stovold E, Beecher D, Foxlee R, et al. Study flow diagrams in Cochrane systematic  
19 review updates: an adapted PRISMA flow diagram. *Syst. Rev.* 2014; 3(1), 54.  
20  
21 49. Gremeaux V, Troisgros O, Benaïm S, et al. Determining the minimal clinically  
22 important difference for the six-minute walk test and the 200-meter fast-walk test  
23 during cardiac rehabilitation program in coronary artery disease patients after acute  
24 coronary syndrome. *Arch. Phys. Med. Rehabil.* 2011; 92(4), 611-619.  
25  
26 50. Perera S, Mody SH, Woodman RC, et al. Meaningful change and responsiveness in  
27 common physical performance measures in older adults. *J Am Geriatr Soc* 2006;  
28 54(5), 743-749.  
29  
30  
31  
32  
33  
34  
35  
36  
37  
38  
39  
40  
41  
42  
43  
44  
45  
46  
47  
48  
49  
50  
51  
52  
53  
54  
55  
56  
57  
58  
59  
60



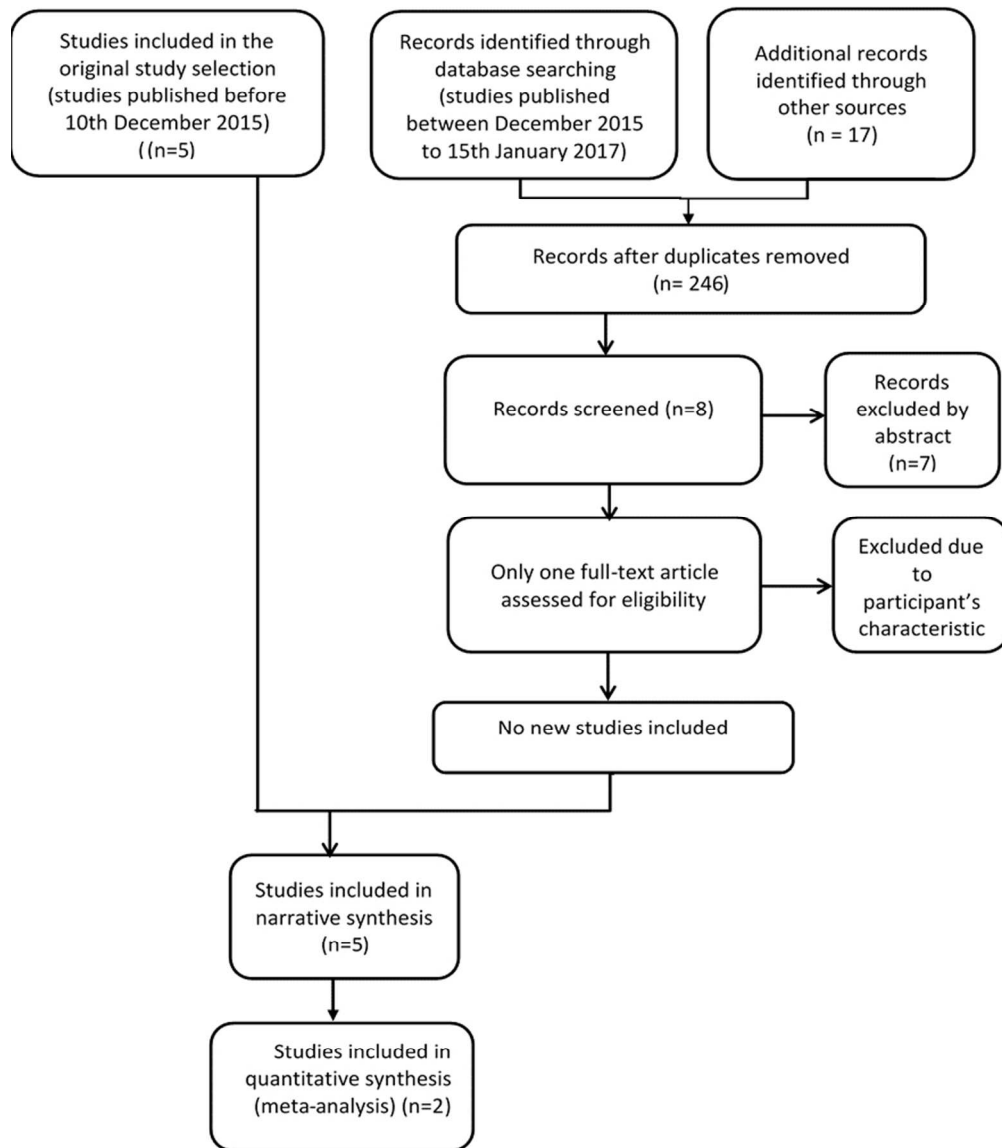

Figure1: Study selection flow diagram [48].

1  
2  
3  
4  
5  
6  
7  
8  
9  
10  
11  
12  
13  
14  
15  
16  
17  
18  
19  
20  
21  
22  
23  
24  
25  
26  
27  
28  
29  
30  
31  
32  
33  
34  
35  
36  
37  
38  
39  
40  
41  
42  
43  
44  
45  
46  
47  
48  
49  
50  
51  
52  
53  
54  
55  
56  
57  
58  
59  
60

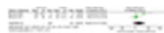

Figure 2: 6 minute walk test (metres) at 6 months.

6x1mm (300 x 300 DPI)

For peer review only

1  
2  
3  
4 **Effect of physical activity and dietary restriction interventions on the musculoskeletal**  
5 **function of overweight and obese elders with knee osteoarthritis: protocol for a**  
6 **systematic review**  
7

8 *Asma Alrushud, Alison Rushton, Carolyn Anne Greig*  
9

---

10  
11  
12  
13 **Citation**

14 Asma Alrushud, Alison Rushton, Carolyn Anne Greig. **Effect of physical activity and dietary restriction**  
15 **interventions on the musculoskeletal function of overweight and obese elders with knee**  
16 **osteoarthritis: protocol for a systematic review.**  
17

18 **Review question(s)**

19 What is the effect of combined physical activity and dietary restriction programmes on the musculoskeletal  
20 function of overweight and obese elders with knee osteoarthritis?  
21

22 **Searches**

23 Cochrane databases Ovid (MEDLINE), EMBASE Web of science and CINAHL will be searched with a  
24 search strategy comprising comprehensive keyword combinations for each of the concepts of interest: 1)  
25 knee osteoarthritis, 2) physical activity, 3) dietary restriction, 4) ageing 5) musculoskeletal function. There  
26 will be no language, publication status or publication year limitations.  
27

28 **Types of study to be included**

29 Randomised control trials.

30 **Condition or domain being studied**

31 Musculoskeletal function of overweight and obese elders with knee osteoarthritis.

32 **Participants/ population**

33 Older men or women aged  $\geq 55$  years with BMI  $\geq 25$  Kg/m<sup>2</sup> and diagnosed (radiographically) with either  
34 unilateral or bilateral knee osteoarthritis.

35 **Intervention(s), exposure(s)**

36 Physical activity combined with dietary restriction programmes.

37 **Comparator(s)/ control**

38 Usual care.

39 Usual care may constitute non intervention e.g. advice, or an intervention which may include physical  
40 activity alone or dietary restriction alone.  
41

42 **Outcome(s)**

43 Body weight, Body Mass Index, musculoskeletal function (mobility, knee range of movement, muscle  
44 strength), pain and quality of life.

45 **Data extraction, (selection and coding)**

46 A customised data extraction form including: demographic information, methodology, interventions details  
47 and all specified reported outcomes has been designed and will be used by the reviewers. Two reviewers  
48 will independently extract data. The accuracy and clarity of the extracted data will be checked by a third  
49 reviewer.  
50

51 **Risk of bias (quality) assessment**

52 The Cochrane risk of bias assessment tool will be used to appraise the internal validity of each included  
53 trial. All domains of the bias tool will be assessed independently. The blinding domain will be divided into 2  
54 items, one for the blinding of participants and personnel and the other for blinding of the outcome  
55 assessors. Two independent reviewers will assess the risk of bias and in case of disagreement a third  
56 reviewer will be consulted.  
57

58  
59 **Strategy for data synthesis**

60 Data synthesis is anticipated to be narrative based on a scoping search of the literature.

If possible, a meta-analysis will be conducted (if included trials are of sufficient number, with comparable interventions and outcomes, and of acceptable risk of bias).

#### **Analysis of subgroups or subsets**

Not anticipated.

#### **Dissemination plans**

A poster of progress will be presented in MRC Arthritis Research UK Centre for Musculoskeletal Ageing Research (CMAR/CIMA) Conference on 15th – 16th April and the University of Birmingham's Research Poster Conference on 16<sup>th</sup> June 2015. After completing the work, an article will be submitted for publication in peer reviewed journal.

#### **Contact details for further information**

Corresponding author: Alrushud AS, [asa314@student.bham.ac.uk](mailto:asa314@student.bham.ac.uk)

Emails: [c.a.greig@bham.ac.uk](mailto:c.a.greig@bham.ac.uk); [a.b.rushton@bham.ac.uk](mailto:a.b.rushton@bham.ac.uk)

Telephone [+44 \(0\)121 414 8743](tel:+44(0)1214148743)

#### **Organisational affiliation of the review**

School of Sport, Exercise and Rehabilitation Sciences, College of Life and Environmental Sciences, University of Birmingham, Edgbaston, Birmingham, B15 2TT, UK

#### **Review team**

Ms Asma Alrushud,

Dr Alison Rushton,

Dr Carolyn Greig,

#### **Anticipated or actual start date**

1 November 2014

#### **Anticipated completion date**

30 April 2015

#### **Funding sources/sponsors**

This review is a part of a PhD program undertaken by Alrushud, and is fully funded by the King Saud University, Kingdom of Saudi Arabia, Riyadh and the Saudi Arabian Cultural Bureau, United Kingdom, London.

#### **Conflicts of interest**

None.

#### **Language**

English

#### **Country**

United Kingdom

#### **Subject index terms status**

Subject indexing assigned by CRD

#### **Subject index terms**

Knee osteoarthritis, elders, overweight, obese, musculoskeletal function, dietary restriction, physical activity.

#### **Stage of review**

Continuous.

#### **Date of registration in PROSPERO**

31 March 2015

#### **Date of publication of this revision**

Not applicable

#### **Stage of review at time of this submission**

|                                                                 | <b>Started</b> | <b>Completed</b> |
|-----------------------------------------------------------------|----------------|------------------|
| Preliminary searches                                            | Yes            | Yes              |
| Piloting of the study selection process                         | Yes            | Yes              |
| Formal screening of search results against eligibility criteria | Yes            | Yes              |
| Data extraction                                                 | Yes            | No               |

|    |                                   |     |    |
|----|-----------------------------------|-----|----|
| 1  |                                   |     |    |
| 2  |                                   |     |    |
| 3  |                                   |     |    |
| 4  | Risk of bias (quality) assessment | Yes | No |
| 5  |                                   |     |    |
| 6  | Data analysis                     | No  | No |
| 7  |                                   |     |    |
| 8  |                                   |     |    |
| 9  |                                   |     |    |
| 10 |                                   |     |    |
| 11 |                                   |     |    |
| 12 |                                   |     |    |
| 13 |                                   |     |    |
| 14 |                                   |     |    |
| 15 |                                   |     |    |
| 16 |                                   |     |    |
| 17 |                                   |     |    |
| 18 |                                   |     |    |
| 19 |                                   |     |    |
| 20 |                                   |     |    |
| 21 |                                   |     |    |
| 22 |                                   |     |    |
| 23 |                                   |     |    |
| 24 |                                   |     |    |
| 25 |                                   |     |    |
| 26 |                                   |     |    |
| 27 |                                   |     |    |
| 28 |                                   |     |    |
| 29 |                                   |     |    |
| 30 |                                   |     |    |
| 31 |                                   |     |    |
| 32 |                                   |     |    |
| 33 |                                   |     |    |
| 34 |                                   |     |    |
| 35 |                                   |     |    |
| 36 |                                   |     |    |
| 37 |                                   |     |    |
| 38 |                                   |     |    |
| 39 |                                   |     |    |
| 40 |                                   |     |    |
| 41 |                                   |     |    |
| 42 |                                   |     |    |
| 43 |                                   |     |    |
| 44 |                                   |     |    |
| 45 |                                   |     |    |
| 46 |                                   |     |    |
| 47 |                                   |     |    |
| 48 |                                   |     |    |
| 49 |                                   |     |    |
| 50 |                                   |     |    |
| 51 |                                   |     |    |
| 52 |                                   |     |    |
| 53 |                                   |     |    |
| 54 |                                   |     |    |
| 55 |                                   |     |    |
| 56 |                                   |     |    |
| 57 |                                   |     |    |
| 58 |                                   |     |    |
| 59 |                                   |     |    |
| 60 |                                   |     |    |

For peer review only





# BMJ Open

## The effect of physical activity and dietary restriction interventions on weight loss and the musculoskeletal function of overweight and obese elders with knee osteoarthritis: a systematic review and mixed method data synthesis

|                                 |                                                                                                                                                                                                                                                                                                                                                                                                                                                                                                                                                                                                                                                                                                                                                                                    |
|---------------------------------|------------------------------------------------------------------------------------------------------------------------------------------------------------------------------------------------------------------------------------------------------------------------------------------------------------------------------------------------------------------------------------------------------------------------------------------------------------------------------------------------------------------------------------------------------------------------------------------------------------------------------------------------------------------------------------------------------------------------------------------------------------------------------------|
| Journal:                        | <i>BMJ Open</i>                                                                                                                                                                                                                                                                                                                                                                                                                                                                                                                                                                                                                                                                                                                                                                    |
| Manuscript ID                   | bmjopen-2016-014537.R2                                                                                                                                                                                                                                                                                                                                                                                                                                                                                                                                                                                                                                                                                                                                                             |
| Article Type:                   | Research                                                                                                                                                                                                                                                                                                                                                                                                                                                                                                                                                                                                                                                                                                                                                                           |
| Date Submitted by the Author:   | 24-Mar-2017                                                                                                                                                                                                                                                                                                                                                                                                                                                                                                                                                                                                                                                                                                                                                                        |
| Complete List of Authors:       | Alrushud, Asma; School of Sport, Exercise and Rehabilitation Sciences, University of Birmingham, Edgbaston, Birmingham, B15 2TT, UK<br>Rushton, Alison; School of Sport, Exercise and Rehabilitation Sciences, University of Birmingham, Edgbaston, Birmingham, B15 2TT, UK; MRC-Arthritis Research UK Centre for Musculoskeletal Ageing Research<br>Kanavaki, Archontissa; School of Sport, Exercise and Rehabilitation Sciences, University of Birmingham, Edgbaston, Birmingham, B15 2TT, UK; MRC-Arthritis Research UK Centre for Musculoskeletal Ageing Research<br>Greig, Carolyn; School of Sport, Exercise and Rehabilitation Sciences, University of Birmingham, Edgbaston, Birmingham, B15 2TT, UK; MRC-Arthritis Research UK Centre for Musculoskeletal Ageing Research |
| <b>Primary Subject Heading</b>: | Geriatric medicine                                                                                                                                                                                                                                                                                                                                                                                                                                                                                                                                                                                                                                                                                                                                                                 |
| Secondary Subject Heading:      | Sports and exercise medicine, Occupational and environmental medicine                                                                                                                                                                                                                                                                                                                                                                                                                                                                                                                                                                                                                                                                                                              |
| Keywords:                       | Rehabilitation medicine < INTERNAL MEDICINE, Knee < ORTHOPAEDIC & TRAUMA SURGERY, Musculoskeletal disorders < ORTHOPAEDIC & TRAUMA SURGERY                                                                                                                                                                                                                                                                                                                                                                                                                                                                                                                                                                                                                                         |
|                                 |                                                                                                                                                                                                                                                                                                                                                                                                                                                                                                                                                                                                                                                                                                                                                                                    |

SCHOLARONE™  
Manuscripts



1  
2  
3 **The effect of physical activity and dietary restriction interventions on**  
4 **weight loss and the musculoskeletal function of overweight and obese elders**  
5 **with knee osteoarthritis: a systematic review and mixed method data**  
6 **synthesis**  
7  
8  
9

10  
11 Asma S Alrushud<sup>1</sup>, Alison B Rushton<sup>1,2</sup>, Archontissa M Kanavaki<sup>1,2</sup> and Carolyn A Greig<sup>1,2</sup>.

12 <sup>1</sup>School of Sport, Exercise and Rehabilitation Sciences, <sup>2</sup>MRC-Arthritis Research UK Centre  
13 for Musculoskeletal Ageing Research, University of Birmingham, Edgbaston, Birmingham,  
14 B15 2TT, UK  
15  
16

17  
18  
19 **Corresponding author**

20 Asma S Alrushud, School of Sport, Exercise and Rehabilitation Sciences, University of  
21 Birmingham, Edgbaston, Birmingham BH15 2TT.

22 **Email:** [asa314@student.bham.ac.uk](mailto:asa314@student.bham.ac.uk)

23 **Telephone number:** +44 121 414 8743  
24  
25

26 **Keywords**

27 Exercise, diet, elderly, obesity, randomised controlled trials  
28  
29

30 **Word count**

31 4,600  
32

33 Number of figures: 2  
34

35 Number of tables: 8 within the text  
36

37 Number of references: 50  
38

39 Number of supplementary files 4 (SR protocol, PRISMA 2009 checklist, cover letter, BMJ  
40 response letter).  
41  
42  
43  
44  
45  
46  
47  
48  
49  
50  
51  
52  
53  
54  
55  
56  
57  
58  
59  
60

**ABSTRACT****Background**

Despite the clinical recommendation of exercise and diet for people with knee osteoarthritis (OA) there are no systematic reviews synthesising the effectiveness of combining physical activity and dietary restriction interventions on the musculoskeletal function of overweight and obese elders with knee OA.

**Objective**

To evaluate the effectiveness of combined physical activity and dietary restriction programmes on body weight, body mass index (BMI) and the musculoskeletal function of overweight and obese elders with knee OA.

**Information sources**

A detailed search strategy was applied to key electronic databases (Ovid, Embase, Web of Science and CINAHL) for randomised controlled trials (RCTs) published in English prior to 15<sup>th</sup> January 2017.

**Participants**

Participants with BMI  $\geq 25 \text{ kg.m}^{-2}$ , aged  $\geq 55$  years of age and radiographic evidence of knee OA.

**Interventions**

Physical activity plus dietary restriction programmes with usual care or exercise as the comparators.

**Outcome measures**

Primary outcome measures were body weight, BMI, or musculoskeletal function. Secondary outcome measures were pain and quality of life (QOL).

**Results**

One pilot and two definitive trials with  $n=794$  participants were included. Two articles reporting additional data and outcome measures for one of the RCTs were identified. All included RCTs had an unclear risk of bias. Meta-analysis was only possible to evaluate mobility (6 min walk test) at 6 months and the pooled random effect 15.05 (95% CI -11.77 to 41.87) across 2 trials with  $n=155$  participants did not support the combined intervention programme. Narrative synthesis showed clear differences in favour of a reduced body weight and an increased 6 minute walk in the intervention group compared with control groups.

**Conclusion**

The quality of evidence of benefit of combining exercise and dietary interventions in older overweight/ obese adults with knee OA is unclear. Protocol was registered in PROSPERO (CRD42015019088).

**Article summary****Strengths and limitations of the review**

- This is the first systematic review of combined physical activity and dietary restriction interventions in overweight and obese older adults with knee OA.
- The protocol of this review was registered in PROSPERO and followed the PRISMA guidelines and the Cochrane handbook; GRADE was used to evaluate the quality of the included trials.
- The review included a mixed methods analytical approach.
- Few eligible studies were identified however important information is highlighted which could inform clinical practice.

## INTRODUCTION

### Rationale

Current evidence shows that the burden of chronic musculoskeletal conditions especially osteoarthritis (OA) increases with advancing age [1]. OA is the most common type of arthritis affecting older adults. It is a degenerative joint disease that may affect any joint within the body causing chronic pain, functional limitation and emotional disturbance, and may lead to disability and negatively affect quality of life (QOL) [2-5]. Knee OA is a common condition in older adults affecting about 3.64% of the global population in 2010 [6, 7]. In the United Kingdom (UK) there is approximately 4.7 million older adults aged 45 years or over experiencing knee OA symptoms [1, 8]. In addition, more than 20 million people seek treatment for knee OA in the United States (US) [9, 10]. Given the increasing numbers of older adults in the population, combined with the increasing prevalence of obesity and being overweight throughout the population, it is anticipated that the incidence of knee OA will increase rapidly over the next decade [8].

Unfortunately, there is no specific treatment for knee OA. Most recommendations describe three treatment modalities: non-pharmacological, pharmacological and surgical [11, 12]. Most knee OA evidence-based guidelines recommend nonsurgical treatment [13, 14] and most general practitioners prefer the non-pharmacological and non-surgical interventions as the first line of treatment (recognised as 'usual care') [11]. These interventions are focused on patient education, self-management, pain reduction, function and QOL improvement, body weight reduction and exercise (either land-based or water-based) [1, 14-17]. It is well known that obesity is an important risk factor for knee OA progression and several studies recommend obesity control for decreasing disease burden, since a decrease in body weight will lead to a reduction of joint load and inflammation [3, 14, 17, 18]. Weight reduction could be considered as a functional treatment in knee OA rehabilitation since a 12-15% reduction compared with initial body weight has been shown to improve function and reduce pain [19]. Moreover, the appropriate percentage of body weight reduction has been investigated in a systematic review and meta-analysis of five randomised control trials (RCTs) [20]. The review concluded that professional treatment of knee OA should include a weight reduction plan and patients should be encouraged to lose at least 5% of body weight over a 20-week period to achieve symptomatic relief [20].

In addition to weight reduction, clinical guidelines for knee OA management and level 1 evidence recommend exercise therapy as the main intervention [20-24]. Moderate intensity aerobic exercise (e.g. walking) is recommended to maintain musculoskeletal function and reduce pain [20-22]. However, the optimal exercise prescription for older adults is still unclear and further research is required [7]. The demand for optimal exercise is increased in obese patients who may face more challenges and believe in the greater importance of physical activity compared with dietary intervention [25, 26].

Clinically combining a weight loss programme with exercise therapy may help overweight and obese elders with knee OA to achieve a 10% loss of total body weight as well as safely relieve knee OA symptoms [3]. Also, a recent RCT which included older adults has shown that a non-surgical treatment programme had longer-lasting beneficial effects, evidenced by a delayed requirement for elective total knee replacement (TKR) surgery in a secondary health care setting [27]. Moreover, for those who are eligible for unilateral TKR, non-surgical intervention may delay their surgical intervention for several months [28]. There are no systematic literature reviews synthesising the evidence of the effectiveness of combining

1  
2  
3 physical activity and dietary restriction interventions on the musculoskeletal function of  
4 overweight and obese elders with knee OA.

5 The aim of this review was to evaluate the effectiveness of combined physical activity and  
6 dietary restriction programmes on the musculoskeletal function of overweight and obese  
7 elders with body mass index (BMI)  $\geq 25 \text{ kg.m}^{-2}$ , aged  $\geq 55$  years of age, and with radiographic  
8 evidence of knee OA.  
9

### 10 11 **Objective**

12 To evaluate the effectiveness of combined physical activity and dietary restriction  
13 programmes on body weight, BMI and the musculoskeletal function of overweight and obese  
14 elders with knee OA.  
15

## 16 17 **METHODS**

### 18 **Protocol and registration**

19 A systematic review was conducted according to a pre-defined protocol following the  
20 Preferred Reporting Items for Systematic Reviews and Meta-Analyses (PRISMA)-P  
21 guidelines [29] and the Cochrane handbook [30]. The review was registered on PROSPERO  
22 on 1/4/2015 (CRD42015019088), and is reported in accordance with the PRISMA statement  
23 [29].  
24  
25

### 26 **Eligibility criteria**

#### 27 Inclusion criteria

- 28 • Older adults (aged  $\geq 55$  years, men and women).
- 29 • Overweight or obese with BMI  $\geq 25 \text{ Kg.m}^{-2}$  [3].
- 30 • Radiographic evidence of tibiofemoral OA (unilateral or bilateral), grade I-III (mild to  
31 moderate) according to the Kellgren and Lawrence system for knee OA classification  
32 [31].  
33  
34

#### 35 Exclusion criteria

- 36 • Full article not written in English.  
37

#### 38 Studies

39 Randomised controlled trials.  
40

#### 41 Interventions

42 Combined physical activity and dietary restriction programmes.  
43

#### 44 Comparators

45 Usual care (including advice or physical activity alone or dietary restriction alone) or exercise  
46 (participants received an exercise programme similar to the intervention group).  
47  
48

### 49 **Outcome measures**

50 Primary outcome measures: Body weight, BMI, musculoskeletal function either self-reported  
51 function or objective functional performance measures, also, including mobility, joint range  
52 of motion (ROM) and muscle strength.  
53

54 Secondary outcome measures: Pain and QOL.  
55  
56  
57  
58  
59  
60

### Information sources

The search employed sensitive, topic-based strategies designed for each database (to 10<sup>th</sup> December 2015):

- The Cochrane Library: Controlled Trials Register, NHS Economic Evaluation Database.
- CINAHL, EMBASE, MEDLINE, WEB OF SCIENCE.
- Hand searches in key journals and lists of references.
- Unpublished research and grey literature such as Open Grey.
- Government, Official, Organizational such as UK department of health, World Health Organization and NHS (UK).
- Clinical trials registration, theses abstracts and Google scholar.

### Search

Search strategies of predefined search terms were developed and tested for applicability (ASA, and a specialist librarian from the University of Birmingham on 13<sup>th</sup> February 2015). The definitive search strategy was run by two independent researchers (ASA/AMK, 10<sup>th</sup> December 2015). Endnote X7 software was used for data management. Search results were imported and duplicates were removed. An example of the Medline Ovid search strategy is presented in Table 1. The search was updated on (15<sup>th</sup> January 2017) to include studies published in 2016 by (ASA/AMK) and no eligible studies were identified.

Table 1: Example of Medline Ovid search strategy 1948- 10th December 2015

| #  | Searches                                                                                                                                                                                              |
|----|-------------------------------------------------------------------------------------------------------------------------------------------------------------------------------------------------------|
| 1  | Physical activity/                                                                                                                                                                                    |
| 2  | Physical* adj2 (activity or training or therapy*)                                                                                                                                                     |
| 3  | (Exercis* or rehabilitation* or treatment*)                                                                                                                                                           |
| 4  | (Closed kinetic chain* or open kinetic chain* or isokinetic* or isometric* or anaerobic* or muscle* or stretching* or aerobic* or isotonic* or treadmill* or endurance* or walking*) adj1 (exercise*) |
| 5  | (Resist* adj2 (exercise* or therapy or training))                                                                                                                                                     |
| 6  | 1 or 2 or 3 or 4 or 5                                                                                                                                                                                 |
| 7  | Dietary restriction .mp.                                                                                                                                                                              |
| 8  | Meal replacement.mp.                                                                                                                                                                                  |
| 9  | Weight loss/ or weight loss.mp. or intentional weight loss.mp.                                                                                                                                        |
| 10 | Caloric Restriction/ or Obesity/ or Body Weight/ or hypo or hypochloric diet/                                                                                                                         |
| 11 | Energy intake/ or adipos*/ or Body Mass Index/ or Overweight/                                                                                                                                         |
| 12 | Diet/ or Diet, Carbohydrate-Restricted/ or Diet, Reducing/ or Diet Therapy/ or Diet, Vegetarian/                                                                                                      |
| 13 | Obesity/ or obesity.mp.                                                                                                                                                                               |
| 14 | ((Low carbohydrate* or low calor* or low fat* or vegetarian*) adj1 (diet*))                                                                                                                           |
| 15 | (Diet adj2 (therapy* or treatment*))                                                                                                                                                                  |
| 16 | 7 or 8 or 9 or 10 or 11 or 12 or 13 or 14 or 15                                                                                                                                                       |
| 17 | Aging/                                                                                                                                                                                                |
| 18 | Exp aged/                                                                                                                                                                                             |
| 19 | (55 adj2 (year* or age* or old*))                                                                                                                                                                     |
| 20 | (old* adj (adult* or people or person* or population* or men or women))                                                                                                                               |
| 21 | (aging* adj (adult* or people or person* or population* or men or women))                                                                                                                             |

|    |                                                                                                  |
|----|--------------------------------------------------------------------------------------------------|
| 22 | (elder* or senior* or geriatric* ?enarian or ageing)                                             |
| 23 | (age* or aging or old* or elder*) adj1 (muscle*)                                                 |
| 24 | 17 or 18 or 19 or 20 or 21 or 22 or 23                                                           |
| 25 | Pain/ or Knee Joint/ or Knee pain.mp. or Osteoarthritis, knee/                                   |
| 26 | Knee osteoarthritis.mp. or Osteoarthritis, knee/                                                 |
| 27 | (Knee* adj (arthritis or osteoarthritis* or inflammation* or degeneration* or disease or pain*)) |
| 28 | (radiographic* or symptomatic* or clinical* adj1 (knee osteoarthritis*))                         |
| 29 | 25 or 26 or 27 or 28                                                                             |
| 30 | Musculoskeletal function .mp.                                                                    |
| 31 | Muscle function .mp.                                                                             |
| 32 | Body composition/                                                                                |
| 33 | Mobility.mp.                                                                                     |
| 34 | (Gait or walking) adj1 (speed)                                                                   |
| 35 | Functional ability.mp.                                                                           |
| 36 | “Activity of daily” living/ or .mp.                                                              |
| 37 | “Quality of life”/                                                                               |
| 38 | Balance.mp.                                                                                      |
| 39 | (musculoskeletal adj2( pain or disorder* ))                                                      |
| 40 | (Muscle* adj (power or strength or performance or function or weakness))                         |
| 41 | 41. 30 or 31 or 32 or 33 or 34 or 35 or 36 or 37 or 38 or 39 or 40                               |
| 42 | 6 and 16 and 24 and 29 and 41                                                                    |

### Study selection

The eligibility of included studies was independently assessed by two reviewers (ASA/AMK) according to the eligibility criteria. The reviewers screened the results of the search by titles and abstracts, and then full text. A study was considered to be eligible when both reviewers assessed the full text independently and found it to fulfil the eligibility criteria. A third reviewer (CAG) mediated in the case of disagreement. The inter-rater agreement was evaluated using Cohen’s Kappa measure [32].

### Data collection

Using a standardised form (developed by ASA) based on the Cochrane Consumers and Communication Review Group’s data extraction template [33], two reviewers (ASA/AMK) extracted data independently. A third reviewer (CAG) checked for consistency and clarity.

### Data items

Items reported on the data extraction form for each trial included demographic information, methodology, intervention details and all specified reported outcomes.

### Risk of bias in individual trials

The internal validity of each included trial was assessed using the Cochrane risk of bias assessment tool [34] recommended by PRISMA [29]. All domains of the risk of bias tool were assessed independently by two reviewers (ASA/CAG). A third reviewer (ABR) mediated in the case of disagreement.

### Risk of bias across trials

Risk of bias was considered high if the proportion of information from trials with high risk of bias was sufficient to affect the interpretation of the results. Risk of bias was considered

unclear if most information was from studies with a low or unclear risk of bias, and low if most information was from studies with a low risk of bias [34].

### Summary measures

Following data extraction, meta-analysis was possible for one key outcome measure across trials that applied similar interventions and compared with exercise at one assessment time-point (6 months). Meta-analysis was conducted using RevMan to assess the effectiveness of a combined intervention programme of diet and exercise on mobility (6-minute walk test at 6 months) using the random effects model [35, 36]. Ninety-five percent confidence intervals were reported for the summary statistics and the standard deviation was calculated from the standard errors and confidence interval [37, 38]. Data for the other outcomes were available, but meta-analyses were not possible due to different assessment points or comparators. A modified narrative synthesis was used to present these data [39, 40].

### Synthesis of results

A mixed method analysis was required to synthesise the available data [35-40]. For the meta-analysis, no raw data were available, and therefore data analyses were conducted on the final summary statistics reports. Standard deviations were estimated from reported SE and CI for all available data [36]. Heterogeneity in treatment effects was considered by computation of  $I^2$ . An analysis of the quality of the interventions was undertaken as the basis for interpretation of heterogeneity [36, 37]. For the modified narrative synthesis, change scores were used for trials when no other data were available [36-38]. Two stages of a narrative synthesis were possible to apply; these comprised the development of a preliminary synthesis of findings of included trials, and an exploration of the relationships within and between trials [39, 40].

#### Developing a preliminary synthesis

A preliminary synthesis was developed using tabulation, textual description, grouping and clusters and data transformation. Tables were designed presenting the main characteristics of the eligible studies including eligibility criteria, intervention (number of participants, goal of weight loss, intervention period, setting, and brief information about exercise and diet intervention), comparator, outcome measures and the main findings. Additional tables were used to organise studies with respect to specific outcome measures (primary or secondary) and the comparator group. Results were presented as mean (SD) by converting the continuous data from standard errors or confidence intervals to SD [39, 40].

#### Exploring the relationships within and between trials

A visual representation of the relationship between study characteristics and results was used to explore the relationships within and between trials [39, 40].

### Additional analyses

The Grading of Recommendation, Assessment, Development, and Evaluation (GRADE) approach was used to evaluate the quality of evidence included in the meta-analysis [41, 42]. Specific software (GRADEpro) was used [43]. This approach provided a system for rating the quality of evidence and determining the strength of recommendations for clinical practice guidelines [41, 42]. It has five components: risk of bias, inconsistency, indirectness, imprecision and publication bias. Quality of evidence was categorised as 'high', 'moderate', 'low' and 'very low' [41, 42]. Each RCT evaluated as 'high' quality evidence was modified according to five negative and two positive factors [41, 42].

1  
2  
3 The Cochrane risk of bias assessment tool was used for this component [34]. According to  
4 the software risk of bias was classified as not-serious, serious or very serious. The quality of  
5 evidence was downgraded by one level if there was a serious limitation or by two levels if the  
6 limitation was very serious [41, 42]. Inconsistency was evaluated according to  $I^2$  statistics. It  
7 may be considered low if  $I^2 < 40\%$ , moderate if  $I^2 = 30-60\%$ , substantial if  $I^2 = 50-90\%$  and  
8 considerable if  $I^2 = 75-100\%$  [42]. Inconsistency was considered as unserious if the reviewers  
9 were able to identify a plausible explanation for the heterogeneity and the quality of evidence  
10 was not downgraded [42]. Otherwise, the quality of evidence was downgraded by one or two  
11 levels if inconsistency of the results was classified as serious or very serious [42]. The quality  
12 of evidence was downgraded by one or two levels if there was indirectness between the study  
13 question and the applicability of the evidence [41].  
14  
15

16 Imprecision of evidence was downgraded in the presence of the following conditions: First,  
17 when the boundaries of the CI crossed the no effect line (threshold is completely within the  
18 recommended effect) and second, when the criteria for optimal information size (OIS) were  
19 not met [42]. The criterion for OIS was that the total number of participants included in a  
20 systematic review (calculated from a meta-analysis) was less than the number of participants  
21 generated by a conventional sample size calculation for a single adequately powered trial.  
22 Imprecision was downgraded by one level if one of these conditions was not met or by two  
23 levels if both conditions were not met [41, 42].  
24  
25

26 Publication of bias was undetectable or strongly suspected according to GRADE software  
27 [43]. The selective outcome reporting domain of the Cochrane risk of bias assessment tool  
28 was used to evaluate the publication bias [34, 42]. The quality of evidence was downgraded  
29 by one level if the selective outcome reporting domain was evaluated as unclear without  
30 justification or downgraded by two levels if evaluated as high [42].  
31  
32  
33  
34

## 35 RESULTS

### 36 Study selection

37 Three RCTs ( $n = 794$ ) were included. One was a pilot trial [44] and two were definitive trials:  
38 the Arthritis, Diet and Activity Promotion Trial (ADAPT) [45] and the Intensive Diet and  
39 Exercise for Arthritis (IDEA) [3]. For the ADAPT, there was a main trial report, and two  
40 additional articles with further analyses of additional outcome measures [46, 47]. The trials  
41 used two comparators: An exercise programme in the pilot study and IDEA trial [3, 44],  
42 while usual care (healthy lifestyle) was the comparator in ADAPT [45]. All of the included  
43 trials were conducted by the same group from the USA and published in English. No relevant  
44 unpublished studies were identified. The inter-rater agreement of the study selection process  
45 was excellent with  $k = 0.82$  [32]. There was one disagreement requiring consultation with the  
46 third reviewer (CAG) who was asked to clarify the eligibility of articles reporting the same  
47 trials. Specifically, one pilot study by Messier et al., (2000) [44] did not clarify whether it  
48 was an external or internal pilot study. The senior author was contacted twice but no response  
49 was received. The third reviewer recommended it be treated as an external pilot study as there  
50 was nothing to indicate it was an internal pilot study in the article reporting the main trial  
51 (Messier et al., 2004) [45]. The study flow diagram is presented in Figure1 [48].  
52  
53  
54  
55  
56  
57  
58  
59  
60



1  
2  
3  
4  
5  
6  
7  
8  
9  
10  
11  
12  
13  
14  
15  
16  
17  
18  
19  
20  
21  
22  
23  
24  
25  
26  
27  
28  
29  
30  
31  
32  
33  
34  
35  
36  
37  
38  
39  
40  
41  
42  
43  
44  
45  
46  
47  
48  
49  
50  
51  
52  
53  
54  
55  
56  
57  
58  
59  
60

**Study characteristics**

The main characteristics of the included trials are presented in Table 2

For peer review only

Table 2: Descriptive data for the included trials

| Title/Author/year                                                                                                | Aim                                                                                                                                                                                                                                                                                                              | Eligibility criteria                                                                                                                                                                                                                                                                                                                                                                                                                                                                                                                                                  | Methods                                                                                                                                                                                                                                                                                                                                                                                                                                                                                                                                                                                                                                    | Comparator               | Outcome measures                                                                                                                                                                                                                                                                                                                                                                                                                                                                                                                                                           | Assessment points                          | Result                                                                                                                                                                                                                                                                                                                                                                                                                                                                                                                                                                                                                                                                                                                                                                                                                                                                                                                                                                             |
|------------------------------------------------------------------------------------------------------------------|------------------------------------------------------------------------------------------------------------------------------------------------------------------------------------------------------------------------------------------------------------------------------------------------------------------|-----------------------------------------------------------------------------------------------------------------------------------------------------------------------------------------------------------------------------------------------------------------------------------------------------------------------------------------------------------------------------------------------------------------------------------------------------------------------------------------------------------------------------------------------------------------------|--------------------------------------------------------------------------------------------------------------------------------------------------------------------------------------------------------------------------------------------------------------------------------------------------------------------------------------------------------------------------------------------------------------------------------------------------------------------------------------------------------------------------------------------------------------------------------------------------------------------------------------------|--------------------------|----------------------------------------------------------------------------------------------------------------------------------------------------------------------------------------------------------------------------------------------------------------------------------------------------------------------------------------------------------------------------------------------------------------------------------------------------------------------------------------------------------------------------------------------------------------------------|--------------------------------------------|------------------------------------------------------------------------------------------------------------------------------------------------------------------------------------------------------------------------------------------------------------------------------------------------------------------------------------------------------------------------------------------------------------------------------------------------------------------------------------------------------------------------------------------------------------------------------------------------------------------------------------------------------------------------------------------------------------------------------------------------------------------------------------------------------------------------------------------------------------------------------------------------------------------------------------------------------------------------------------|
| Exercise and weight loss in obese older adults with knee OA: a preliminary study.<br>Messier et al., (2000) [44] | 1] To determine if a combined dietary and exercise intervention results in significant weight loss in older obese adults with knee OA<br>2] To compare the effects of exercise plus dietary therapy with exercise alone on gait, strength, knee pain, biomarkers of cartilage degradation, and physical function | <b>Inclusion</b><br>Aged $\geq 60$ years<br>$BMI \geq 28 \text{ kg.m}^2$<br>Knee pain, radiographic evidence of knee OA.<br>Self-reported physical disability<br><b>Exclusion</b><br>Serious medical condition affecting safety<br>Planned change of abode or admission to a nursing home within next 6 months. Unable to walk at least 420ft in 6 minutes without assistive device<br>Unable to walk on treadmill without assistive device<br>Current participation in an exercise programme or other study.<br>Unable to participate or complete the study protocol | <b>Participants</b><br>N=24 community-dwelling obese older adults<br><b>Goal of weight loss</b><br>15 lb (6.8 kg)<br><b>Period of intervention</b><br>6 months<br><b>Setting</b><br>University Health and Exercise Science Centre, USA<br><b>Exercise</b><br>Combined weight training and walking programme for 1 hour three times per week<br><b>Dietary intervention</b><br>Nutrition class 1 hour/week to instruct participants how to modify caloric intake utilising cognitive behaviour modification to change dietary habits to reach a group goal of an average weight loss then 3 group and one individual session held per month | Exercise group (control) | Body weight, self-report questionnaire, physical performance and gait analysis<br><br>Synovial fluid biomarkers (total proteoglycan (PG), keratan sulphate (KS) and interleukin-1 $\beta$ (IL-1))<br><br>Frequency and intensity of knee pain (Likert scale)<br><br>Disability by self-reported physical function using the Fitness Arthritis and Seniors Trial (FAST)<br><br>6 minute walk test and timed stair climbing to measure physical performance<br><br>Kinetics and kinematics analysis of gait using motion analysis and force plate recorded at 3 and 6 months | Data recorded at base line, 3 and 6 months | Body weight reduced significantly in diet plus exercise group compared with exercise group with (P=.007)<br><br>Within group differences:<br>The combined intervention group lost a mean of 18.8 lb (8.5 kg) at 6 months compared with 4.0 lb (1.8 kg) in the exercise group (P =.01)<br><br>No statistical differences were found between groups in self-reported performance measures of physical function and knee strength<br><br>Statistically significant improvement in both groups in self-reported disability and knee pain intensity and frequency and physical performance<br><br>At 6 months, the combined intervention group had a significantly greater loading rate (P =.03) and maximum braking force (P =.01) during gait<br><br>No statistical differences were found between groups in knee pain scores<br><br>Concentration level of keratan sulphate decreased similarly in both groups. The decrease in IL-1 correlated with joint pain (r = -0.77, P =.043) |

1  
2  
3  
4

| Title/Author/<br>year                                                                                                         | Aim                                                                                                                                                                                                                                           | Eligibility criteria                                                                                                                                                                                                                                                                                                                                                                                                                                                                                                                                                                                                                                                                                                                                                    | Methods                                                                                                                                                                                                                                                                                                                                                                                                                                                                                                                                                                                                                                                                                                                                                                                                                                                  | Comparator                                                                                     | Outcome measures                                                                                                                                                                                                                                                                                      | Assessment points                          | Result                                                                                                                                                                                                                                                                                                                                                                                                                                                                                                                                                                                                                                                                                                                                                                                                                                                                                             |
|-------------------------------------------------------------------------------------------------------------------------------|-----------------------------------------------------------------------------------------------------------------------------------------------------------------------------------------------------------------------------------------------|-------------------------------------------------------------------------------------------------------------------------------------------------------------------------------------------------------------------------------------------------------------------------------------------------------------------------------------------------------------------------------------------------------------------------------------------------------------------------------------------------------------------------------------------------------------------------------------------------------------------------------------------------------------------------------------------------------------------------------------------------------------------------|----------------------------------------------------------------------------------------------------------------------------------------------------------------------------------------------------------------------------------------------------------------------------------------------------------------------------------------------------------------------------------------------------------------------------------------------------------------------------------------------------------------------------------------------------------------------------------------------------------------------------------------------------------------------------------------------------------------------------------------------------------------------------------------------------------------------------------------------------------|------------------------------------------------------------------------------------------------|-------------------------------------------------------------------------------------------------------------------------------------------------------------------------------------------------------------------------------------------------------------------------------------------------------|--------------------------------------------|----------------------------------------------------------------------------------------------------------------------------------------------------------------------------------------------------------------------------------------------------------------------------------------------------------------------------------------------------------------------------------------------------------------------------------------------------------------------------------------------------------------------------------------------------------------------------------------------------------------------------------------------------------------------------------------------------------------------------------------------------------------------------------------------------------------------------------------------------------------------------------------------------|
| Exercise and Dietary Weight Loss in Overweight and Obese Older Adults with Knee Osteoarthritis<br>Messier et al., (2004) [45] | To determine whether long-term exercise and dietary weight loss are more effective, either separately or in combination, than usual care in improving physical function, pain, and mobility in older overweight and obese adults with knee OA | <p><b>Inclusion</b><br/>Aged <math>\geq 60</math> years<br/>BMI <math>\geq</math> or <math>= 28</math> kg/m<sup>2</sup>.<br/>Knee pain, radiographic evidence of knee OA.<br/>Self-reported physical disability</p> <p><b>Exclusion</b><br/>Serious medical problem.<br/>Mini mental state examination score of <math>&lt; 24.3</math><br/>Inability to finish 18 months study<br/>Inability to walk without assistive device.<br/>Participation in another study<br/>6-Reported alcohol consumption <math>&gt; 14</math> drinks per week<br/>ST segment depression of at least 2mm at an exercise level of 4 METS or less, hypotension, or complex arrhythmia during exercise<br/>Inability to complete the study protocol due to frailty, illness or other reason</p> | <p><b>Participants</b><br/>N=316 community-dwelling obese older adults</p> <p><b>Goal of weight loss</b><br/>5% of the total body weight over 18 months</p> <p><b>Period of intervention</b><br/>18 months</p> <p><b>Setting</b><br/>The Claude D. Pepper Older Americans Independence Centre, Wake Forest University, USA</p> <p><b>Exercise</b><br/>1 hour 3 days/week consisted of an aerobic phase a resistance-training phase, a second aerobic phase, and a cool-down phase</p> <p><b>Dietary intervention</b><br/>Based on principles from the group dynamics literature and social cognitive theory; divided into 3 phases: <b>Intensive</b> (months 1–4), <b>Transition</b> (months 5–6), and <b>maintenance</b> (months 7–18)</p> <p><b>Dietary weight loss plus exercise</b><br/>Combined the exercise and dietary weight loss programmes</p> | Usual care healthy life style (control)<br><br>Exercise group<br><br>Dietary weight loss group | <p><b>Primary outcome</b><br/>Self-reported physical function using the Western Ontario and McMaster Universities Osteoarthritis Index (WOMAC)</p> <p><b>Secondary outcomes</b><br/>Weight loss, 6-minute walk distance, stair-climb time, WOMAC pain and stiffness scores, and joint space width</p> | Data recorded at baseline, 6 and 18 months | <p>Significant body weight loss in diet groups (<math>P &lt; 0.05</math>). Diet plus exercise and diet group lost an average of 5.7% and 4.9% of their body weight respectively with 1.2% for the healthy lifestyle group</p> <p>Significant improvements in self-reported physical function (<math>P &lt; 0.05</math>), 6-minute walk distance (<math>P &lt; 0.05</math>), stair-climb time (<math>P &lt; 0.05</math>), and knee pain (<math>P &lt; 0.05</math>) in the diet plus exercise group compared with the healthy lifestyle group</p> <p>Significant improvement in the 6-minute walk distance in the exercise group (<math>P &lt; 0.05</math>). The diet-only group was not significantly different from the healthy lifestyle group with respect to any of the functional or mobility measures</p> <p>Changes in joint space width were not significantly different between groups</p> |

36  
37  
38  
39  
40  
41  
42  
43  
44  
45  
46  
47  
48  
49

1  
2  
3  
4  
5  
6  
7  
8  
9  
10  
11  
12  
13  
14  
15  
16  
17  
18  
19  
20  
21  
22  
23  
24  
25  
26  
27  
28  
29  
30  
31  
32  
33  
34  
35  
36  
37  
38  
39  
40  
41  
42  
43  
44  
45  
46  
47  
48  
49

| Title/Author/<br>year                                                                                                                                                                                           | Aim                                                                                                                                                                     | Eligibility criteria                                                                                                                                                                                                                                                                                                                                                                                                                                                                                                                                                                                                                                                                                                                                                                                                                                                                                              | Methods                                                                                                                                                                                                                                                                                                                                                                                                                                                                                                                                                                                                                                                                                                                                                                                                                                                                                                                                                                                                                                                                                                                                                                                                                                                                                               | Comparator                                                             | Outcome measures                                                                                                                                                                                                                                 | Assessment points                                              | Result                                                                                                                                                                                                                                                                                                                                                                                                                                                                                                                                                                                                                                                                                                                                                                                                      |
|-----------------------------------------------------------------------------------------------------------------------------------------------------------------------------------------------------------------|-------------------------------------------------------------------------------------------------------------------------------------------------------------------------|-------------------------------------------------------------------------------------------------------------------------------------------------------------------------------------------------------------------------------------------------------------------------------------------------------------------------------------------------------------------------------------------------------------------------------------------------------------------------------------------------------------------------------------------------------------------------------------------------------------------------------------------------------------------------------------------------------------------------------------------------------------------------------------------------------------------------------------------------------------------------------------------------------------------|-------------------------------------------------------------------------------------------------------------------------------------------------------------------------------------------------------------------------------------------------------------------------------------------------------------------------------------------------------------------------------------------------------------------------------------------------------------------------------------------------------------------------------------------------------------------------------------------------------------------------------------------------------------------------------------------------------------------------------------------------------------------------------------------------------------------------------------------------------------------------------------------------------------------------------------------------------------------------------------------------------------------------------------------------------------------------------------------------------------------------------------------------------------------------------------------------------------------------------------------------------------------------------------------------------|------------------------------------------------------------------------|--------------------------------------------------------------------------------------------------------------------------------------------------------------------------------------------------------------------------------------------------|----------------------------------------------------------------|-------------------------------------------------------------------------------------------------------------------------------------------------------------------------------------------------------------------------------------------------------------------------------------------------------------------------------------------------------------------------------------------------------------------------------------------------------------------------------------------------------------------------------------------------------------------------------------------------------------------------------------------------------------------------------------------------------------------------------------------------------------------------------------------------------------|
| Effects of Intensive Diet and Exercise on Knee Joint Loads, Inflammation and Clinical Outcomes Among Overweight and Obese Adults With Knee OA is the IDEA Randomized Clinical Trial<br>Messier et al., 2013 [3] | To determine whether a 10% reduction in body weight induced by diet, with or without exercise, would improve mechanistic and clinical outcomes more than exercise alone | <p><b>Inclusion</b><br/>Aged ≥55 years<br/>Kellgren-Lawrence grade 2 or 3 (mild or moderate) radiographic tibiofemoral OA or tibiofemoral plus patellofemoral OA of one or both knees, pain on most days due to knee OA.<br/>BMI from 27 to 41<br/>Sedentary lifestyle (&lt;30 minutes per week of formal exercise for the past 6months)<br/>Participants usual medications could be maintained or adjusted depending on physician advice</p> <p><b>Exclusion</b><br/>Significant co-morbid disease that would pose a safety threat or impair ability to participate, previous acute knee injury, patellofemoral OA in the absence of tibiofemoral OA<br/>Ability and willingness to modify dietary or exercise behaviours<br/>Excess alcohol use<br/>Inability to finish 18-month study or unlikely to be compliant<br/>Conditions that prohibit knee MRI<br/>Significant cognitive impairment or depression</p> | <p><b>Participants</b><br/>N=454</p> <p><b>Goal of weight loss</b><br/>10-15% of the total body weight</p> <p><b>Period of intervention</b><br/>18 months.</p> <p><b>Setting</b><br/>Wake Forest University and Wake Forest School of Medicine, USA</p> <p><b>Intensive Weight Loss Intervention</b><br/>The diet included up to 2meal-replacement shakes per day. For the third meal, participants followed a weekly menu plan and recipes that were 500 to 750 kcal, low in fat, and high in vegetables. Daily caloric intake was adjusted according to the rate of weight change between intervention visits. The initial diet plan provided an energy-intake deficit of 800 to 1000 kcal.day<sup>-1</sup> as predicted by energy expenditure (estimated resting metabolism ×1.2 activity factor)</p> <p><b>The Exercise Intervention</b><br/>It was conducted for 1 hour on 3 days/week for 18 months. Participation was centre-based for the first 6 months. After 6-month follow-up testing and a 2-week transition phase, participants could remain in the facility programme, opt for a home-based programme, or combine that two. The programme consisted of aerobic walking (15 minutes), strength training (20minutes), a second aerobic phase (15minutes), and cool-down (10 minutes)</p> | <p>Exercise group (control group)</p> <p>Dietary weight loss group</p> | <p><b>Primary outcomes</b><br/>Knee joint compressive force and plasma IL-6 concentration</p> <p><b>Secondary clinical outcomes</b><br/>Self-reported pain (range 0-20), function (range 0-68), mobility, and health-related quality of life</p> | <p>Participants were assessed at baseline, 6 and 18 months</p> | <p>Body weight was reduced significantly in both diet groups (diet and diet plus exercise) more than exercise group (P&lt;0.001)</p> <p>Within group differences:<br/>The diet plus exercise group lost about 10.6kg (11.4%), the diet group lost 8.9kg (9.5%) and 1.8kg (2.0%) of base line body weight</p> <p>No significant difference in walking speed and 6 minute walk test between groups</p> <p>Significant pain reduction was observed in the diet plus exercise group at 18months compared with exercise group (mean score, 1.02; 95% CI, 0.33-1.71; P = .004)</p> <p>The difference in the SF-36 physical subscale was 2.81 units in diet plus exercise relative to exercise group (95% CI, -4.76 to -0.86; P = .005)</p> <p>No significant difference in the mental subscale between groups</p> |

## Methods

In the pilot trial by Messier et al., (2000) participants were randomised into two groups, a combined intervention and control group [44]. The control group received an exercise programme similar to the intervention group [44]. Messier et al., (2004) [45] randomised participants into four groups; combined intervention, exercise, diet and a control group. The control group received health education plus telephone contact to obtain information on pain, medication use, illness, and hospitalisation [45]. Messier et al., (2013) [3] randomised participants into three groups; combined intervention, diet group and exercise group. The exercise alone group was the control. Duration of the trial was six for the pilot trial [44] and eighteen months for ADAPT [45] and IDEA [3].

## Participants

All participants were community dwelling, obese older adults with radiographic evidence of knee OA. A total of 794 participants aged 55 years or older were randomised into the included studies. One hundred and fifty five participants were included in the meta-analysis.

## Interventions

The pilot trial [44] and two definitive trials [3, 45] were conducted by the same group from Wake Forest University, Winston-Salem, NC, USA. The goal of weight loss varied from 6.8kg over 6 months to 10-15% of total body weight over eighteen months of intervention. Outcomes were recorded at 3 time-points for the pilot trial (baseline, 3 months and 6 months) and for the two definitive trials (baseline, 6 months and eighteen months). Exercise duration and frequency were similar in all included trials (1 hour/ 3 times per week). Exercise types were aerobic exercise and resistance training. Principles from group dynamics and social-cognitive theory were used for behavioural treatment in the diet group in IDEA [3]. The diet sessions were graded from intensive (facilitating behavioural changes by using self-regulatory skills) to transition stage (assisting participants who not reached their weight loss goals in establishing new goals) and maintenance stage (assisting patients who had reached their weight loss goals to maintenance their weight loss). For the intensive weight loss trial the daily caloric intake was adjusted according to the rate of weight change between intervention visits (low fat and high vegetable diet). The initial diet plan provided an energy-intake deficit of 800 to 1000 Kcal.day<sup>-1</sup>, as predicted by an energy expenditure (estimated resting metabolism × 1.2 activity factor), of at least 1200kcal for men and 1100 for women [3].

## Outcome measures

Due to few eligible studies, analysis was based upon all of the outcomes of interest (body weight and BMI as well as musculoskeletal function), irrespective of whether they were specified as the primary a secondary outcome in the included trials (see below):

Messier et al., (2000): No primary or secondary outcomes were specified [44].

Messier et al., (2004): The ADAPT primary outcome was self-reported physical function measured using the Western Ontario and McMaster Universities Osteoarthritis Index (WOMAC) Secondary outcomes included weight loss, 6-minute walk distance, stair-climb time, WOMAC pain and stiffness scores, and joint space width [45].

Messier et al., (2013): In the IDEA trial the primary outcomes were knee joint compressive force and plasma IL-6 concentration. Secondary outcome measures included WOMAC pain,

WOMAC function, gait speed, 6 minute walk test, QOL, body weight, height, BMI and body composition [3].

### Risk of bias within trials

Substantial inter-reviewer agreement was achieved on the risk of bias assessment ( $k= 0.73$ ) [32]. All of the included trials were evaluated as unclear risk of bias [34]. Most of the key domains were assessed as unclear risk of bias within each trial (Table 3).

**Table 3: Summary assessment of the overall risk of bias for each trial**

| Study<br>(Author,<br>year) | Component of risk of bias |   |   |   |   |   | Summary<br>risk of<br>bias |
|----------------------------|---------------------------|---|---|---|---|---|----------------------------|
|                            | 1                         | 2 | 3 | 4 | 5 | 6 |                            |
| Messier et al.,<br>2000    | U                         | U | U | U | L | U | Unclear (5)<br>Low (1)     |
| Rejeski et al.,<br>2002    | U                         | U | U | L | L | U | Unclear (4)<br>Low (2)     |
| Messier et al.,<br>2004    | L                         | U | U | L | L | U | Unclear (3)<br>Low (3)     |
| Focht et al., 2005         | U                         | U | U | L | L | U | Unclear (4)<br>Low (2)     |
| Messier et al.,<br>2013    | L                         | U | U | L | L | U | Unclear (3)<br>Low (3)     |

### Risk of bias across trials

Risk of bias across trials was evaluated as unclear [34] only component 5 (selective outcome reporting) was evaluated as low risk of bias for all studies. For the ‘blinding of participants, personnel and outcome assessor’ component, all trials were evaluated as having unclear risk of bias as no strategies were reported to address the issue of outcome assessor unblinding. Also, for the ‘other sources of bias’ components, all trials were evaluated with unclear risk of bias due to unclear reporting.

### Results of individual trials and synthesis of results

#### Quantitative synthesis

Meta-analysis was possible for only one outcome measure at one assessment time-point. Meta-analysis was used to assess the effect of the combined intervention programme compared with exercise on the 6 minute walk test (metres) after 6 months of intervention. Only two trials [3, 44] with unclear risk of bias with  $n=155$  participants were available for meta-analysis. The pooled random effects (15.05, 95% CI -11.77 to 41.87) did not support a combined intervention effect (Figure 2).

#### Synthesis of results

##### Modified narrative synthesis

With respect to the guidelines for a narrative synthesis, only two elements were possible to apply; developing a preliminary synthesis and exploring the relationships within and between studies [39, 40].

### Developing a preliminary synthesis

Tabulation was used to present primary and secondary outcome measures that were not included in the meta-analysis; body weight, knee ROM, physical function, mobility, pain and QOL. Studies including a comparison of the combined intervention programme with an exercise intervention are presented in Tables 4-5.

**Table 4: Preliminary synthesis for the primary outcome measures at baseline and after intervention; body weight, knee ROM, physical function and mobility comparing the combined intervention programme with an exercise intervention**

| Category          | Outcome measure                         | Assessment point | Study                | Intervention group |     |              |     | Control group |     |              |     |
|-------------------|-----------------------------------------|------------------|----------------------|--------------------|-----|--------------|-----|---------------|-----|--------------|-----|
|                   |                                         |                  |                      | M0 (SD0)           | N0  | M1 (SD1)     | N1  | M0 (SD0)      | N0  | M1 (SD1)     | N1  |
| Body weight       | Body weight (kg)                        | 6 months         | Messier et al., 2000 | 91 (13)            | 13  | 82.5 (4)     | 12  | 109 (17)      | 11  | 107.2 (15)   | 9   |
|                   |                                         | 6 months         | Messier et al., 2013 | 93 (14.7)          | 152 | 84.3 (14.7)  | 133 | 92.3 (14.6)   | 150 | 92.4 (15.4)  | 122 |
|                   |                                         | 18 months        | Messier et al., 2013 | 93 (14.7)          | 152 | 82.4 (15.2)  | 121 | 92.3 (14.6)   | 150 | 90.5 (15)    | 115 |
| Knee ROM          | ROM                                     | 6 months         | Messier et al., 2000 | 55.27* (N/A)       | 13  | 56.47 (0.91) | 12  | 55.27* (N/A)  | 11  | 56.73 (1.02) | 9   |
|                   | Estimated Concentric extension (Degree) | 6 months         | Messier et al., 2000 | 30.7 (N/A)         | 13  | 31 (N/A)     | 12  | 30.7 (N/A)    | 11  | 33.4 (N/A)   | 9   |
|                   | Estimated Concentric flexion            | 6 months         | Messier et al., 2000 | 18.2 (N/A)         | 13  | 18.5 (N/A)   | 12  | 18.2 (N/A)    | 11  | 20.8 (N/A)   | 9   |
| Physical function | Physical function (WOMAC)               | 18 months        | Messier et al., 2013 | 24.6 (11.7)        | 152 | 14.2 (10.4)  | 121 | 23.1 (10.3)   | 150 | 17.6 (9.8)   | 115 |
| Mobility          | 6 min walk test (meters)                | 18 months        | Messier et al., 2013 | 467 (87.9)         | 152 | 537 (92.6)   | 121 | 480 (90.3)    | 150 | 525 (79.2)   | 115 |
|                   | Stair climb (seconds)                   | 6 months         | Messier et al., 2000 | 9.81*              | 13  | 7.4 (0.32)   | 12  | 9.81*         | 11  | 8.7 (0.36)   | 9   |

Abbreviations: M0 (SD0)= Mean and standard deviation at baseline, N0= Participants number at baseline, M1 (SD1)= Mean and standard deviation after intervention, N1= Participants number after intervention, N/A= Data not available.

**Table 5: Preliminary synthesis for the secondary outcome measures at baseline and after intervention; body weight, pain and QOL comparing the combined intervention programme with an exercise intervention**

| Category | Outcome measure          | Assessment point | Study                | Intervention group |     |            |     | Control group |     |            |     |
|----------|--------------------------|------------------|----------------------|--------------------|-----|------------|-----|---------------|-----|------------|-----|
|          |                          |                  |                      | M0 (SD0)           | N0  | M1 (SD1)   | N1  | M0 (SD0)      | N0  | M1 (SD1)   | N1  |
| Pain     | WOMAC pain               | 6 months         | Messier et al., 2013 | 6.7 (3.4)          | 152 | 4.6 (2.9)  | 133 | 6.1 (2.9)     | 150 | 4.5 (3)    | 122 |
|          | WOMAC pain               | 18 months        | Messier et al., 2013 | 6.7 (3.4)          | 152 | 3.7 (3.1)  | 121 | 6.1 (2.9)     | 150 | 4.4 (2.7)  | 115 |
| QOL      | SF-36 Physical component | 6 months         | Messier et al., 2013 | 36.6 (9.41)        | 152 | 43.5 (9)   | 133 | 36.8 (9)      | 150 | 41.5 (9)   | 122 |
|          | SF-36 Mental component   | 6 months         | Messier et al., 2013 | 57.2 (6.6)         | 152 | 56.9 (7.3) | 133 | 56.5 (8.4)    | 150 | 56.1 (7.6) | 122 |
|          | SF-36 Physical component | 18 months        | Messier et al., 2013 | 36.6 (9.41)        | 152 | 44.7 (8.7) | 121 | 36.8 (9)      | 150 | 42.0 (9)   | 115 |
|          | SF-36 Mental component   | 18 months        | Messier et al., 2013 | 57.2 (6.6)         | 152 | 56.1 (6.5) | 121 | 56.5 (8.4)    | 150 | 55.4 (7.6) | 115 |

Abbreviations: M0 (SD0)= Mean and standard deviation at baseline, N0= Participants number at baseline, M1 (SD1)= Mean and standard deviation after intervention, N1= Participants number after intervention, N/A= Data not available.

Tabulation was used to compare the effect of the combined intervention programme compared with usual care (healthy life style) on primary and secondary outcome measures; body weight, physical function, mobility, pain and QOL (Tables 6-7).

**Table 6: Preliminary synthesis for the primary outcome measures at baseline and after intervention; physical function and mobility comparing the combined intervention programme with usual care**

| Category          | Outcome measure           | Assessment point | Study                | Intervention group |     |              |     | Control group |     |               |     |
|-------------------|---------------------------|------------------|----------------------|--------------------|-----|--------------|-----|---------------|-----|---------------|-----|
|                   |                           |                  |                      | M0 (SD0)           | N0  | M1 (SD1)     | N1  | M0 (SD0)      | N0  | M1 (SD1)      | N1  |
| Body weight       | Body weight (kg)          | 18 months        | Messier et al., 2004 | 92 (1.7)           | 76  | 86.8 (N/A)   | 58  | 96 (1.8)      | 78  | 94.9 (N/A)    | 67  |
| Physical function | Physical function (WOMAC) | 6 months         | Messier et al., 2004 | 23.6 (12.2)        | 76  | 17.9* (N/A)  | 63  | 26 (11.4)     | 78  | 22.4* (N/A)   | 70  |
|                   | Physical function (WOMAC) | 18 months        | Messier et al., 2004 | 23.6 (12.2)        | 76  | 29.3* (N/A)  | 58  | 26 (11.4)     | 78  | 29.4 (N/A)    | 67  |
| Mobility          | 6 min walk test (meters)  | 6 months         | Messier et al., 2004 | 416.2 (98.7)       | 76  | 482.3 (100)  | 63  | 434.6 (96.4)  | 78  | 429 (108)     | 70  |
|                   | 6 min walk test (meters)  | 18 months        | Messier et al., 2004 | 416.2 (98.7)       | 76  | 477.8 (99.7) | 58  | 434.6 (96.4)  | 78  | 429.9 (104.7) | 67  |
|                   | 6 min walk test (meters)  | 18 months        | Focht et al., 2005   | 414.5 (85.3)       | N/A | 465 (96.3)   | N/A | 433.4 (81.9)  | N/A | 430 (79.5)    | N/A |
|                   | Stair climb (seconds)     | 6 months         | Messier et al., 2004 | 10.9 (5.8)         | 76  | 8.8 (6.2)    | 63  | 9.5 (5.6)     | 78  | 9.9 (6.3)     | 70  |
|                   | Stair climb (seconds)     | 18 months        | Focht et al., 2005   | 10.4 (7.3)         | N/A | 8.9 (5.4)    | NA  | 9.4 (4.9)     | N/A | 9.9 (5.6)     | N/A |

\*Estimated value from Figure 2 in Messier et al., 2004.

Abbreviations: M0 (SD0)= Mean and standard deviation at baseline, N0= Participants number at baseline, M1 (SD1)= Mean and standard deviation after intervention, N1= Participants number after intervention, N/A= Data not available.

**Table 7: Preliminary synthesis for the secondary outcome measures at baseline and after intervention; body weight, pain and QOL comparing the combined intervention programme with usual care**

| Category | Outcome measure          | Assessment point           | Study                | Intervention group |    |              |     | Control group |    |              |     |
|----------|--------------------------|----------------------------|----------------------|--------------------|----|--------------|-----|---------------|----|--------------|-----|
|          |                          |                            |                      | M0 (SD0)           | N0 | M1 (SD1)     | N1  | M0 (SD0)      | N0 | M1 (SD1)     | N1  |
| Pain     | Pain scale (WOMAC)       | 6 months                   | Messier et al., 2004 | 7.3 (3.6)          | 76 | 5.5 (3.7)    | 63  | 7.3 (3.4)     | 78 | 6.2 (3.9)    | 70  |
|          | Pain scale (WOMAC)       | 18 months                  | Messier et al., 2004 | 7.3 (3.6)          | 76 | 5.1 (3.6)    | 58  | 7.3 (3.4)     | 78 | 6 (3.7)      | 67  |
| QOL      | SF-36 Physical component | Average of 6 and 18 months | Rejeski et al. 2002  | 35.39 (10.5)       | 68 | 40.57 (N/A)* | N/A | 33.60 (8.4)   | 68 | 34.41 (N/A)* | N/A |
|          | SF-36 Mental component   | Average of 6 and 18 months | Rejeski et al. 2002  | 52.85 (10.7)       | 68 | 53.31 (N/A)* | N/A | 52.70 (10.9)  | 68 | 53.51 (N/A)* | N/A |

Abbreviations: M0 (SD0)= Mean and standard deviation at baseline, N0= Participants number at baseline, M1 (SD1)= Mean and standard deviation after intervention, N1= Participants number after intervention, N/A= Data not available, \*= only SEM data available; SD1 data could not be calculated due to missing N1 value.



### *Exploring the relationships within and between studies*

Characteristics of the trials are presented in Table 2. All included trials were conducted by the same research group. The eligibility criteria were very similar across studies. The exercise intervention included strengthening and aerobic exercise. The intervention frequency (1 hour/3 times per week) was the same across the included trials. Further details about the design of the trials are presented above.

Tables 4 & 6 show differences between the intervention group and the control group (despite the comparator) with respect to body weight and the 6 minute walk distance. These differences were consistent with the results from the included trials. The diet plus exercise group in the pilot study [44] lost weight compared with the control group ( $p=0.01$ ) after 6 months of intervention [44] and this was also the case with respect to the longer duration intervention trial (18 months) in which the intervention group lost significantly ( $p<0.001$ ) more weight than the exercise group [3]. However, in ADAPT [45] both groups (intervention and healthy lifestyle) lost weight ( $p<0.05$ ) after 18 months of intervention [45] although there was a significant difference in the 6 minute walk result in favour of the diet plus exercise group ( $p<0.05$ ) [45]. Also, there was a significant difference ( $p=0.005$ ) in the 6 minute walk between the intervention and exercise groups in the IDEA trial [3].

### **Additional analysis**

No further analyses were possible owing to the lack of reported information and low number of included trials.

### **Grading the quality of evidence**

A summary assessment was undertaken to draw conclusions about the overall quality of evidence for the combined intervention on mobility using GRADE software [43]. Both trials included in the meta-analysis [3, 44] were evaluated as 'high' quality evidence before being downgraded as they were RCTs, before being modified according to five negative and two positive factors [41, 42]. The quality of evidence for a combined intervention programme of physical activity and diet on walking distance (metres) within 6 minutes after a period of 6 months of intervention was evaluated as moderate (Table 8).

**Table 8: Factors determining the quality of evidence according to GRADE**

| Factor           | Judgment    | Explanation                                                                                                                                                                                                                                                                                                                                                                                                                                                                                                                                                                                                         |
|------------------|-------------|---------------------------------------------------------------------------------------------------------------------------------------------------------------------------------------------------------------------------------------------------------------------------------------------------------------------------------------------------------------------------------------------------------------------------------------------------------------------------------------------------------------------------------------------------------------------------------------------------------------------|
| 1. Risk of bias  | Not serious | <ul style="list-style-type: none"> <li>➤ Only two studies included in meta-analysis and both of them evaluated as unclear risk of bias.</li> <li>➤ No serious limitations to downgrade the quality of evidence.</li> <li>➤ Sequence generation was not reported in 1 study; allocation concealment not specified in both studies; no strategy reported to address issue of outcome assessor unblinding.</li> <li>➤ Incomplete outcome data evaluated as 'unclear' in the pilot study; no mention of missing data or methods used to address missing data; no primary outcome stated for the pilot study.</li> </ul> |
| 2. Inconsistency | Not serious | <ul style="list-style-type: none"> <li>➤ <math>I^2= 50\%</math>, which may be evaluated as either low or substantial heterogeneity; this overlap affects the decision making.</li> <li>➤ Magnitude of heterogeneity could be the result of high variability in the sample size and effect size which justifies the decision.</li> </ul>                                                                                                                                                                                                                                                                             |
| 3. Indirectness  | Not serious | <ul style="list-style-type: none"> <li>➤ Direct applicability of the included studies aims and objectives to their target populations, interventions and outcomes of interest.</li> </ul>                                                                                                                                                                                                                                                                                                                                                                                                                           |

|                     |            |                                                                                                                                                                                                                                                                                                                                                       |
|---------------------|------------|-------------------------------------------------------------------------------------------------------------------------------------------------------------------------------------------------------------------------------------------------------------------------------------------------------------------------------------------------------|
| 4. Imprecision      | Serious    | <ul style="list-style-type: none"> <li>➤ Boundaries of CI crossing the no effect line which downgrades the quality of evidence by one level.</li> <li>➤ Number of participants needed for a single powered trial is higher than number of participants estimated from the meta-analysis; quality of evidence not downgraded on this basis.</li> </ul> |
| 5. Publication bias | Undetected | <ul style="list-style-type: none"> <li>➤ Selective outcome reporting domain evaluated low in both studies; publication bias considered as not serious by two reviewers.</li> </ul>                                                                                                                                                                    |

## DISCUSSION

### Summary of evidence

This is the first systematic review and mixed methods analysis investigating the effectiveness of combining dietary restriction and physical activity interventions for musculoskeletal function in older overweight/ obese elders with knee OA. One pilot trial [44] and two definitive trials [3, 45] (794 participants) conducted by the same research group (Wake Forest University, Winston-Salem, NC, USA) were included. The intervention programme was compared with exercise training in one definitive trial (IDEA) [3] and the pilot trial [44], while usual care was the comparator in the ADAPT [45]. Two additional articles [46, 47] which reported further outcomes of the ADAPT were identified [45].

Data syntheses of this review were conducted using both meta-analysis and modified narrative synthesis. Although visual inspection of the tables of results indicated that the combined programme enhanced body weight reduction, and improved mobility, there was moderate evidence for no effect. Changes of BMI scores were not reported in the included studies. Meta-analysis was possible for only the 6 minute walk test at 6 months and was not possible for the other outcome measures due to the inconsistency of assessment points or the comparator. The pooled random effect of two trials [3, 44] with 155 participants did not support the combined intervention program (15.05, 95% CI -11.77 to 41.87) (albeit with a total effect of 15 m deemed not clinically significant according to previous literature) [49, 50]. Although the meta-analyses showed substantial heterogeneity  $I^2=50%$ , this was classified as not serious using the GRADE evaluation tool [41, 42] as it was assessed as likely to be due to high variability in both the sample size and effect size. Clinical heterogeneity across trials was limited to comparator and duration. Overall the quality of evidence was downgraded to moderate due to imprecision of the results according to GRADE [43]. All included trials were reported as having an unclear risk of bias which was mainly due to unclear reporting of some information [34]. For instance, both the 'blinding of participants, personnel and outcome assessor' and the 'other sources of bias' component were evaluated as unclear for all trials.

Results from the trial by Messier et al., [44] indicated no statistically significant differences across groups with regard to self-reported performance measures of physical function, knee pain scores, knee strength and biomechanical measures (synovial fluid, keratan sulphate and level of IL-1) after 6 months of intervention. Findings from Messier et al., [45] indicated a statistically significant benefit of the combined intervention in terms of self-reported physical function, 6 minute walk test, stair climb and knee pain. The findings from Messier et al., [3] indicated a significant improvement in the 6 minute walk test and walking speed in the intervention group. Moreover, there was a significant reduction ( $p<0.05$ ) of body weight among the intervention groups in all trials. In the current review the finding of no effect of a combined intervention programme may be due to the very low number of included trials (and participants) but probably is not due to low compliance. Compliance of the diet and exercise group to the exercise programme at 6 months was higher in the pilot study [44] compared

1  
2  
3 with the IDEA trial [3]. In the pilot study [44] compliance (ratio of the number of exercise  
4 sessions attended to the total number of the exercise sessions prescribed with the exercise  
5 programme) was 82.6% for the exercise group and 94.7% for diet plus exercise group. For  
6 the IDEA trial [3], 399/ 454 participants (88%) completed the study; compliance of the diet  
7 and exercise group was 70% at 6 months and 58% at 18 months with no adverse events and  
8 no significant differences between groups.  
9

10 In addition to diet and exercise two current trials MEDIC1 [28] and MEDIC2 [27] have  
11 reported that a multimodal approach of education, neuromuscular exercise, insoles and, if  
12 indicated, a dietary weight loss programme and pain medication are effective for adults and  
13 older adults with moderate to severe knee OA. These studies were not included in this review  
14 due to the wide age range across participants. MEDIC 1 [28] included 9 participants and  
15 MEDIC2 [27] included 12 participants below the age of 55 years and there was no sub-group  
16 analysis of older participants. In MEDIC1 [28] the participants were eligible for total knee  
17 replacement (TKR) and were randomised to nonsurgical and surgical treatment followed by  
18 the intervention programme. Both interventions showed substantial improvement but the  
19 surgical treatment resulted in greater pain relief and functional improvement after 12 months  
20 compared with nonsurgical treatment alone. However, only 26% of the patients who were  
21 assigned to receive nonsurgical treatment alone underwent TKR in the following year [28]. In  
22 MEDIC2 [27] participants had radiographic confirmation of OA (Kellgren-Lawrence grade  
23  $\geq 1$ ), but were not eligible for a TKR. The 12-week non-surgical treatment programme  
24 consisted of individualised progressed neuromuscular exercise, patient education, insoles,  
25 dietary advice and prescription of pain medication if indicated, while usual care comprised  
26 two leaflets with information and advice on knee OA and recommended treatments. This  
27 nonsurgical treatment programme was found to be more effective with respect to pain,  
28 activities of daily living and QOL at 12 months compared with usual care, although it was not  
29 possible to determine which of the components within this multi-intervention programme  
30 were most effective and whether the intervention as a whole would be equally effective in  
31 older OA patients [27].  
32  
33  
34

35 The main limitation of this review is that only few eligible studies were identified. Thus, the  
36 optimal components of dietary and exercise interventions in terms of type, duration and  
37 quantity suitable for this population are still unclear. Future studies are required in this field  
38 to optimise outcome measures and methods of delivering a programme at an acceptable cost,  
39 prior to a future adequately powered definitive trial.  
40  
41

### 42 **Conclusion**

43 Based on current evidence synthesised in this review, it is hard to judge the effectiveness of a  
44 combined programme of diet and physical activity due to the low number of included trials  
45 and participants and the quality of available evidence. Only moderate quality evidence was  
46 available to investigate the intervention programmes. However, the narrative synthesis  
47 suggests that interventions with a focus on reduction of body weight and/or improved  
48 mobility are worthy of further evaluation. Further adequately powered RCTs testing the  
49 effects of a combined intervention against each component individually are required to  
50 optimise diet and exercise interventions using a multimodal approach.  
51  
52

### 53 **Acknowledgement**

54 The authors would like to thank Lynn Harris, Library Services, University of Birmingham for  
55 her contribution to the development of the search strategies.  
56  
57  
58  
59  
60

### Contributorship statement

ASA led the review and contributed to all stages, including development of the search strategy, running the searches, assessing trials eligibility, data extraction and synthesis (including risk of bias and GRADE analysis), and preparation of the manuscript. CAG and ABR provided expertise in systematic review methodology and risk of bias analysis. AMK assisted with assessment of eligibility of included studies and data extraction. All authors read and provided feedback on the preparation of this manuscript according to a PRISMA 2009 checklist and approved the final manuscript.

### Competing interests

There are no competing interests.

### Funding

This review is a part of a PhD programme undertaken by ASA, and is fully funded by the King Saud University, Kingdom of Saudi Arabia, Riyadh and the Saudi Arabian Cultural Bureau, United Kingdom, London.

### Data sharing statement

There are no additional unpublished data from the review.

Figure 1: Study selection flow diagram [48].

Figure 2: 6 minute walk test (metres) at 6 months.

## REFERENCES

1. Imamura M, Imamura ST, Kaziyama HH, et al. Impact of nervous system hyperalgesia on pain, disability, and quality of life in patients with knee osteoarthritis: a controlled analysis. *Arthritis Care Res* 2008;59(10):1424-1431.
2. Arthritis Foundation (2015) what is arthritis [online]. Available from: <http://www.arthritis.org/about-arthritis/understanding-arthritis/> [Accessed July 2016]
3. Messier SP, Mihalko SL, Legault C, et al. Effects of intensive diet and exercise on knee joint loads, inflammation, and clinical outcomes among overweight and obese adults with knee osteoarthritis: the IDEA randomized clinical trial. *JAMA* 2013;310(12):1263-1273.
4. Pouli N, Nair RD, Lincoln NB, et al. The experience of living with knee osteoarthritis: exploring illness and treatment beliefs through thematic analysis. *Disabil Rehabil* 2013;36 (7):600-607.
5. Heidari B. Knee osteoarthritis prevalence, risk factors, pathogenesis and features: Part I. *Caspian J Intern Med* 2011;2(2):205.
6. Vos T, Flaxman AD, Naghavi M, et al. Years lived with disability (YLDs) for 1160 sequelae of 289 diseases and injuries 1990–2010: a systematic analysis for the Global Burden of Disease Study 2010. *The Lancet* 2013 Jan 4;380(9859):2163-96.
7. Hammerich AS, Anemaet WK. Applying the Evidence for Exercise Prescription in Older Adults with Knee Osteoarthritis. *Curr Geriatr Rep* 2016 Sep 1;5(3):179-90.
8. Arthritis Research UK (2013) Osteoarthritis in General Practice, Data and Perspectives [online]. Available from: <http://www.arthritisresearchuk.org/policy-and-public-affairs/reports-and-resources/reports.aspx> [Accessed July 2016]

9. Felson DT, Lawrence RC, Hochberg MC, et al. Osteoarthritis: new insights. Part 2: treatment approaches. *Ann Intern Med* 2000;133:726–37.
10. Bhatia D, Bejarano T, & Novo M. Current interventions in the management of knee osteoarthritis. *J. Pharm. Bioall. Sci.* 2013;5(1):30.
11. Abbott JH, Robertson MC, Chapple C, et al. Manual therapy, exercise therapy, or both, in addition to usual care, for osteoarthritis of the hip or knee: a randomized controlled trial. 1: clinical effectiveness. *Osteoarthritis Cartilage* 2013;21(4):525-534.
12. DeJaco C, Singh YP, Perel P, et al. 2015 Recommendations for the management of polymyalgia rheumatica: a European League Against Rheumatism/American College of Rheumatology collaborative initiative. *Arthritis Rheumatol* 2015;67(10): 2569-2580.
13. Fernandes L, Hagen KB, Bijlsma JW, et al. EULAR recommendations for the non-pharmacological core management of hip and knee osteoarthritis. *Ann. Rheum. Dis* 2013;72(7):1125-1135.
14. McAlindon TE, Bannuru R, Sullivan MC, et al. OARSI guidelines for the non-surgical management of knee osteoarthritis. *Osteoarthritis Cartilage* 2014;22(3):363-388.
15. Ryan P. & Sawin K.J. The Individual and Family Self-Management Theory: background and perspectives on context, process and outcomes. *Nurs Outlook* 2009; 57, 217–225. doi:10.1016/j.outlook.2008.10.004.
16. Kao MH, Tsai YF, Chang TK, et al. The effects of self management intervention among middle age adults with knee osteoarthritis. *J Adv Nurs* 2016;72(8), 1825-1837.
17. Yusuf E. Pharmacologic and Non-Pharmacologic Treatment of Osteoarthritis. *Curr Treatm Opt Rheumatol* 2016; 1;2(2):111-25.
18. Coggon DI, Reading I, Croft P, et al. Knee osteoarthritis and obesity. *International journal of obesity and related metabolic disorders: journal of the International Association for the Study of Obesity* 2001;25(5):622-627.
19. Huang MH, Chen CH, Chen TW, et al. The effects of weight reduction on the rehabilitation of patients with knee osteoarthritis and obesity. *Arthritis Care Res* 2000;13(6):398-405.
20. Christensen R, Bartels EM, Astrup A, et al. Effect of weight reduction in obese patients diagnosed with knee osteoarthritis: a systematic review and meta-analysis. *Ann Rheum Dis* 2007;66(4):433-439.
21. Messier SP. Diet and exercise for obese adults with knee osteoarthritis. *Clin. Geriatr. Med.* 2010;26(3):461-477.
22. Roddy E, Zhang W, & Doherty M. Aerobic walking or strengthening exercise for osteoarthritis of the knee? A systematic review. *Ann Rheum Dis* 2005;64(4):544-548.
23. Patrick DL, Ramsey SD, Spencer AC, et al. Economic evaluation of aquatic exercise for persons with osteoarthritis. *Med care* 2001;39(5):413-424.
24. Minor MA, Webel RR, Kay DR, et al. Efficacy of physical conditioning exercise in patients with rheumatoid arthritis and osteoarthritis. *Arthritis Rheum* 1989; 32(11):1396-1405.
25. Marks R. Knee Osteoarthritis, Obesity and Exercise Therapy-A Complex Issue. *J Obes Eat Disord.* 2016;2(2).

- 1  
2  
3 26. Ekram AS, Cicuttini FM, Teichtahl AJ, et al. Weight satisfaction, management  
4 strategies and health beliefs in knee osteoarthritis patients attending an outpatient  
5 clinic. *Intern. Med.* 2016 Apr 1;46(4):435-42.  
6  
7 27. Skou ST, Rasmussen S, Laursen MB, et al. The efficacy of 12 weeks non-surgical  
8 treatment for patients not eligible for total knee replacement: a randomized controlled  
9 trial with 1-year follow-up. *Osteoarthritis Cartilage* 2015;23(9):1465-1475.  
10  
11 28. Skou ST, Roos EM, Laursen MB, et al. A randomized, controlled trial of total knee  
12 replacement. *N. Engl. J. Med.* 2015;373(17):1597-1606.  
13  
14 29. Moher D, Liberati A, Tetzlaff J, et al. Preferred reporting items for systematic reviews  
15 and meta-analyses: the PRISMA statement. *Ann. Intern. Med.* 2009;151(4):264-269.  
16  
17 30. Higgins JPT, Green S, eds. Cochrane Handbook for Systematic Reviews of  
18 Interventions Version 5.1.0. The Cochrane Collaboration 2011. Available  
19 from: <http://www.cochrane-handbook.org/> [Accessed July 2016].  
20  
21 31. Brandt KD, Fife RS, Braunstein EM, et al. Radiographic grading of the severity of  
22 knee osteoarthritis: relation of the Kellgren and Lawrence grade to a grade based on  
23 joint space narrowing, and correlation with arthroscopic evidence of articular cartilage  
24 degeneration. *Arthritis Rheum* 1991;34(11):1381-1386.  
25  
26 32. Hsu LM, & Field R. Interrater agreement measures: Comments on Kappan, Cohen's  
27 Kappa, Scott's  $\pi$ , and Aickin's  $\alpha$ . *Understand Stat* 2003;2(3):205-219.  
28  
29 33. Consumers and Communication Group resources for authors; Data Extraction  
30 Template (word format). Available from: [http://cccr.org.cochrane.org/author-resources](http://cccr.org/cochrane.org/author-resources).  
31 [Accessed July 2016].  
32  
33 34. Higgins JP, Altman DG, Gøtzsche PC, et al. The Cochrane Collaboration's tool for  
34 assessing risk of bias in randomised trials. *BMJ* 2011;343:d5928.  
35  
36 35. Green S, Higgins JP, eds. Chapter 2: Preparing a cochrane review. In: Higgins JP,  
37 Green S, eds. Cochrane Handbook for Systematic Reviews of Interventions Version  
38 5.1.0. Available from:  
39 [http://handbook.cochrane.org/chapter\\_2/2\\_preparing\\_a\\_cochrane\\_review.htm](http://handbook.cochrane.org/chapter_2/2_preparing_a_cochrane_review.htm)  
40 [Accessed July 2016].  
41  
42 36. DerSimonian R, Laird N. Meta-analyses in clinical trials. *Control Clin Trials* 1986;  
43 7:177e88.  
44  
45 37. Centre for Reviews and Dissemination [CRD]. Systematic Reviews: CRD's Guidance  
46 for Undertaking Reviews in Healthcare. 3rd edn. CRD University of York, York  
47 Publishing Services Ltd, York, 2009. Available from:  
48 [https://www.york.ac.uk/media/crd/Systematic\\_Reviews.pdf](https://www.york.ac.uk/media/crd/Systematic_Reviews.pdf). [Accessed July 2016].  
49  
50 38. Deeks JJ, Higgins JP, Altman DG, eds. Chapter 9: Analyzing data and undertaking  
51 meta-analyses. In: Higgins JP, Green S, eds. Cochrane Handbook for Systematic  
52 Reviews of Interventions Version 5.1.0. Available from:  
53 [http://handbook.cochrane.org/chapter\\_9/9\\_8\\_chapter\\_information.htm](http://handbook.cochrane.org/chapter_9/9_8_chapter_information.htm).  
54 [Accessed July 2016].  
55  
56 39. Rodgers M, Arai L, Britten N, et al. Guidance on the conduct of narrative synthesis in  
57 systematic reviews: a comparison of guidance-led narrative synthesis versus meta-  
58 analysis. In *14th Cochrane Colloquium* 2006: 23-26.  
59  
60

- 1  
2  
3 40. Popay J, Roberts H, Sowden A, et al. Guidance on the conduct of narrative synthesis in  
4 systematic reviews. *ESRC methods programme* 2006;15(1):047-71.  
5  
6 41. Guyatt GH, Oxman AD, Kunz R, et al. GRADE guidelines 6. Rating the quality of  
7 evidence—imprecision. *J. clin. Epidemiol.* 2011;64(12):1283-1293.  
8  
9 42. Schünemann H, Brozek J, & Oxman A. GRADE handbook for grading quality of  
10 evidence and strength of recommendation. The GRADE Working Group 2009.  
11 Available from:<http://gdt.guidelinedevelopment.org/app/handbook/handbook.html>.  
12 [Acceded July 2016].  
13  
14 43. Grading quality of evidence and strength of recommendations. [www.grade.pro](http://www.grade.pro)  
15 [Accessed July 2016].  
16  
17 44. Messier SP, Loeser RF, Mitchell MN, et al. Exercise and weight loss in obese older  
18 adults with knee osteoarthritis: a preliminary study. *J Am Geriatr Soc*  
19 2000;48(9):1062-1072.  
20  
21 45. Messier S, Loeser RF, Miller GD, et al. Exercise and dietary weight loss in overweight  
22 and obese older adults with knee osteoarthritis: the Arthritis, Diet, and Activity  
23 Promotion Trial. *Arthritis Rheum* 2004;50(5):1501-1510.  
24  
25 46. Rejeski WJ, Focht BC, Messier SP, et al. Obese, older adults with knee osteoarthritis:  
26 weight loss, exercise, and quality of life. *Health Psychol* 2002;21(5):419.  
27  
28 47. Focht BC, Rejeski WJ, Ambrosius WT, et al. Exercise, self-efficacy, and mobility  
29 performance in overweight and obese older adults with knee osteoarthritis. *Arthrit*  
30 *Care Res* 2005;53(5):659-665.  
31  
32 48. Stovold E, Beecher D, Foxlee R, et al. Study flow diagrams in Cochrane systematic  
33 review updates: an adapted PRISMA flow diagram. *Syst. Rev.* 2014; 3(1), 54.  
34  
35 49. Gremeaux V, Troisgros O, Benaïm S, et al. Determining the minimal clinically  
36 important difference for the six-minute walk test and the 200-meter fast-walk test  
37 during cardiac rehabilitation program in coronary artery disease patients after acute  
38 coronary syndrome. *Arch. Phys. Med. Rehabil.* 2011; 92(4), 611-619.  
39  
40 50. Perera S, Mody SH, Woodman RC, et al. Meaningful change and responsiveness in  
41 common physical performance measures in older adults. *J Am Geriatr Soc* 2006;  
42 54(5), 743-749.  
43  
44  
45  
46  
47  
48  
49  
50  
51  
52  
53  
54  
55  
56  
57  
58  
59  
60



Figure1: Study selection flow diagram [48].



1  
2  
3  
4  
5  
6  
7  
8  
9  
10  
11  
12  
13  
14  
15  
16  
17  
18  
19  
20  
21  
22  
23  
24  
25  
26  
27  
28  
29  
30  
31  
32  
33  
34  
35  
36  
37  
38  
39  
40  
41  
42  
43  
44  
45  
46  
47  
48  
49  
50  
51  
52  
53  
54  
55  
56  
57  
58  
59  
60

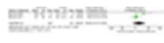

Figure 2: 6 minute walk test (metres) at 6 months.

6x1mm (300 x 300 DPI)

For peer review only

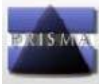

# PRISMA 2009 Checklist

| Section/topic                      | #  | Checklist item                                                                                                                                                                                                                                                                                              | Reported on page # |
|------------------------------------|----|-------------------------------------------------------------------------------------------------------------------------------------------------------------------------------------------------------------------------------------------------------------------------------------------------------------|--------------------|
| <b>TITLE</b>                       |    |                                                                                                                                                                                                                                                                                                             | <b>1</b>           |
| Title                              | 1  | Identify the report as a systematic review, meta-analysis, or both.                                                                                                                                                                                                                                         | 1                  |
| <b>ABSTRACT</b>                    |    |                                                                                                                                                                                                                                                                                                             | <b>2</b>           |
| Structured summary                 | 2  | Provide a structured summary including, as applicable: background; objectives; data sources; study eligibility criteria, participants, and interventions; study appraisal and synthesis methods; results; limitations; conclusions and implications of key findings; systematic review registration number. | 2-3                |
| <b>INTRODUCTION</b>                |    |                                                                                                                                                                                                                                                                                                             | <b>3</b>           |
| Rationale                          | 3  | Describe the rationale for the review in the context of what is already known.                                                                                                                                                                                                                              | 3                  |
| Objectives                         | 4  | Provide an explicit statement of questions being addressed with reference to participants, interventions, comparisons, outcomes, and study design (PICOS).                                                                                                                                                  | 4                  |
| <b>METHODS</b>                     |    |                                                                                                                                                                                                                                                                                                             | <b>4</b>           |
| Protocol and registration          | 5  | Indicate if a review protocol exists, if and where it can be accessed (e.g., Web address), and, if available, provide registration information including registration number.                                                                                                                               | 4                  |
| Eligibility criteria               | 6  | Specify study characteristics (e.g., PICOS, length of follow-up) and report characteristics (e.g., years considered, language, publication status) used as criteria for eligibility, giving rationale.                                                                                                      | 4                  |
| Information sources                | 7  | Describe all information sources (e.g., databases with dates of coverage, contact with study authors to identify additional studies) in the search and date last searched.                                                                                                                                  | 5                  |
| Search                             | 8  | Present full electronic search strategy for at least one database, including any limits used, such that it could be repeated.                                                                                                                                                                               | 5                  |
| Study selection                    | 9  | State the process for selecting studies (i.e., screening, eligibility, included in systematic review, and, if applicable, included in the meta-analysis).                                                                                                                                                   | 5                  |
| Data collection process            | 10 | Describe method of data extraction from reports (e.g., piloted forms, independently, in duplicate) and any processes for obtaining and confirming data from investigators.                                                                                                                                  | 5                  |
| Data items                         | 11 | List and define all variables for which data were sought (e.g., PICOS, funding sources) and any assumptions and simplifications made.                                                                                                                                                                       | 5                  |
| Risk of bias in individual studies | 12 | Describe methods used for assessing risk of bias of individual studies (including specification of whether this was done at the study or outcome level), and how this information is to be used in any data synthesis.                                                                                      | 5                  |
| Summary measures                   | 13 | State the principal summary measures (e.g., risk ratio, difference in means).                                                                                                                                                                                                                               | 6                  |
| Synthesis of results               | 14 | Describe the methods of handling data and combining results of studies, if done, including measures of consistency (e.g., $I^2$ ) for each meta-analysis.                                                                                                                                                   | 6                  |

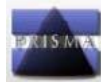

# PRISMA 2009 Checklist

| Section/topic                 | #  | Checklist item                                                                                                                                                                                           | Reported on page # |
|-------------------------------|----|----------------------------------------------------------------------------------------------------------------------------------------------------------------------------------------------------------|--------------------|
| Risk of bias across studies   | 15 | Specify any assessment of risk of bias that may affect the cumulative evidence (e.g., publication bias, selective reporting within studies).                                                             | 6                  |
| Additional analyses           | 16 | Describe methods of additional analyses (e.g., sensitivity or subgroup analyses, meta-regression), if done, indicating which were pre-specified.                                                         | 6                  |
| <b>RESULTS</b>                |    |                                                                                                                                                                                                          | <b>7</b>           |
| Study selection               | 17 | Give numbers of studies screened, assessed for eligibility, and included in the review, with reasons for exclusions at each stage, ideally with a flow diagram.                                          | 7                  |
| Study characteristics         | 18 | For each study, present characteristics for which data were extracted (e.g., study size, PICOS, follow-up period) and provide the citations.                                                             | 8-11               |
| Risk of bias within studies   | 19 | Present data on risk of bias of each study and, if available, any outcome level assessment (see item 12).                                                                                                | 13                 |
| Results of individual studies | 20 | For all outcomes considered (benefits or harms), present, for each study: (a) simple summary data for each intervention group (b) effect estimates and confidence intervals, ideally with a forest plot. | 13                 |
| Synthesis of results          | 21 | Present results of each meta-analysis done, including confidence intervals and measures of consistency.                                                                                                  | 14                 |
| Risk of bias across studies   | 22 | Present results of any assessment of risk of bias across studies (see Item 15).                                                                                                                          | 13                 |
| Additional analysis           | 23 | Give results of additional analyses, if done (e.g., sensitivity or subgroup analyses, meta-regression [see Item 16]).                                                                                    | 14                 |
| <b>DISCUSSION</b>             |    |                                                                                                                                                                                                          | <b>15</b>          |
| Summary of evidence           | 24 | Summarize the main findings including the strength of evidence for each main outcome; consider their relevance to key groups (e.g., healthcare providers, users, and policy makers).                     | 15-17              |
| Limitations                   | 25 | Discuss limitations at study and outcome level (e.g., risk of bias), and at review-level (e.g., incomplete retrieval of identified research, reporting bias).                                            | 17                 |
| Conclusions                   | 26 | Provide a general interpretation of the results in the context of other evidence, and implications for future research.                                                                                  | 17                 |
| <b>FUNDING</b>                |    |                                                                                                                                                                                                          | <b>17</b>          |
| Funding                       | 27 | Describe sources of funding for the systematic review and other support (e.g., supply of data); role of funders for the systematic review.                                                               | 17                 |

From: Moher D, Liberati A, Tetzlaff J, Altman DG, The PRISMA Group (2009). Preferred Reporting Items for Systematic Reviews and Meta-Analyses: The PRISMA Statement. PLoS Med 6(7): e1000097. doi:10.1371/journal.pmed1000097

For more information, visit: [www.prisma-statement.org](http://www.prisma-statement.org).
